# Supplementary material
Source: Research Square preprint supplement (doi:10.21203/rs.3.rs-9278930/v1)
Supplement: Supplementary file 1 [file 8d0399ed2f14ec0a9d20a8a5.docx]

**Supplementary Information**

***TAS2R38* Polymorphism and Bitter Taste Perception: Implications for *Satmaya* and *Upashaya-Anupshaya* Beyond *Prakriti***

**This file includes -**

1. **Supplementary Verses**
2. **Supplementary Figures**
3. **Supplementary Tables**

**INDEX**

**Supplementary Verses**

Supplementary Verse 1……..………………………………………………………………2

Supplementary Verse 2….…….……………………………………………………………2

Supplementary Verse 3……..………………………………………………………………3

Supplementary Verse 4……..………………………………………………………………3

Supplementary Verse 5….……….…………………………………………………………4

Supplementary Verse 6….……….…………………………………………………………4

Supplementary Verse 7….……….…………………………………………………………5

**Supplementary Figures**

Supplementary Figure 1………….………………………………………………………6

**Supplementary Tables**

**Supplementary Table 1a** Distribution of TAS2R38 bitter taste phenotypes…………...7

**Supplementary Table 1b** HWE Analysis of TAS2R38 Bitter Taste Phenotypes………7

**Supplementary Table 2** Genotype vs Phenotype (IITJ and Ayurveda cohort)...…..….. 7

**Supplementary Table 3** Distribution of TAS2R38 (rs713598G>C) (Ala → Pro).……..8

**Supplementary Table 4** Distribution of TAS2R38 (rs1726866G>A) (Ala → Val) ……9

**Supplementary Table 5** Distribution of TAS2R38 (rs10246939C>T) (Iso → Val) ...…9

**Supplementary Verse 1:**


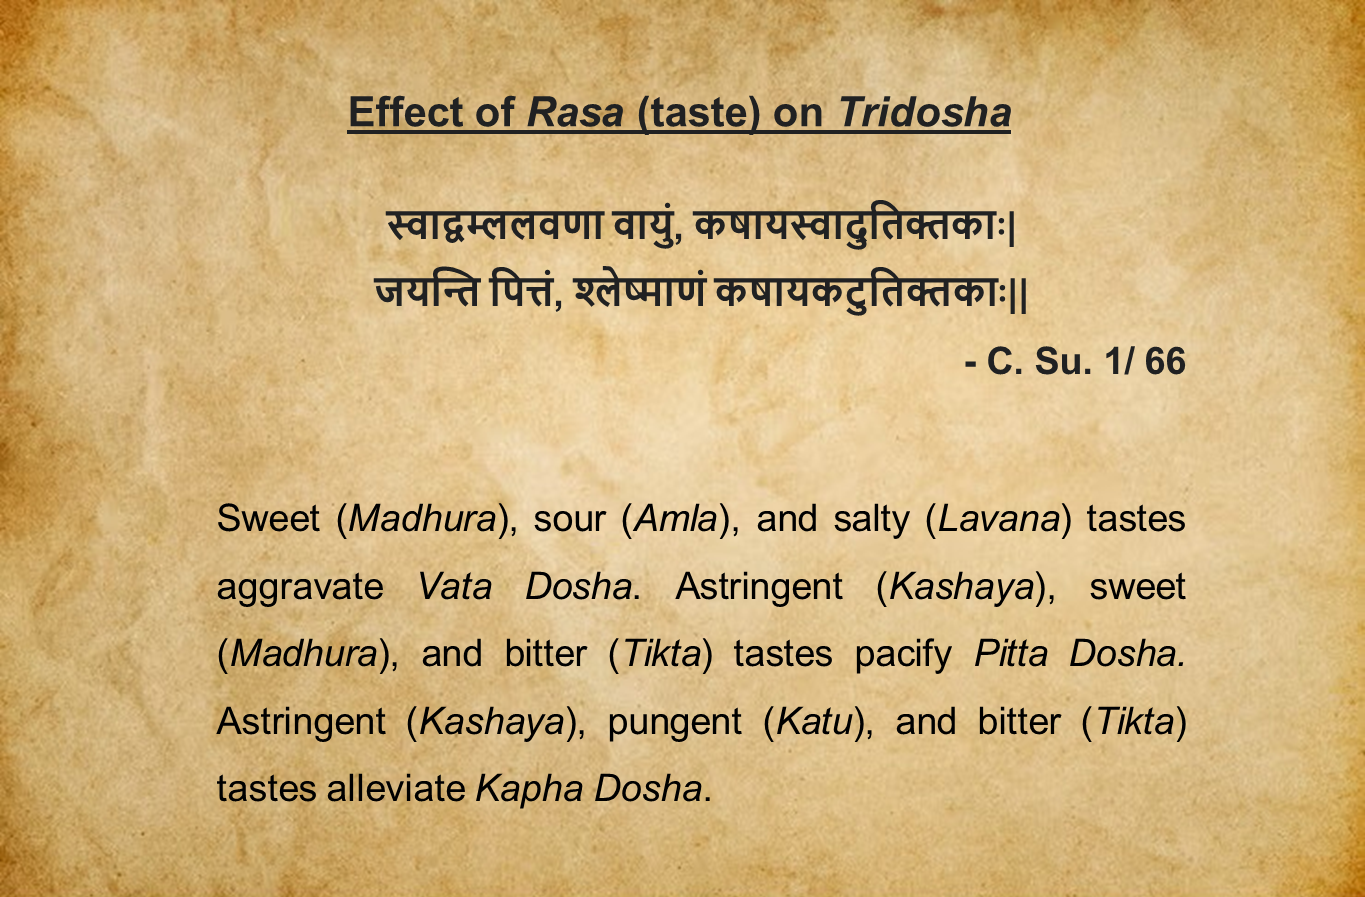


**Supplementary Verse 1: This verse explains the effects of the six *Rasa* on the *Dosha*.**

**Supplementary Verse 2:**


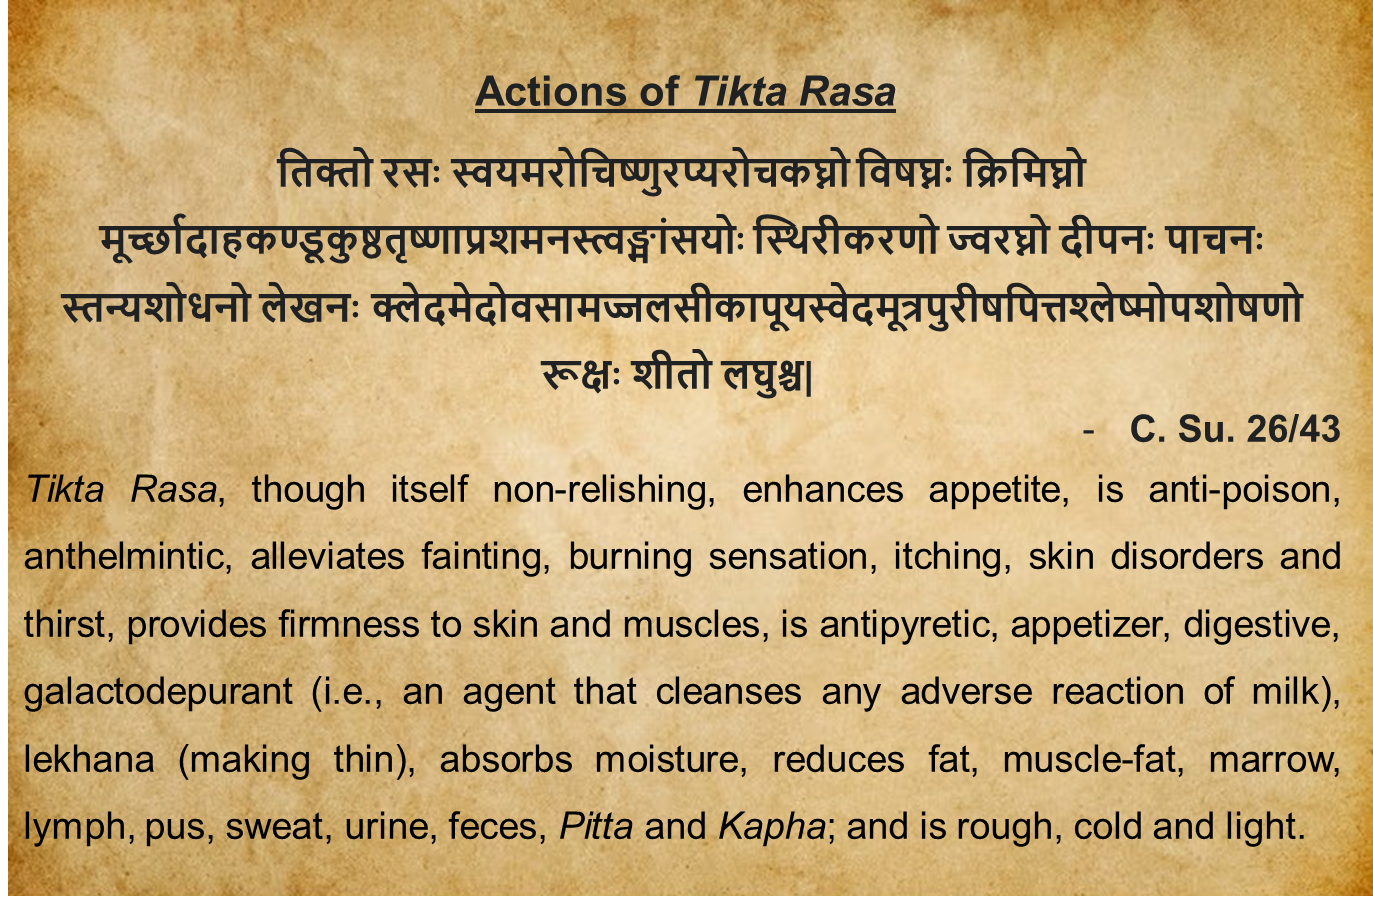


**Supplementary Verse 2: This verse explains the action of *Tikta Rasa* (bitter taste).**

**Supplementary Verse 3:**

**
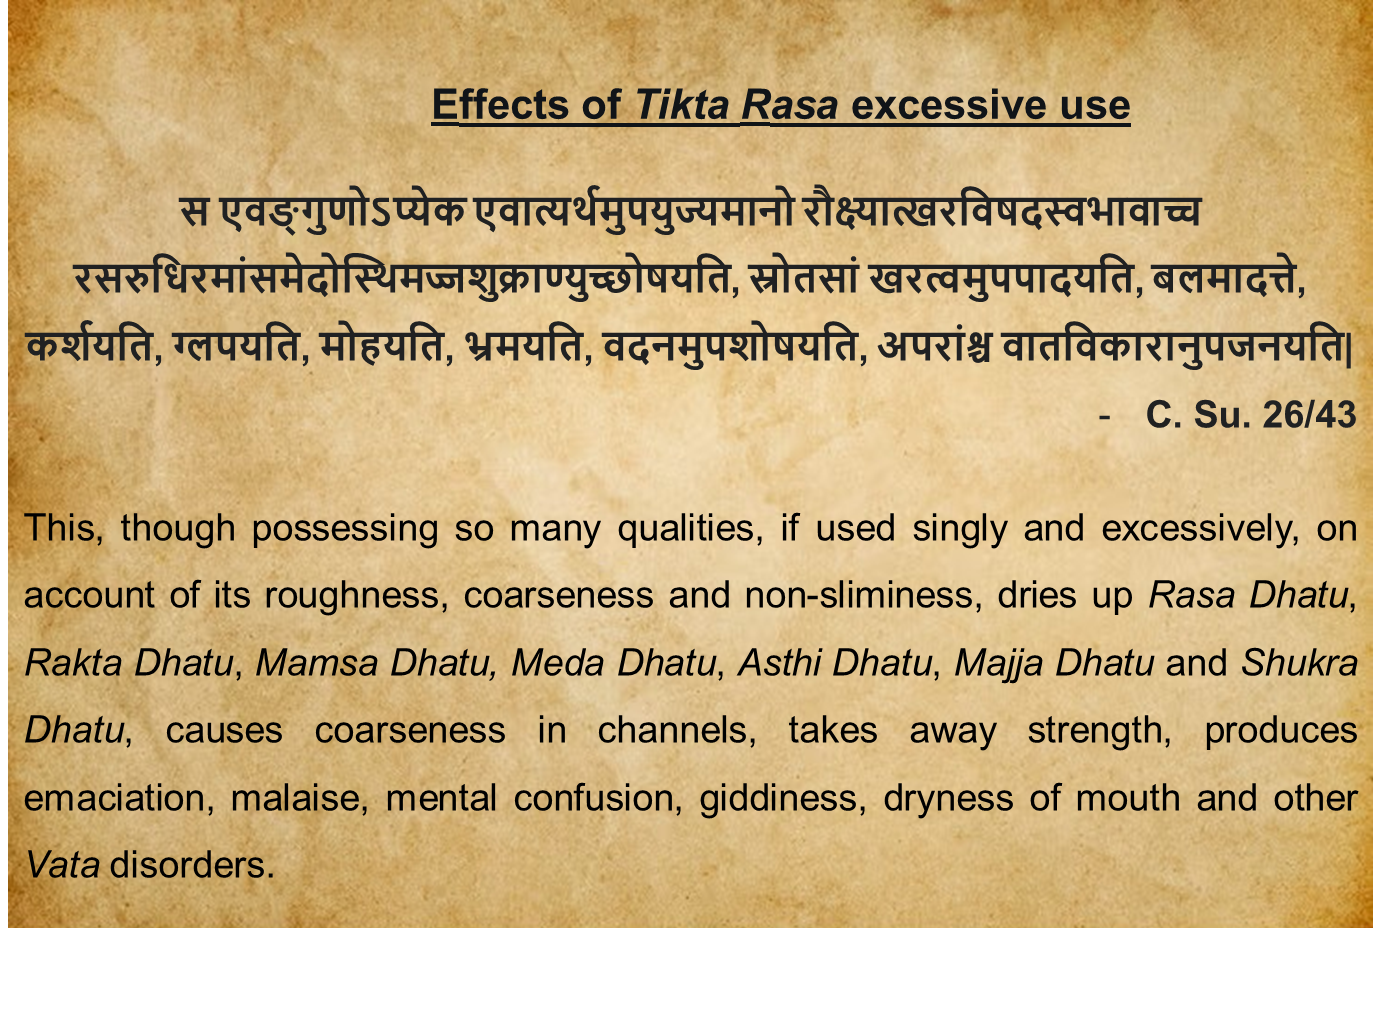
**

**Supplementary Verse 3: This verse explains the side effects of *Tikta Rasa* excessive use.**

**Supplementary Verse 4:**

**
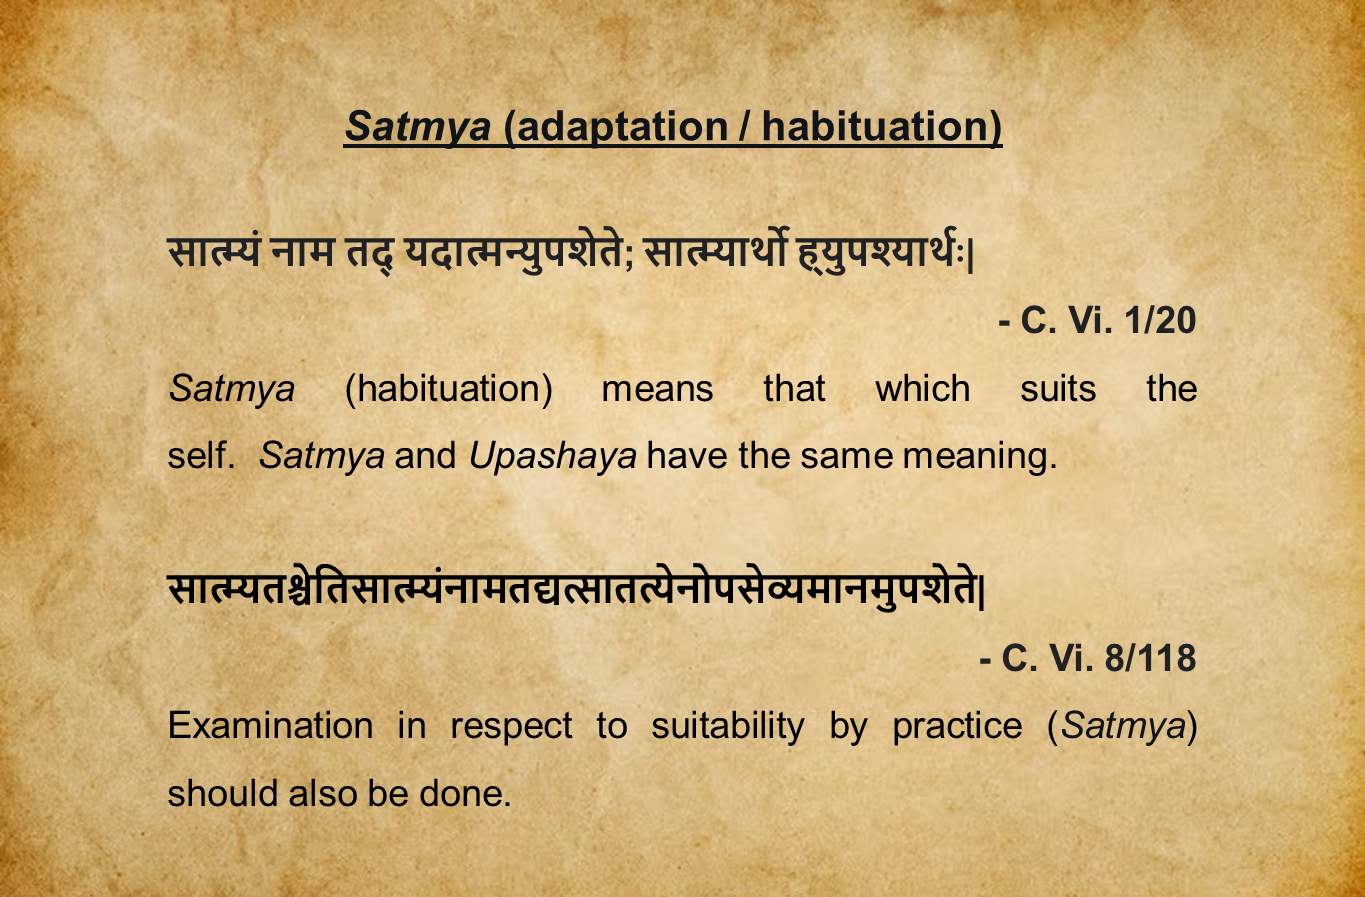
**

**Supplementary Verse 4: This verse explains the *Satmya* (adaptation).**

**Supplementary Verse 5:**

**
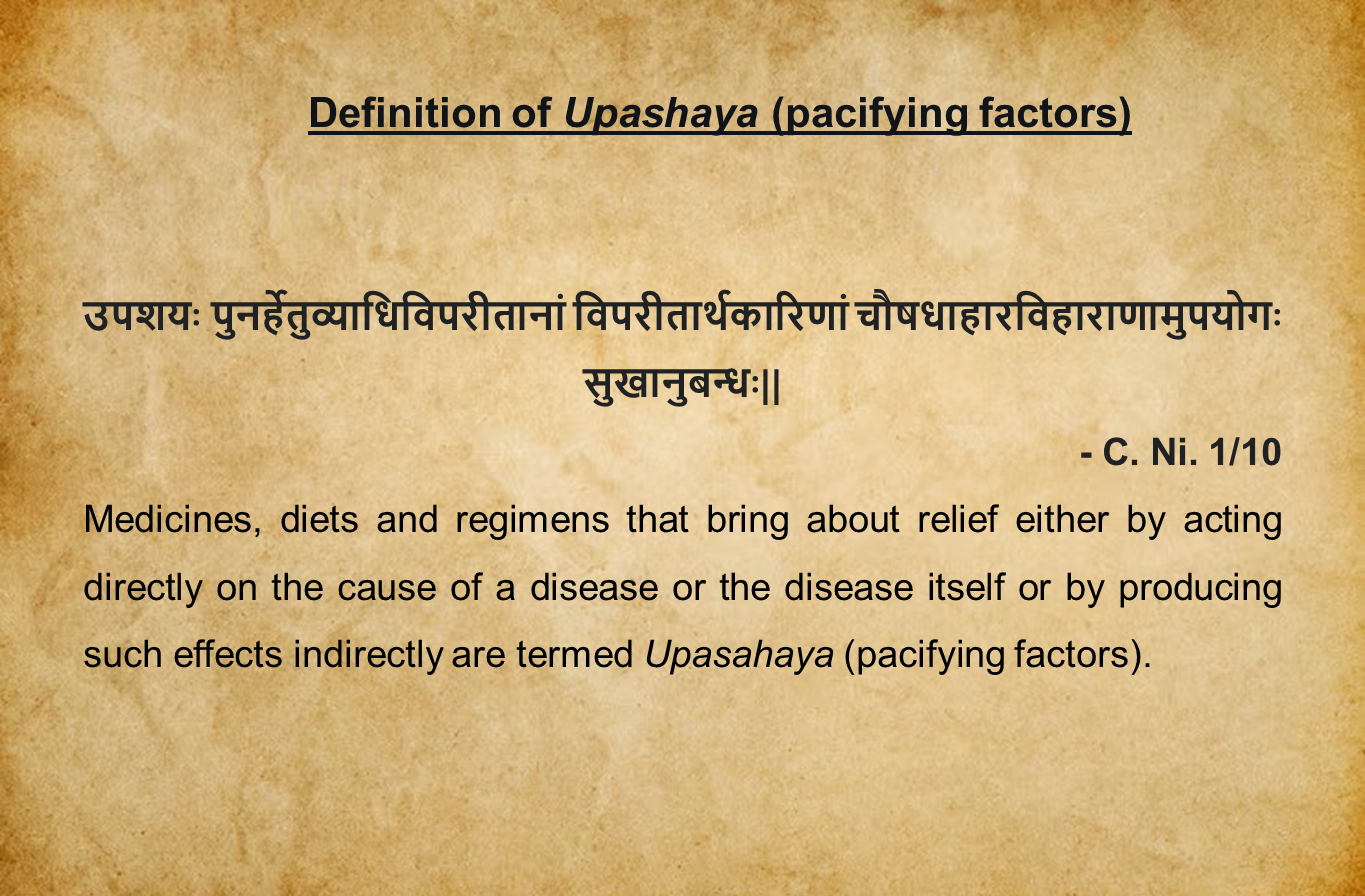
**

**Supplementary Verse 5: This verse explains the *Upashaya- Anupshaya* (pacifying factors).**

**Supplementary Verse 6:**


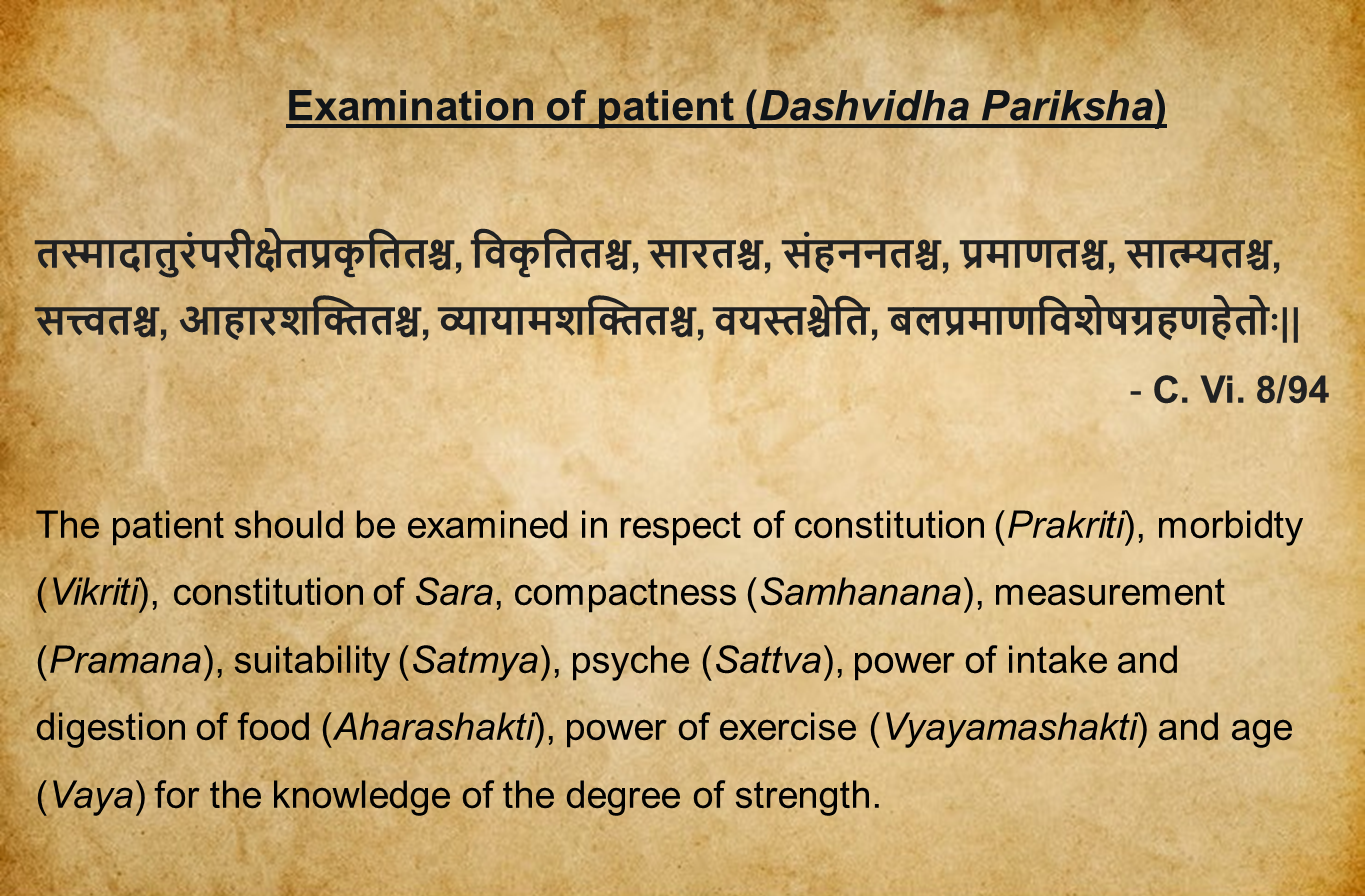


**Supplementary Verse 6: This verse explains the ten fold examination of patients (*Dashavidha Pariksha*)*.***

**Supplementary Verse 7:**

**
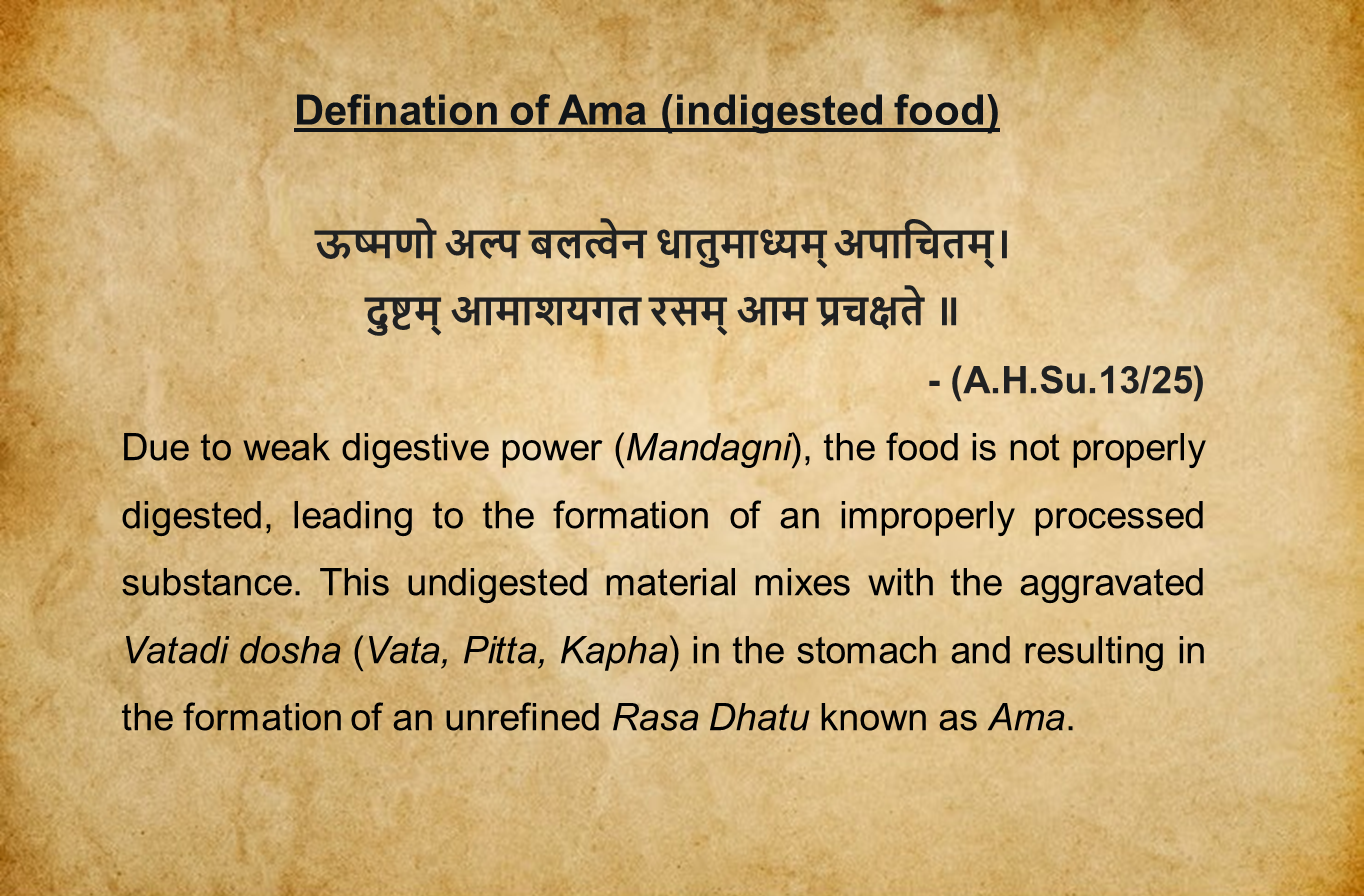
**

**Supplementary Verse 7: This verse explains the *Ama* (indigested food).**

**Supplementary Figures**


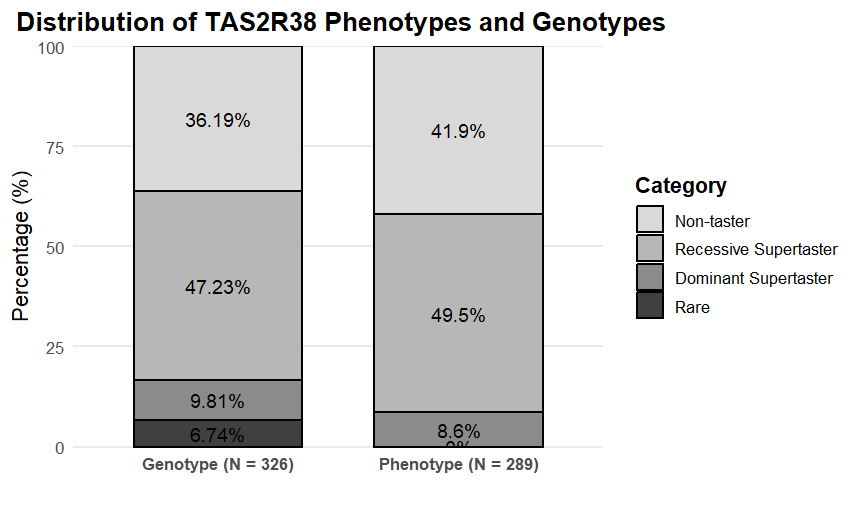


**Supplementary Figure 1.** Distribution of *TAS2R38* bitter taste phenotypes and genotypes in the study population (n = 289). Phenotypically, 41.9% were non-tasters, 49.5% were recessive tasters, and 8.6% were dominant supertasters. Genotypic distribution showed 36.19% non-tasters (AVI/AVI), 47.23% recessive tasters (PAV/AVI), 9.81% dominant supertasters (PAV/PAV), and 6.74% rare variants. Rare variants include uncommon haplotypes such as AAV/AVI, AAI/AVI, PAV/AAV, PVI, PVI/AVI, and PVI/PVV.

**Supplementary Tables**

**Supplementary Table 1a: Distribution of *TAS2R38* bitter taste phenotypes**

| Population | Non-taster, n (%) | Recessive taster, n (%) | Dominant Supertaster, n (%) | Total |
| --- | --- | --- | --- | --- |
| Ayurveda cohort | 44 (40.0) | 55 (50.0) | 11 (10.0) | 110 |
| IITJ cohort | 77 (43.0) | 88 (49.2) | 14 (7.8) | 179 |

**Supplementary Table 1b. HWE Analysis of *TAS2R38* Bitter Taste Phenotypes**

| Population | p (PAV) | q (AVI) | HWE χ² | HWE p-value | HWE Status |
| --- | --- | --- | --- | --- | --- |
| Ayurveda cohort | 0.35 | 0.65 | 1.08 | 0.29 | In equilibrium |
| IITJ cohort | 0.32 | 0.68 | 2.67 | 0.10 | In equilibrium |

**Note:** Both the Ayurveda cohort (χ² = 1.08, p = 0.29) and the IITJ cohort (χ² = 2.67, p = 0.10) conform to HWE, indicating no significant deviation from expected genotype frequencies.

**Concordance Calculations:**

Concordance was calculated as the proportion of individuals in whom the observed bitter taste phenotype matched the phenotype predicted by the *TAS2R38* genotype.

Number of individuals with matching genotype-phenotype pairs

Concordance = -------------------------------------------------------------------------------

Total number of individuals in that genotype category

**Supplementary Table 2: Genotype vs Phenotype (IITJ and Ayurveda cohort)**

| Phenotype/Genotype | Non-Taster (Genotype)  AVI/AVI | Recessive Taster (Genotype)  PAV/AVI | Dominant Supertaster (genotype)  PAV/PAV | Total |
| --- | --- | --- | --- | --- |
| **IITJ cohort** | | | | |
| Non-Taster (Phenotype) | 50 | 12 | 2 | 64 |
| Recessive Taster (Phenotype) | 13 | 54 | 15 | 82 |
| Dominant Supertaster (Phenotype) | 0 | 7 | 1 | 8 |
| Total | 63 | 73 | 18 | 154 |
| **Ayurveda cohort** | | | | |
| Non-Taster (Phenotype) | 32 | 8 | 1 | 41 |
| Recessive Taster (Phenotype) | 7 | 37 | 5 | 49 |
| Dominant Supertaster (Phenotype) | 0 | 7 | 4 | 11 |
| Total | 39 | 52 | 10 | 101 |
| **Grand Total** | **102** | **125** | **28** | **255** |

Note: A difference in the total numbers may be observed as rare genotypes (AAV/AVI, AAI/AVI, PAV/AAV, PVI, PVI/AVI, and PVI/PVV) were not considered in the study.

**Supplementary Table 3: Distribution of *TAS2R38* (rs713598G>C) *(Ala → Pro)***

| Phenotype/Genotype | CC *(Ala)* | GC *(Pro/Ala)* | GG*(Pro)* | Total |
| --- | --- | --- | --- | --- |
| **IITJ cohort** | | | | |
| Non-Taster | 57 | 12 | 5 | 74 |
| Recessive Taster | 13 | 58 | 15 | 86 |
| Dominant Supertaster | 0 | 13 | 1 | 14 |
| Total | 70 | 83 | 21 | 174 |
| Concordance: Genotype w.r.t. Phenotype | 0.77 | 0.67 | 0.07 | - |
| **Ayurveda cohort** | | | | |
| Non-Taster | 33 | 10 | 1 | 44 |
| Recessive Taster | 11 | 39 | 5 | 55 |
| Dominant Supertaster | 0 | 7 | 4 | 11 |
| Total | 44 | 56 | 10 | 110 |
| Concordance: Genotype w.r.t. Phenotype | 0.75 | 0.71 | 0.36 | - |

**Note:** The highlighted portion represents the concordance of genotype w.r.t. phenotype.

**Supplementary Table 4: Distribution of *TAS2R38* (rs1726866G>A) *(Ala → Val)***

| Phenotype/Genotype | AA*(Val)* | GA*(Ala/Val)* | GG*(Ala)* | Total |
| --- | --- | --- | --- | --- |
| **IITJ cohort** | | | | |
| Non-Taster | 54 | 18 | 2 | 74 |
| Recessive Taster | 13 | 56 | 17 | 86 |
| Dominant Supertaster | 0 | 12 | 2 | 14 |
| Total | 67 | 86 | 21 | 174 |
| Concordance: Genotype w.r.t. Phenotype | 0.73 | 0.65 | 0.14 | - |
| **Ayurveda cohort** | | | | |
| Non-Taster | 32 | 10 | 2 | 44 |
| Recessive Taster | 8 | 41 | 5 | 54 |
| Dominant Supertaster | 0 | 7 | 4 | 11 |
| Total | 40 | 58 | 11 | 109 |
| Concordance: Genotype w.r.t. Phenotype | 0.73 | 0.76 | 0.36 | - |

**Note:** The highlighted portion represents the concordance of genotype w.r.t. phenotype.

**Supplementary Table 5: Distribution of *TAS2R38* (rs10246939C>T) *(Iso → Val)***

| Phenotype/Genotype | TT*(Iso)* | CT*(Val/Iso)* | CC*(Val)* | Total |
| --- | --- | --- | --- | --- |
| **IITJ cohort** | | | | |
| Non-Taster | 52 | 20 | 2 | 74 |
| Recessive Taster | 13 | 56 | 17 | 86 |
| Dominant Supertaster | 0 | 12 | 2 | 14 |
| Total | 65 | 88 | 21 | 174 |
| Concordance: Genotype w.r.t. Phenotype | 0.70 | 0.65 | 0.14 | - |
| **Ayurveda cohort** | | | | |
| Non-Taster | 32 | 10 | 2 | 44 |
| Recessive Taster | 10 | 39 | 6 | 55 |
| Dominant Supertaster | 0 | 7 | 4 | 11 |
| Total | 42 | 56 | 12 | 110 |
| Concordance: Genotype w.r.t. Phenotype | 0.73 | 0.71 | 0.36 | - |

**Note:** The highlighted portion represents the concordance of genotype w.r.t. phenotype.
