# Supplementary material
Source: Research Square preprint supplement (doi:10.21203/rs.3.rs-9278930/v1)
Supplement: Supplementary file 1 [file 32ad3bc641efcd186449ddc1.xlsx]

## Sheet: Index
INDEX
Supplementary Table 6	Supp_T_6	Master Sheet_ TAS2R38 Phenotype, genotype. prakriti and with Anthopomentric data
Supplementary Table 7	Supp_T_7	PCA and UMAP coordinates of medicinal Plants
Supplementary Table 8	Supp_T_8	Clusterwise Chemical Enrichment
Supplementary Table 9	Supp_T_9	Distribution and Association Analysis Sheet
Supplementary Table 10	Supp_T_10	Cluster_4_Plants
Supplementary Table 11	Supp_T_10	Cluster wise Plant Counts

## Sheet: Supp_Table_6
APPID	Phenotype_ Taste-Test_	Genotype_Taste	rs713598	rs1726866	rs10246939	BITTERNESS_SCORE	Genotype_Taste	Genotype	SEX	BMI	WHR	AGE	Taste_Preference	Ayurveda_Prakriti	HEIGHT	WAIST	HIP	WEIGHT		Ayurveda_Prakriti
AYT250600812	Non Taster	Dominant Supertaster	GG	GG	CC	0	Dominant Supertaster	PAV	Male	34.53	0.948454	29	Sour, Salty, Pungent, Astringent	KP	170	46	48.5	99.8		KP		155
AYT250600816	Non Taster	Dominant Supertaster	GG	GG	CC	0	Dominant Supertaster	PAV	Male	19.82	0.882353	28	Pungent, Astringent, Sweet, Bitter	KP	179	30	34	63.5		KP
AYT231100013	Non Taster	Non Taster	CC	AA	TT	0	Non Taster	AVI	Male	21.14	0.918919	28	Pungent, Astringent	PV	174	34	37	64		PV
AYT231100042	Non Taster	Non Taster	CC	AA	TT	0	Non Taster	AVI	Female	22.95	0.829268	27	Sweet, Bitter	KP	167	34	41	64		KP
AYT231100056	Non Taster	Non Taster	CC	AA	TT	0	Non Taster	AVI	Male	23.03	0.842105	23	Sour, Salty	PV	168	32	38	65		PV
AYT231200111	Non Taster	Non Taster	CC	AA	TT	0	Non Taster	AVI	Male	21.8	0.914286	45	Sour, Salty	VK	170	32	35	63		VK
AYT240100357	Non Taster	Non Taster	CC	AA	TT	0	Non Taster	AVI	Male	23.28	0.842105	35	Sweet, Bitter	PV	175.26	32	38	71.5		PV
AYT240100414	Non Taster	Non Taster	CC	AA	TT	0		AVI	Female	21.89	0.864865	23	Pungent, Astringent	PV	157.5	32	37	54.3		PV
AYT240100432	Non Taster	Non Taster	CC	AA	TT	0	Non Taster	AVI	Female	32.46	0.888889	29	Pungent, Astringent	KP	156	40	45	79		KP
AYT240300469	Non Taster	Non Taster	CC	AA	TT	0	Non Taster	AVI	Female	27.15	0.85	32	Sour, Salty, Sweet, Bitter	KP	160	34	40	69.5		KP
AYT240300474	Non Taster	Non Taster	CC	AA	TT	0	Non Taster	AVI	Female	24.1	0.939024	33	Sour, Salty	KP	166	38.5	41	66.5		KP
AYT240300483	Non Taster	Non Taster	CC	AA	TT	0	Non Taster	AVI	Male	27.77	0.902439	27	Sour, Salty, Sweet, Bitter	VK	178	37	41	88		VK
AYT240300486	Non Taster	Non Taster	CC	AA	TT	0	Non Taster	AVI	Male	31.63	0.895833	27	Sour, Salty, Sweet, Bitter	VK	186.5	43	48	110		VK
AYT240400496	Non Taster	Non Taster	CC	AA	TT	0	Non Taster	AVI	Male	27.75	0.923077	21	Sour, Salty, Sweet, Bitter	KP	170	36	39	80.2		KP
AYT241100668	Non Taster	Non Taster	CC	AA	TT	0	Non Taster	AVI	Female	19.4	0.857143	28	Sweet, Bitter	VK	154	30	35	46		VK
AYT241100671	Non Taster	Non Taster	CC	AA	TT	0	Non Taster	AVI	Female	27.34	0.909091	24	Sour, Salty	VK	170	40	44	79		VK
AYT241100674	Non Taster	Non Taster	CC	AA	TT	0	Non Taster	AVI	Male	29.35	0.904762	30	Sour, Salty	VK	178.5	38	42	93.5		VK
AYT241100685	Non Taster	Non Taster	CC	AA	TT	0	Non Taster	AVI	Male	27.38	0.90796	31	Sour, Salty	PV	164.5	36.5	40.2	74.1		PV
AYT241100696	Non Taster	Non Taster	CC	AA	TT	0	Non Taster	AVI	Male	24.63	0.926829	46	Sour, Salty, Pungent, Astringent, Sweet, Bitter	KP	181	38	41	80.7		KP
AYT241200702	Non Taster	Non Taster	CC	AA	TT	0	Non Taster	AVI	Male	25.18	0.9125	24	Sweet, Bitter	KP	172	36.5	40	74.5		KP
AYT241200707	Non Taster	Non Taster	CC	AA	TT	0	Non Taster	AVI	Male	24.21	0.975	27	Sour, Salty, Pungent, Astringent, Sweet, Bitter	VK	176	39	40	75		VK
AYT241200724	Non Taster	Non Taster	CC	AA	TT	0	Non Taster	AVI	Male	24.19	0.961039	26	Sweet, Bitter	KP	173	37	38.5	72.4		KP
AYT250100761	Non Taster	Non Taster	CC	AA	TT	0	Non Taster	AVI	Female	35.95	0.935484	27	Sour, Salty, Pungent, Astringent, Sweet, Bitter	VK	167.2	43.5	46.5	100.5		VK
AYT250100763	Non Taster	Non Taster	CC	AA	TT	0	Non Taster	AVI	Male	26.23	0.987952	25	Pungent, Astringent	KP	173	41	41.5	78.5		KP
AYT250100766	Non Taster	Non Taster	CC	AA	TT	0	Non Taster	AVI	Female	24.41	0.878378	24	Pungent, Astringent	PV	160	32.5	37	62.5		PV
AYT250100778	Non Taster	Non Taster	CC	AA	TT	0	Non Taster	AVI	Male	23.55	0.985915	23	Sweet, Bitter	VK	162.4	35	35.5	62.1		VK
AYT250500791	Non Taster	Non Taster	CC	AA	TT	0	Non Taster	AVI	Female	35.84	1.01053	24	Sour, Salty	KP	154	48	47.5	85		KP
AYT250600794	Non Taster	Non Taster	CC	AA	TT	0	Non Taster	AVI	Male	26.3	0.9375	29	Sour, Salty, Pungent, Astringent, Sweet, Bitter	KP	172	37.5	40	77.8		KP
AYT250600798	Non Taster	Non Taster	CC	AA	TT	0	Non Taster	AVI	Male	25	0.902439	28	Sour, Salty	KP	180	37	41	81		KP
AYT250600799	Non Taster	Non Taster	CC	AA	TT	0	Non Taster	AVI	Female	22.86	0.974359	25	Pungent, Astringent	VK	162	38	39	60		VK
AYT250600802	Non Taster	Non Taster	CC	AA	TT	0	Non Taster	AVI	Male	24.91	0.902439	22	Sour, Salty, Pungent, Astringent	KP	182	37	41	82.5		KP
AYT250600805	Non Taster	Non Taster	CC	AA	TT	0	Non Taster	AVI	Female	26.62	1.05128	27	Sweet, Bitter	VK	162.5	41	39	70.3		VK
AYT250600807	Non Taster	Non Taster	CC	AA	TT	0	Non Taster	AVI	Male	21.52	0.985507	29	Sour, Salty	PV	166	34	34.5	59.3		PV
AYT250600809	Non Taster	Non Taster	CC	AA	TT	0	Non Taster	AVI	Male	27.59	0.9125	28	Sour, Salty, Sweet, Bitter	KP	175	36.5	40	84.5		KP
AYT250600817	Non Taster	Non Taster	CC	AA	TT	0	Non Taster	AVI	Male	25.65	0.864198	28	Pungent, Astringent	KP	187	35	40.5	89.7		KP
AYT250600819	Non Taster	Non Taster	CC	AA	TT	0	Non Taster	AVI	Female	29.37	0.939024	24	Pungent, Astringent	KP	160	38.5	41	75.2		KP
AYT250600823	Non Taster	Non Taster	CC	AA	TT	0	Non Taster	AVI	Male	24.91	0.916667	37	Sweet, Bitter	KP	172	33	36	73.7		KP
AYT250600827	Non Taster	Non Taster	CC	AA	TT	0	Non Taster	AVI	Male	23.35	0.897436	29	Sweet, Bitter	KP	183	35	39	78.2		KP
AYT250600839	Non Taster	Non Taster	CC	AA	TT	0	Non Taster	AVI	Male	21.65	0.84507	23	Sour, Salty, Pungent, Astringent, Sweet, Bitter	KP	175	30	35.5	66.3		KP
AYT250600845	Non Taster	Non Taster	CC	AA	TT	0	Non Taster	AVI	Male	25.53	0.921053	31	Sour, Salty, Pungent, Astringent, Sweet, Bitter	KP	173	35	38	76.4		KP
AYT250600849	Non Taster	Non Taster	CC	AA	TT	0	Non Taster	AVI	Male	22.61	0.85	27	Sour, Salty, Pungent, Astringent, Sweet, Bitter	KP	168.5	34	40	64.2		KP
AYT250600853	Non Taster	Non Taster	CC	AA	TT	0	Non Taster	AVI	Female	19.58	0.944444	29	Sour, Salty	VK	167	34	36	54.6		VK
AYT250600856	Non Taster	Non Taster	CC	AA	TT	0	Non Taster	AVI	Female	24.99	0.875	22	Sour, Salty, Pungent, Astringent	VK	163	35	40	66.4		VK
AYT250600860	Non Taster	Non Taster	CC	AA	TT	0	Non Taster	AVI	Male	26.12	0.974359	35	Sour, Salty, Pungent, Astringent	PV	176	38	39	80.9		PV
AYT250600863	Non Taster	Non Taster	CC	AA	TT	0	Non Taster	AVI	Male	25.45	1.02564	55	Sour, Salty, Sweet, Bitter	KP	169	40	39	72.7		KP
AYT250700873	Non Taster	Non Taster	CC	AA	TT	0	Non Taster	AVI	Male	29.48	0.930233	24	Pungent, Astringent, Sweet, Bitter	VK	178	40	43	93.4		VK
AYT250700881	Non Taster	Non Taster	CC	AA	TT	0	Non Taster	AVI	Male	19	0.9	21	Pungent, Astringent, Sweet, Bitter	PV	175	31.5	35	58.2		PV
AYT250700883	Non Taster	Non Taster	CC	AA	TT	0	Non Taster	AVI	Male	20.32	0.888889	21	Sour, Salty	VPK	186	32	36	70.3		VPK
AYT250700886	Non Taster	Non Taster	CC	AA	TT	0	Non Taster	AVI	Male	25.4	0.868421	30	Sour, Salty	VK	168	33	38	71.7		VK
AYT250700889	Non Taster	Non Taster	CC	AA	TT	0	Non Taster	AVI	Male	24.17	0.902778	46	Sour, Salty, Pungent, Astringent, Sweet, Bitter	PV	167	32.5	36	67.4		PV
AYT250700891	Non Taster	Non Taster	CC	AA	TT	0	Non Taster	AVI	Male	22.85	0.882353	23	Pungent, Astringent	VK	165	30	34	62.2		VK
AYT250700895	Non Taster	Non Taster	CC	AA	TT	0	Non Taster	AVI	Male	27.56	0.876712	41	Pungent, Astringent, Sweet, Bitter	KP	165.5	32	36.5	75.5		KP
AYT231100002	Non Taster	Rare	GG	AA	TC	0	Rare	PVI/PVV	Female	18.99	0.909091	28	Pungent, Astringent	PV	159	30	33	48		PV
AYT231100029	Non Taster	Rare	GG	AA	TC	0	Rare	PVV/PVI	Female	19.73	0.882353	28	Pungent, Astringent	PV	150	30	34	44.4		PV
AYT240100358	Non Taster	Rare	CC	AG	TC	0	Rare	AAV/AVI	Male	24.24	0.916667	33	Sweet, Bitter	KP	165	33	36	66		KP
AYT241100675	Non Taster	Rare	CC	AG	TC	0	Rare	AAV/AVI	Male	24.59	0.96	24	Pungent, Astringent	KP	173	36	37.5	73.6		KP
AYT241200725	Non Taster	Rare	GG	AA	TT	0	Rare	PVI	Female	21.67	1.0122	30	Sour, Salty	KP	172	41.5	41	64.1		KP
AYT250100767	Non Taster	Rare	CC	AG	TC	0	Rare	AAV/AVI	Female	26.85	0.926829	25	Sweet, Bitter	VK	170	38	41	77.6		VK
AYT250600846	Non Taster	Rare	CC	AG	TC	0	Rare	AAV/AVI	Male	29	0.926829	54	Pungent, Astringent, Sweet, Bitter	KP	171	38	41	84.8		KP
AYT250600854	Non Taster	Rare	CC	AG	TC	0	Rare	AAV/AVI	Male	22.74	0.947368	41	Sour, Salty, Sweet, Bitter	KP	176.2	36	38	70.6		KP
AYT250700888	Non Taster	Rare	CC	AG	TC	0	Rare	AAV/AVI	Female	18.91	0.930556	30	Sour, Salty	KP	166	33.5	36	52.1		KP
AYT240300481	Non Taster	Recessive Supertaster	GC	AG	TC	0	Recessive Supertaster	PAV/AVI	Female	23.14	0.831169	31	Sour, Salty	VK	165	32	38.5	63		VK
AYT241100667	Non Taster	Recessive Supertaster	GC	AG	TC	0	Recessive Supertaster	PAV/AVI	Female	24.06	0.916201	28	Pungent, Astringent	VK	148	32.8	35.8	52.7		VK
AYT241100688	Non Taster	Recessive Supertaster	GC	AG	TC	0	Recessive Supertaster	PAV/AVI	Male	29.07	0.948148	43	Sweet, Bitter	VK	166.5	38.4	40.5	80.6		VK
AYT241100692	Non Taster	Recessive Supertaster	GC	AG	TC	0	Recessive Supertaster	PAV/AVI	Male	25.68	0.9125	27	Pungent, Astringent	KP	183	36.5	40	86		KP
AYT250600795	Non Taster	Recessive Supertaster	GC	AG	TC	0	Recessive Supertaster	PAV/AVI	Male	20.31	0.852941	25	Pungent, Astringent	PV	163.8	29	34	54.5		PV
AYT250600815	Non Taster	Recessive Supertaster	GC	AG	TC	0	Recessive Supertaster	PAV/AVI	Male	26.37	0.871795	29	Pungent, Astringent	VK	171	34	39	77.1		VK
AYT250600821	Non Taster	Recessive Supertaster	GC	AG	TC	0	Recessive Supertaster	PAV/AVI	Female	29.45	0.987805	27	Sweet, Bitter	KP	157	40.5	41	72.6		KP
AYT250600850	Non Taster	Recessive Supertaster	GC	AG	TC	0	Recessive Supertaster	PAV/AVI	Male	28.23	0.952381	39	Sweet, Bitter	VK	173	40	42	84.5		VK
AYT250600858	Non Taster	Recessive Supertaster	GC	AG	TC	0	Recessive Supertaster	PAV/AVI	Male	19.55	0.875	40	Pungent, Astringent	KP	171.5	31.5	36	57.5		KP
AYT250700871	Non Taster	Recessive Supertaster	GC	AG	TC	0	Recessive Supertaster	PAV/AVI	Male	24.58	0.910256	24	Sour, Salty, Pungent, Astringent, Sweet, Bitter	PV	183	35.5	39	82.3		PV
AYT250700878	Non Taster	Recessive Supertaster	GC	AG	TC	0	Recessive Supertaster	PAV/AVI	Male	19.47	0.943182	67	Sweet, Bitter	KP	165	41.5	44	53		KP
AYT250700900	Non Taster	Recessive Supertaster	GC	AG	TC	0	Recessive Supertaster	PAV/AVI	Male	23.75	0.918919	52	Pungent, Astringent	KP	179	34	37	76.1		KP
AYT231100011	Non Taster					0			Male	28.41	0.925	23	Sour, Salty	VK	174	37	40	86		VK
AYT240300479	Non Taster					0			Female	21.77	0.808824	27	Pungent, Astringent	PV	152	27.5	34	50.3		PV
AYT240300485	Non Taster					0			Male	27.57	0.947368	29	Pungent, Astringent	VK	168	36	38	77.8		VK
AYT240300467		Non Taster	CC	AA	TT	0	Non Taster	AVI	Male	22.84	0.945946	27	Sweet, Bitter	KP	170	35	37	66		KP
AYT240300480	Recessive Supertaster	Dominant Supertaster	GG	GG	CC	1	Dominant Supertaster	PAV	Male	32.39	0.904762	31	Sour, Salty, Sweet, Bitter	VK	162	38	42	85		VK
AYT250600793	Recessive Supertaster	Dominant Supertaster	GG	GG	CC	1	Dominant Supertaster	PAV	Male	24.62	0.947368	32	Sour, Salty, Pungent, Astringent	KP	179	36	38	78.9		KP
AYT231100024	Recessive Supertaster	Non Taster	CC	AA	TT	1	Non Taster	AVI	Female	22.41	0.914286	25	Pungent, Astringent	VK	165	32	35	61		VK
AYT231100030	Recessive Supertaster	Non Taster	CC	AA	TT	1	Non Taster	AVI	Female	21.85	0.871795	25	Pungent, Astringent	VK	169	34	39	62.4		VK
AYT231100062	Recessive Supertaster	Non Taster	CC	AA	TT	1	Non Taster	AVI	Female	17.84	0.88	25	Pungent, Astringent	VK	174	33	37.5	54		VK
AYT231100063	Recessive Supertaster	Non Taster	CC	AA	TT	1	Non Taster	AVI	Female	25.42	0.896104	26	Sour, Salty	VK	158	34.5	38.5	63.45		VK
AYT231100092	Recessive Supertaster	Non Taster	CC	AA	TT	1	Non Taster	AVI	Male	27.34	0.868421	28	Pungent, Astringent	KP	170	33	38	79		KP
AYT240700516	Recessive Supertaster	Non Taster	CC	AA	TT	1	Non Taster	AVI	Female	22.99	0.932432	30	Sweet, Bitter	VK	161	34.5	37	59.6		VK
AYT241100665	Recessive Supertaster	Non Taster	CC	AA	TT	1	Non Taster	AVI	Female	24.27	0.925	33	Sweet, Bitter	KP	163.4	37	40	64.8		KP
AYT250600801	Recessive Supertaster	Non Taster	CC	AA	TT	1	Non Taster	AVI	Female	18.71	0.926471	25	Sour, Salty	KP	158.5	31.5	34	47		KP
AYT250700892	Recessive Supertaster	Non Taster	CC	AA	TT	1	Non Taster	AVI	Male	20.18	0.882353	23	Sour, Salty, Pungent, Astringent, Sweet, Bitter	PV	176	30	34	62.5		PV
AYT240300463	Recessive Supertaster	Recessive Supertaster	GC	AG	TC	1	Recessive Supertaster	PAV/AVI	Male	20.41	0.918919	28	Sour, Salty	PV	174	34	37	61.8		PV
AYT240300488	Recessive Supertaster	Recessive Supertaster	GC	AG	TC	1	Recessive Supertaster	PAV/AVI	Male	29.14	0.973684	36	Pungent, Astringent	KP	166	37	38	80.3		KP
AYT240300489	Recessive Supertaster	Recessive Supertaster	GC	AG	TC	1	Recessive Supertaster	PAV/AVI	Male	31.53	0.952381	37	Sweet, Bitter	KP	171	40	42	92.2		KP
AYT241100664	Recessive Supertaster	Recessive Supertaster	GC	AG	TC	1	Recessive Supertaster	PAV/AVI	Female	22.64	0.868421	29	Sour, Salty, Sweet, Bitter	KP	154	33	38	53.7		KP
AYT241100676	Recessive Supertaster	Recessive Supertaster	GC	AG	TC	1	Recessive Supertaster	PAV/AVI	Female	28.15	0.915663	29	Pungent, Astringent	VK	156	38	41.5	68.5		VK
AYT250600800	Recessive Supertaster	Recessive Supertaster	GC	AG	TC	1	Recessive Supertaster	PAV/AVI	Male	21.6	0.958333	26	Pungent, Astringent, Sweet, Bitter	PV	176	34.5	36	66.9		PV
AYT250600806	Recessive Supertaster	Recessive Supertaster	GC	AG	TC	1	Recessive Supertaster	PAV/AVI	Male	26.22	0.878049	25	Sweet, Bitter	VK	179	36	41	84		VK
AYT250600831	Recessive Supertaster	Recessive Supertaster	GC	AG	TC	1	Recessive Supertaster	PAV/AVI	Female	22.15	0.941176	28	Pungent, Astringent	KP	157	32	34	54.6		KP
AYT250600859	Recessive Supertaster	Recessive Supertaster	GC	AG	TC	1	Recessive Supertaster	PAV/AVI	Male	25.41	0.938272	28	Pungent, Astringent	KP	177	38	40.5	79.6		KP
AYT250700882	Recessive Supertaster	Recessive Supertaster	GC	AG	TC	1	Recessive Supertaster	PAV/AVI	Male	21.21	0.861111	21	Sour, Salty, Pungent, Astringent, Sweet, Bitter	KP	178	31	36	67.2		KP
AYT231100023	Recessive Supertaster	Recessive Supertaster	GC	AG	TC	1		PAV/AVI	Male	32.18	0.909091	27	Pungent, Astringent	KP	170	40	44	93		KP
AYT240300487	Recessive Supertaster					1			Male	22.52	0.885714	31	Sour, Salty, Pungent, Astringent, Sweet, Bitter	VK	173	31	35	67.4		VK
AYT250600829	Recessive Supertaster					1			Male	20.65	0.857143	26	Sour, Salty, Sweet, Bitter	PV	172	30	35	61.1		PV
AYT231100004	Recessive Supertaster	Dominant Supertaster	GG	GG	CC	1	Dominant Supertaster	PAV	Male	17.99	0.969697	22	Sour, Salty	VK	178	32	33	57		VK
AYT231100019	Recessive Supertaster	Dominant Supertaster	GG	GG	CC	2	Dominant Supertaster	PAV	Male	21.63	0.916667	25	Pungent, Astringent	PV	172	33	36	64		PV
AYT250600818	Recessive Supertaster	Dominant Supertaster	GG	GG	CC	2	Dominant Supertaster	PAV	Female	18.27	0.921053	28	Sweet, Bitter	VK	184.5	35	38	62.2		VK
AYT231100012	Recessive Supertaster	Non Taster	CC	AA	TT	2	Non Taster	AVI	Male	20.81	0.864865	26	Sour, Salty	PV	174	32	37	63		PV
AYT250600804	Recessive Supertaster	Non Taster	CC	AA	TT	2	Non Taster	AVI	Male	18.59	0.945946	22	Sour, Salty, Pungent, Astringent, Sweet, Bitter	KP	189	35	37	66.4		KP
AYT250700880	Recessive Supertaster	Non Taster	CC	AA	TT	2	Non Taster	AVI	Male	22.38	0.88	20	Pungent, Astringent	KP	180	33	37.5	72.5		KP
AYT250600830	Recessive Supertaster	Rare	GC	GG	CC	2	Rare	PAV/AAV	Female	22.23	0.957746	26	Sweet, Bitter	VK	159	34	35.5	56.2		VK
AYT231100009	Recessive Supertaster	Recessive Supertaster	GC	AG	TC	2	Recessive Supertaster	PAV/AVI	Male	20.02	0.842105	42	Sweet, Bitter	PV	176	32	38	62		PV
AYT231100047	Recessive Supertaster	Recessive Supertaster	GC	AG	TC	2	Recessive Supertaster	PAV/AVI	Female	21.19	0.868421	26	Pungent, Astringent	KP	164	33	38	57		KP
AYT231100085	Recessive Supertaster	Recessive Supertaster	GC	AG	TC	2	Recessive Supertaster	PAV/AVI	Male	20.2	0.947368	26	Pungent, Astringent	VK	178	36	38	64		VK
AYT231100089	Recessive Supertaster	Recessive Supertaster	GC	AG	TC	2	Recessive Supertaster	PAV/AVI	Female	26.27	0.972973	27	Pungent, Astringent	KP	157	36	37	64.75		KP
AYT240100351	Recessive Supertaster	Recessive Supertaster	GC	AG	TC	2	Recessive Supertaster	PAV/AVI	Male	23.67	0.944444	31	Sour, Salty	PV	178	34	36	75		PV
AYT240300470	Recessive Supertaster	Recessive Supertaster	GC	AG	TC	2	Recessive Supertaster	PAV/AVI	Male	23.9	0.839506	38	Sweet, Bitter	VK	179	34	40.5	76.5		VK
AYT240500509	Recessive Supertaster	Recessive Supertaster	GC	AG	TC	2	Recessive Supertaster	PAV/AVI	Male	19.69	0.87766	36	Sweet, Bitter	KP	175	33	37.6	60.3		KP
AYT240500515	Recessive Supertaster	Recessive Supertaster	GC	AG	TC	2	Recessive Supertaster	PAV/AVI	Female	26.82	0.97561	28	Sour, Salty	VK	168	40	41	75.7		VK
AYT241200708	Recessive Supertaster	Recessive Supertaster	GC	AG	TC	2	Recessive Supertaster	PAV/AVI	Male	25.43	0.97561	30	Sweet, Bitter	KP	174	40	41	77		KP
AYT241200721	Recessive Supertaster	Recessive Supertaster	GC	AG	TC	2	Recessive Supertaster	PAV/AVI	Female	20.31	0.973684	33	Pungent, Astringent	VK	169	37	38	58		VK
AYT250600810	Recessive Supertaster	Recessive Supertaster	GC	AG	TC	2	Recessive Supertaster	PAV/AVI	Male	16.41	0.909091	24	Sour, Salty	PV	177	30	33	51.4		PV
AYT250600832	Recessive Supertaster	Recessive Supertaster	GC	AG	TC	2	Recessive Supertaster	PAV/AVI	Male	21.86	0.945946	47	Sweet, Bitter	KP	181.5	35	37	72		KP
AYT250600864	Recessive Supertaster	Recessive Supertaster	GC	AG	TC	2	Recessive Supertaster	PAV/AVI	Male	17.31	0.984848	54	Sour, Salty, Pungent, Astringent, Sweet, Bitter	PV	164.8	32.5	33	47		PV
AYT250600865	Recessive Supertaster	Recessive Supertaster	GC	AG	TC	2	Recessive Supertaster	PAV/AVI	Male	28.77	0.930233	48	Sour, Salty, Pungent, Astringent, Sweet, Bitter	KP	182	40	43	95.3		KP
AYT250700890	Recessive Supertaster	Recessive Supertaster	GC	AG	TC	2	Recessive Supertaster	PAV/AVI	Male	25.42	0.963415	57	Sour, Salty, Pungent, Astringent, Sweet, Bitter	KP	182	39.5	41	84.2		KP
AYT250700894	Recessive Supertaster	Recessive Supertaster	GC	AG	TC	2	Recessive Supertaster	PAV/AVI	Male	23.55	0.842105	23	Sour, Salty, Pungent, Astringent	KP	174	32	38	71.3		KP
AYT231100041	Recessive Supertaster	Dominant Supertaster	GG	GG	CC	3	Dominant Supertaster	PAV	Male	18.41	0.941176	32	Sour, Salty	KP	179	32	34	59		KP
AYT240300484	Recessive Supertaster	Dominant Supertaster	GG	GG	CC	3	Dominant Supertaster	PAV	Male	29.48	0.866667	30	Sweet, Bitter	VK	178	39	45	93.4		VK
AYT250500790	Recessive Supertaster	Dominant Supertaster	GG	GG	CC	3	Dominant Supertaster	PAV	Female	19.63	0.9375	23	Sour, Salty, Pungent, Astringent	PV	158	30	32	49		PV
AYT250600824	Recessive Supertaster	Dominant Supertaster	GG	GG	CC	3	Dominant Supertaster	PAV	Male	33.13	0.909091	28	Sour, Salty, Pungent, Astringent, Sweet, Bitter	KP	172	40	44	98		KP
AYT250600836	Recessive Supertaster	Dominant Supertaster	GG	GG	CC	3	Dominant Supertaster	PAV	Male	23.05	0.918919	36	Pungent, Astringent, Sweet, Bitter	KP	181	34	37	75.5		KP
AYT250600861	Recessive Supertaster	Dominant Supertaster	GG	GG	CC	3	Dominant Supertaster	PAV	Male	22.42	0.960526	35	Sweet, Bitter	VK	179.2	36.5	38	72		VK
AYT250600844	Recessive Supertaster	Non Taster	CC	AA	TT	3	Non Taster	AVI	Male	21.63	0.888889	31	Sour, Salty, Pungent, Astringent	PV	179	32	36	69.3		PV
AYT250600862	Recessive Supertaster	Rare	GC	GG	CC	3	Rare	PAV/AAV	Male	28.94	0.990476	40	Sour, Salty, Pungent, Astringent, Sweet, Bitter	KP	180.5	41.6	42	94.3		KP
AYT231100037	Recessive Supertaster	Recessive Supertaster	GC	AG	TC	3	Recessive Supertaster	PAV/AVI	Male	17.51	0.878788	21	Sour, Salty	PV	174	29	33	53		PV
AYT231100053	Recessive Supertaster	Recessive Supertaster	GC	AG	TC	3	Recessive Supertaster	PAV/AVI	Male	24.44	0.914286	28	Pungent, Astringent	KP	158	32	35	61		KP
AYT231100073	Recessive Supertaster	Recessive Supertaster	GC	AG	TC	3	Recessive Supertaster	PAV/AVI	Female	20.26	0.944444	31	Sour, Salty	KP	151	34	36	46.2		KP
AYT231100074	Recessive Supertaster	Recessive Supertaster	GC	AG	TC	3	Recessive Supertaster	PAV/AVI	Female	24	0.842105	27	Sweet, Bitter	PV	172	32	38	71		PV
AYT231200110	Recessive Supertaster	Recessive Supertaster	GC	AG	TC	3	Recessive Supertaster	PAV/AVI	Male	25.66	0.948718	40	Sweet, Bitter	KP	182	37	39	85		KP
AYT240300460	Recessive Supertaster	Recessive Supertaster	GC	AG	TC	3	Recessive Supertaster	PAV/AVI	Male	30.08	0.961538	27	Pungent, Astringent, Sweet, Bitter	VK	160	37.5	39	77		VK
AYT240300468	Recessive Supertaster	Recessive Supertaster	GC	AG	TC	3	Recessive Supertaster	PAV/AVI	Male	29.52	0.822222	28	Sour, Salty, Pungent, Astringent, Sweet, Bitter	VK	175	37	45	90.4		VK
AYT240300475	Recessive Supertaster	Recessive Supertaster	GC	AG	TC	3	Recessive Supertaster	PAV/AVI	Male	23.88	0.873016	31	Sweet, Bitter	VK	167.5	33	37.8	67		VK
AYT241100693	Recessive Supertaster	Recessive Supertaster	GC	AG	TC	3	Recessive Supertaster	PAV/AVI	Male	28.23	0.943878	30	Sour, Salty	VK	163	37	39.2	75		VK
AYT250600813	Recessive Supertaster	Recessive Supertaster	GC	AG	TC	3	Recessive Supertaster	PAV/AVI	Male	25.6	0.851852	29	Sweet, Bitter	KP	176	34.5	40.5	79.3		KP
AYT250600834	Recessive Supertaster	Recessive Supertaster	GC	AG	TC	3	Recessive Supertaster	PAV/AVI	Male	24.99	0.936709	45	Sour, Salty	KP	183	37	39.5	83.7		KP
AYT250600841	Recessive Supertaster	Recessive Supertaster	GC	AG	TC	3	Recessive Supertaster	PAV/AVI	Male	25.05	0.863014	30	Sour, Salty, Sweet, Bitter	KP	170	31.5	36.5	72.4		KP
AYT250600842	Recessive Supertaster	Recessive Supertaster	GC	AG	TC	3	Recessive Supertaster	PAV/AVI	Male	20.01	0.828571	25	Sour, Salty	KP	172	29	35	59.2		KP
AYT250600847	Recessive Supertaster	Recessive Supertaster	GC	AG	TC	3	Recessive Supertaster	PAV/AVI	Female	24.09	0.878049	35	Sweet, Bitter	VK	163	36	41	64		VK
AYT250600852	Recessive Supertaster	Recessive Supertaster	GC	AG	TC	3	Recessive Supertaster	PAV/AVI	Male	30.96	0.931818	37	Sour, Salty, Pungent, Astringent, Sweet, Bitter	KP	175	41	44	94.8		KP
AYT231100046	Recessive Supertaster	Dominant Supertaster	GG	GG	CC	4	Dominant Supertaster	PAV	Female	25.71	0.926829	31	Pungent, Astringent	VK	159	38	41	65		VK
AYT241200704	Recessive Supertaster	Dominant Supertaster	GG	GG	CC	4	Dominant Supertaster	PAV	Male	26.86	0.965116	26	Sour, Salty	VK	181	41.5	43	88		VK
AYT250600796	Recessive Supertaster	Dominant Supertaster	GG	GG	CC	4	Dominant Supertaster	PAV	Female	25.18	0.948718	23	Sour, Salty, Pungent, Astringent	KP	162.5	37	39	66.5		KP
AYT250700885	Recessive Supertaster	Dominant Supertaster	GG	GG	CC	4	Dominant Supertaster	PAV	Male	27.26	0.9	31	Pungent, Astringent, Sweet, Bitter	KP	184	36	40	92.3		KP
AYT231100003	Recessive Supertaster	Recessive Supertaster	GC	AG	TC	4	Recessive Supertaster	PAV/AVI	Female	27.47	0.9	33	Sour, Salty	VK	155	36	40	66		VK
AYT231100020	Recessive Supertaster	Recessive Supertaster	GC	AG	TC	4	Recessive Supertaster	PAV/AVI	Male	29.45	0.930233	24	Pungent, Astringent	KP	187	40	43	103		KP
AYT231100051	Recessive Supertaster	Recessive Supertaster	GC	AG	TC	4	Recessive Supertaster	PAV/AVI	Male	24.24	0.914286	23	Pungent, Astringent	KP	165	32	35	66		KP
AYT231100066	Recessive Supertaster	Recessive Supertaster	GC	AG	TC	4	Recessive Supertaster	PAV/AVI	Female	23.92	0.891892	25	Sour, Salty	KP	153	33	37	56		KP
AYT231100069	Recessive Supertaster	Recessive Supertaster	GC	AG	TC	4	Recessive Supertaster	PAV/AVI	Female	20.53	0.871795	23	Sweet, Bitter	KP	182	34	39	68		KP
AYT231100088	Recessive Supertaster	Recessive Supertaster	GC	AG	TC	4	Recessive Supertaster	PAV/AVI	Female	27.55	0.925	27	Pungent, Astringent	KP	165	37	40	75		KP
AYT231100097	Recessive Supertaster	Recessive Supertaster	GC	AG	TC	4	Recessive Supertaster	PAV/AVI	Female	19.14	0.878788	28	Sweet, Bitter	PV	160	29	33	49		PV
AYT231200103	Recessive Supertaster	Recessive Supertaster	GC	AG	TC	4	Recessive Supertaster	PAV/AVI	Female	27.41	0.904762	26	Sweet, Bitter	KP	154	38	42	65		KP
AYT231200117	Recessive Supertaster	Recessive Supertaster	GC	AG	TC	4	Recessive Supertaster	PAV/AVI	Male	17.24	0.857143	27	Pungent, Astringent	VK	177	30	35	54		VK
AYT241100681	Recessive Supertaster	Recessive Supertaster	GC	AG	TC	4	Recessive Supertaster	PAV/AVI	Female	21.05	0.839506	29	Pungent, Astringent	KP	168	34	40.5	59.4		KP
AYT241200722	Recessive Supertaster	Recessive Supertaster	GC	AG	TC	4	Recessive Supertaster	PAV/AVI	Male	26.91	0.9	33	Sour, Salty, Pungent, Astringent	KP	160	36	40	68.9		KP
AYT250600828	Recessive Supertaster	Recessive Supertaster	GC	AG	TC	4	Recessive Supertaster	PAV/AVI	Female	26.06	0.904762	29	Pungent, Astringent, Sweet, Bitter	KP	173	38	42	78		KP
AYT250700904	Recessive Supertaster	Recessive Supertaster	GC	AG	TC	4	Recessive Supertaster	PAV/AVI	Female	23.14	0.87013	23	Sour, Salty, Pungent, Astringent, Sweet, Bitter	VK	161	33.5	38.5	60		VK
AYT240300464	Recessive Supertaster					4			Male	21.63	0.857143	28	Sweet, Bitter	VK	179	30	35	69.3		VK
AYT231100033	Dominant Supertaster	Dominant Supertaster	GG	GG	CC	5	Dominant Supertaster	PAV	Female	23.28	0.894737	25	Pungent, Astringent	PV	153	34	38	54.5		PV
AYT231100007	Dominant Supertaster	Rare	GC	GG	CC	5	Rare	PAV/AAV	Female	22.99	0.857143	31	Sour, Salty	PV	172	36	42	68		PV
AYT231100035	Dominant Supertaster	Recessive Supertaster	GC	AG	TC	5	Recessive Supertaster	PAV/AVI	Male	19.93	0.885714	20	Sour, Salty	KP	182	31	35	66		KP
AYT231100058	Dominant Supertaster	Recessive Supertaster	GC	AG	TC	5	Recessive Supertaster	PAV/AVI	Female	18.83	0.882353	25	Sour, Salty	VK	158	30	34	47		VK
AYT231100087	Dominant Supertaster	Recessive Supertaster	GC	AG	TC	5	Recessive Supertaster	PAV/AVI	Female	18.75	0.852941	27	Sour, Salty	PV	160	29	34	48		PV
AYT250600803	Dominant Supertaster	Recessive Supertaster	GC	AG	TC	5	Recessive Supertaster	PAV/AVI	Female	22.43	0.972222	20	Sour, Salty	VK	158	35	36	56		VK
AYT250600820	Dominant Supertaster	Recessive Supertaster	GC	AG	TC	5	Recessive Supertaster	PAV/AVI	Female	20.54	0.926471	23	Sweet, Bitter	KP	156.8	31.5	34	50.5		KP
AYT250600825	Dominant Supertaster	Recessive Supertaster	GC	AG	TC	5	Recessive Supertaster	PAV/AVI	Female	23.92	0.947368	28	Pungent, Astringent, Sweet, Bitter	KP	167	36	38	66.7		KP
AYT250600833	Dominant Supertaster	Recessive Supertaster	GC	AG	TC	5	Recessive Supertaster	PAV/AVI	Male	27.67	0.9	45	Sweet, Bitter	KP	177	36	40	86.7		KP
AYT231100071		Dominant Supertaster	GG	GG	CC		Dominant Supertaster	PAV	Male	20.99	0.871795	21	Sour, Salty	PV	180	34	39	68		PV
AYT250600811		Dominant Supertaster	GG	GG	CC		Dominant Supertaster	PAV	Male	24.65	0.916667	27	Sour, Salty, Pungent, Astringent	KP	164	33	36	66.3		KP
AYT231100039		Non Taster	CC	AA	TT		Non Taster	AVI	Male	20.99	0.925	21	Pungent, Astringent	KP	180	37	40	68		KP
AYT231100040		Non Taster	CC	AA	TT		Non Taster	AVI	Male	24.06	0.947368	28	Sour, Salty	KP	173	36	38	72		KP
AYT231100052		Non Taster	CC	AA	TT		Non Taster	AVI	Male	24.01	0.916667	29	Sweet, Bitter	KP	162	33	36	63		KP
AYT231100081		Non Taster	CC	AA	TT		Non Taster	AVI	Female	25.63	0.897436	28	Pungent, Astringent	KP	153	35	39	60		KP
AYT231100084		Non Taster	CC	AA	TT		Non Taster	AVI	Female	21.76	0.918919	24	Pungent, Astringent	KP	159	34	37	55		KP
AYT240100349		Non Taster	CC	AA	TT		Non Taster	AVI	Male	31.14	0.952381	27	Pungent, Astringent	VK	170	40	42	90		VK
AYT241100672		Non Taster	CC	AA	TT		Non Taster	AVI	Female	23.05	0.910256	43	Sweet, Bitter	KP	162	35.5	39	60.5		KP
AYT241200706		Non Taster	CC	AA	TT		Non Taster	AVI	Female	25.11	0.923077	32	Sour, Salty	KP	157	36	39	61.9		KP
AYT250100728		Non Taster	CC	AA	TT		Non Taster	AVI	Female	21.08	0.956522	26	Sour, Salty	KP	163	33	34.5	56		KP
AYT231100086		Rare	CC	AG	TC		Rare	AAV/AVI	Female	26.72	0.906977	28	Sweet, Bitter	KP	163	39	43	71		KP
AYT241100670		Rare	GC	GG	CC		Rare	PAV/AAV	Female	23.73	0.864865	35	Sour, Salty, Pungent, Astringent	PV	155	32	37	57		PV
AYT231100044		Recessive Supertaster	GC	AG	TC		Recessive Supertaster	PAV/AVI	Female	23.05	0.894737	26	Sour, Salty	VK	164	34	38	62		VK
AYT231100050		Recessive Supertaster	GC	AG	TC		Recessive Supertaster	PAV/AVI	Female	31.89	0.909091	31	Sweet, Bitter	VK	168	40	44	90		VK
AYT231100061		Recessive Supertaster	GC	AG	TC		Recessive Supertaster	PAV/AVI	Female	19.72	0.944444	29	Sour, Salty	PV	156	34	36	48		PV
AYT231100077		Recessive Supertaster	GC	AG	TC		Recessive Supertaster	PAV/AVI	Male	22.53	0.9	27	Sweet, Bitter	KP	180	36	40	73		KP
AYT231100079		Recessive Supertaster	GC	AG	TC		Recessive Supertaster	PAV/AVI	Female	23.23	0.9	28	Sweet, Bitter	VK	166	36	40	64		VK
AYT231100082		Recessive Supertaster	GC	AG	TC		Recessive Supertaster	PAV/AVI	Female	26.04	0.914634	26	Sour, Salty	PV	158	37.5	41	65		PV
AYT240100434		Recessive Supertaster	GC	AG	TC		Recessive Supertaster	PAV/AVI	Female	20.57	0.815789	27	Sour, Salty	VK	165	31	38	56		VK
AYT241100683		Recessive Supertaster	GC	AG	TC		Recessive Supertaster	PAV/AVI	Male	27.66	1.025	44	Sweet, Bitter	KP	166.2	41	40	76.4		KP
AYT241100698		Recessive Supertaster	GC	AG	TC		Recessive Supertaster	PAV/AVI	Male	23.55	0.921053	33	Sour, Salty, Pungent, Astringent	VK	178	35	38	74.6		VK
AYT241100699		Recessive Supertaster	GC	AG	TC		Recessive Supertaster	PAV/AVI	Male	29.4	0.904762	32	Pungent, Astringent	KP	174	38	42	89		KP
AYT250600808		Recessive Supertaster	GC	AG	TC		Recessive Supertaster	PAV/AVI	Female	25.59	0.906667	38	Sour, Salty, Pungent, Astringent	VK	153.5	34	37.5	60.3		VK
AYT250700884		Recessive Supertaster	GC	AG	TC		Recessive Supertaster	PAV/AVI	Male	18.67	0.882353	19	Pungent, Astringent	KP	168	30	34	52.7		KP
AYT250700896		Recessive Supertaster	GC	AG	TC		Recessive Supertaster	PAV/AVI	Male	26.61	0.897436	30	Sour, Salty, Pungent, Astringent, Sweet, Bitter	KP	167	35	39	74.2		KP
AYT231100036	Dominant Supertaster	Recessive Supertaster	GC	AG	TC	4	Recessive Supertaster	PAV/AVI	Female	21.11	0.888889	25	Pungent, Astringent	V	146	32	36	45		V
AYT240100413	Dominant Supertaster	Recessive Supertaster	GC	AG	TC	4	Recessive Supertaster	PAV/AVI	Female	17.5	0.9	23	Pungent, Astringent	V	154	27	30	41.5		V
AYT250700872	Dominant Supertaster	Recessive Supertaster	GC	AG	TC	4	Recessive Supertaster	PAV/AVI	Female	15.39	0.95	23	Pungent, Astringent	V	163.6	28.5	30	41.2		V
AYT250600822	Non Taster	Non Taster	CC	AA	TT	0	Non Taster	AVI	Female	25.44	0.9	29	Sour, Salty	K	163	36	40	67.6		K
AYT231100031	Dominant Supertaster	Recessive Supertaster	GC	AG	TC	3	Recessive Supertaster	PAV/AVI	Female	27.79	0.947368	29	Sour, Salty	K	157	36	38	68.5		K
AYT240100359	Recessive Supertaster	Recessive Supertaster	GC	AG	TC	3	Recessive Supertaster	PAV/AVI	Male	27.17	0.9	28	Sour, Salty	K	182	36	40	90		K
AYT241200719	Dominant Supertaster	Recessive Supertaster	GC	AG	TC	1	Recessive Supertaster	PAV/AVI	Female	20.7	0.922078	24	Sweet, Bitter	P	160	35.5	38.5	53		P
AYT231100054		Recessive Supertaster	GC	AG	TC		Recessive Supertaster	PAV/AVI	Male	30.42	0.863636	20	Sweet, Bitter	K	172	38	44	90		K
															0	#N/A	#N/A	#N/A
AYT231100043	Non Taster	Non Taster	CC	AA	TT	0	Non Taster	AVI	Male	27.02	0.9	28	Pungent, Astringent	K	171	36	40	79		K
AYT231200106	Non Taster	Non Taster	CC	AA	TT	0	Non Taster	AVI	Male	20.94	0.914286	26	Sweet, Bitter	P	165	32	35	57		P
AYT231200105	Non Taster	Non Taster	CC	AA	TT	0	Non Taster	AVI	Female	21.34	0.882353	26	Sour, Salty	KP	162	30	34	56		KP
AYT231200123	Non Taster	Non Taster	CC	AA	TT	0	Non Taster	AVI	Male	21.72	0.864865	27	Sour, Salty	KP	173	32	37	65		KP
AYT231200161	Non Taster	Non Taster	CC	AA	TT	0	Non Taster	AVI	Female	22.48	0.918919	26	Sour, Salty	P	155	34	37	54		P
AYT231200163	Non Taster	Non Taster	CC	AA	TT	0	Non Taster	AVI	Female	16.99	0.914286	26	Sour, Salty	VK	160	32	35	43.5		VK
AYT231200176	Non Taster	Non Taster	CC	AA	TT	0	Non Taster	AVI	Female	20.43	0.88	29	Sweet, Bitter	V	158	33	37.5	51		V
AYT231200178	Non Taster	Non Taster	CC	AA	TT	0	Non Taster	AVI	Female	16.17	0.875	29	Sour, Salty	V	157	28	32	39.85		V
AYT231200186	Non Taster	Non Taster	CC	AA	TT	0	Non Taster	AVI	Female	23.36	0.931507	27	Sour, Salty	KP	156	34	36.5	56.85		KP
AYT231200200	Non Taster	Non Taster	CC	AA	TT	0	Non Taster	AVI	Female	23.07	0.90411	28	Sweet, Bitter	KP	150	33	36.5	51.9		KP
AYT231200209	Non Taster	Non Taster	CC	AA	TT	0	Non Taster	AVI	Female	20.31	0.914286	26	Sweet, Bitter	PV	169	32	35	58		PV
AYT231200266	Non Taster	Non Taster	CC	AA	TT	0	Non Taster	AVI	Male	26.22	0.86747	20	Sweet, Bitter	KP	179	36	41.5	84		KP
AYT240100404	Non Taster	Non Taster	CC	AA	TT	0	Non Taster	AVI	Male	24.42	0.941176	22	Pungent, Astringent	KP	157	32	34	60.2		KP
AYT240800537	Non Taster	Non Taster	CC	AA	TT	0	Non Taster	AVI	Female	25.59	0.916667	25	Sour, Salty	VK	153	33	36	59.9		VK
AYT240800547	Non Taster	Non Taster	CC	AA	TT	0	Non Taster	AVI	Male	26.59	1.05797	30	Sour, Salty	KP	165	36.5	34.5	72.4		KP
AYT240800548	Non Taster	Non Taster	CC	AA	TT	0	Non Taster	AVI	Female	24.5	1.01266	22	Pungent, Astringent, Sweet, Bitter	VK	164	40	39.5	65.9		VK
AYT240800550	Non Taster	Non Taster	CC	AA	TT	0	Non Taster	AVI	Male	26.46	0.9	25	Sweet, Bitter	KP	177	36	40	82.9		KP
AYT240800552	Non Taster	Non Taster	CC	AA	TT	0	Non Taster	AVI	Male	22.41	0.888889	24	Sweet, Bitter	VK	176.5	32	36	69.8		VK
AYT240800560	Non Taster	Non Taster	CC	AA	TT	0	Non Taster	AVI	Female	24.4	0.917808	22	Sour, Salty, Pungent, Astringent	VK	158.5	33.5	36.5	61.3		VK
AYT240800565	Non Taster	Non Taster	CC	AA	TT	0	Non Taster	AVI	Female	18.78	0.810811	22	Sour, Salty, Pungent, Astringent	VPK	164	30	37	50.5		VPK
AYT240800566	Non Taster	Non Taster	CC	AA	TT	0	Non Taster	AVI	Female	22.48	0.810811	22	Sweet, Bitter	KP	155	30	37	54		KP
AYT240800573	Non Taster	Non Taster	CC	AA	TT	0	Non Taster	AVI	Male	14.42	0.738462	21	Sweet, Bitter	VK	163	24	32.5	38.3		VK
AYT240800576	Non Taster	Non Taster	CC	AA	TT	0	Non Taster	AVI	Female	16.45	0.746032	21	Sour, Salty	KP	163	23.5	31.5	43.7		KP
AYT240800580	Non Taster	Non Taster	CC	AA	TT	0	Non Taster	AVI	Female	28.74	0.926829	22	Pungent, Astringent	KP	149	38	41	63.8		KP
AYT240800581	Non Taster	Non Taster	CC	AA	TT	0	Non Taster	AVI	Female	26.98	87.9268	21	Sour, Salty	KP	160.5	3605	41	69.5		KP
AYT240800586	Non Taster	Non Taster	CC	AA	TT	0	Non Taster	AVI	Female	17.5	0.939394	24	Pungent, Astringent	VK	156	31	33	42.6		VK
AYT240800593	Non Taster	Non Taster	CC	AA	TT	0	Non Taster	AVI	Female	17.53	0.955224	25	Pungent, Astringent	V	157	32	33.5	43.2		V
AYT240800597	Non Taster	Non Taster	CC	AA	TT	0	Non Taster	AVI	Female	22.31	0.944444	23	Sweet, Bitter	VK	159	34	36	56.4		VK
AYT240800610	Non Taster	Non Taster	CC	AA	TT	0	Non Taster	AVI	Female	20.06	0.971429	23	Pungent, Astringent	VK	163	34	35	53.3		VK
AYT240900615	Non Taster	Non Taster	CC	AA	TT	0	Non Taster	AVI	Female	25.3	0.891892	22	Pungent, Astringent	KP	154	33	37	60		KP
AYT240900617	Non Taster	Non Taster	CC	AA	TT	0	Non Taster	AVI	Female	18.27	0.918033	22	Sweet, Bitter	VK	148.5	28	30.5	40.3		VK
AYT240900631	Non Taster	Non Taster	CC	AA	TT	0	Non Taster	AVI	Female	17.59	0.914286	23	Sweet, Bitter	KP	158	32	35	43.9		KP
AYT231200129	Non Taster	Rare	CC	AG	TC	0	Rare	AAV/AVI	Female	25.02	0.871795	27	Sweet, Bitter	KP	155	34	39	60.1		KP
AYT231200166	Recessive Supertaster	Non Taster	CC	AA	TT	1	Non Taster	AVI	Female	16.55	0.909091	26	Pungent, Astringent	KP	164	30	33	44.5		KP
AYT231200179	Recessive Supertaster	Non Taster	CC	AA	TT	1	Non Taster	AVI	Female	27.87	0.894118	27	Sour, Salty	VK	161	38	42.5	72.25		VK
AYT240900621	Recessive Supertaster	Non Taster	CC	AA	TT	1	Non Taster	AVI	Female	19.65	0.80597	22	Sweet, Bitter	KP	154	27	33.5	46.6		KP
AYT240800530	Recessive Supertaster	Rare	CC	AG	TC	1	Rare	AAV/AVI	Female	21.95	0.883117	23	Pungent, Astringent	PV	158	34	38.5	54.8		PV
AYT240800607	Recessive Supertaster		CC		TT	1			Female	22.72	0.96	24	Sour, Salty, Pungent, Astringent, Sweet, Bitter	KP	166	36	37.5	62.6		KP
AYT231200170	Recessive Supertaster	Non Taster	CC	AA	TT	2	Non Taster	AVI	Female	20.86	0.945205	30	Sweet, Bitter	KP	165	34.5	36.5	56.8		KP
AYT240800608	Recessive Supertaster	Non Taster	CC	AA	TT	2	Non Taster	AVI	Male	27.87	0.879518	23	Sour, Salty, Sweet, Bitter	PV	173	36.5	41.5	83.4		PV
AYT240800571	Recessive Supertaster	Rare	CC	AG	TC	2	Rare	AAV/AVI	Female	24.92	0.763158	23	Pungent, Astringent	V	159	29	38	63		V
AYT240800564	Recessive Supertaster	Non Taster	CC	AA	TT	3	Non Taster	AVI	Male	24.58	0.890411	23	Sweet, Bitter	VK	168.5	32.5	36.5	69.8		VK
AYT240800606	Recessive Supertaster	Non Taster	CC	AA	TT	3	Non Taster	AVI	Female	17.16	0.916667	23	Sour, Salty	VK	155.5	27.5	30	41.5		VK
AYT231200128	Recessive Supertaster	Rare	CC	AG	TT	4	Rare	AAI/AVI	Female	18.22	0.857143	25	Sour, Salty	PV	163	30	35	48.4		PV
AYT231100078		Non Taster	CC	AA	TT		Non Taster	AVI	Female	22.07	0.833333	27	Sweet, Bitter	KP	152	30	36	51		KP
AYT231200183		Non Taster	CC	AA	TT		Non Taster	AVI	Female	23.18	0.934211	24	Pungent, Astringent	PV	156	35.5	38	56.4		PV
AYT231200222		Non Taster	CC	AA	TT		Non Taster	AVI	Female	21.79	0.825	28	Pungent, Astringent	VK	153	33	40	51		VK
AYT231200293		Non Taster	CC	AA	TT		Non Taster	AVI	Male	23.51	0.888889	24	Sweet, Bitter	KP	165	32	36	64		KP
AYT240100380		Non Taster	CC	AA	TT		Non Taster	AVI	Male	30.47	0.95122	27	Sweet, Bitter	KP	168	39	41	86		KP
AYT240100390		Rare	CC	AG	TC		Rare	AAV/AVI	Male	27.56	0.925	23	Sour, Salty	KP	177	37	40	86.35		KP
AYT240100382	Non Taster	Dominant Supertaster	GG	GG	CC	0	Dominant Supertaster	PAV	Female	29.07	0.95	29	Sour, Salty	VK	171	38	40	85		VK
AYT231200147	Recessive Supertaster	Dominant Supertaster	GG	GG	CC	3	Dominant Supertaster	PAV	Female	20.07	0.894737	28	Sour, Salty	VK	170	34	38	58		VK
AYT231200241	Recessive Supertaster	Dominant Supertaster	GG	GG	CC	3	Dominant Supertaster	PAV	Female	24.1	0.8875	30	Sweet, Bitter	KP	157	35.5	40	59.4		KP
AYT240800535	Recessive Supertaster	Dominant Supertaster	GG	GG	CC	3	Dominant Supertaster	PAV	Female	24.87	0.923077	24	Sweet, Bitter	KP	153.5	36	39	58.6		KP
AYT240900613	Recessive Supertaster	Dominant Supertaster	GG	GG	CC	3	Dominant Supertaster	PAV	Female	20.42	0.888889	22	Pungent, Astringent, Sweet, Bitter	KP	156	32	36	49.7		KP
AYT240800589	Recessive Supertaster	Dominant Supertaster	GG	GG	CC	4	Dominant Supertaster	PAV	Female	22.36	0.883117	22	Sweet, Bitter	KP	163	34	38.5	59.4		KP
AYT231200175	Dominant Supertaster	Dominant Supertaster	GG	GG	CC	5	Dominant Supertaster	PAV	Female	19.31	0.885714	26	Sweet, Bitter	PV	157	31	35	47.6		PV
AYT231200272	Dominant Supertaster	Dominant Supertaster	GG	GG	CC	5	Dominant Supertaster	PAV	Male	20.82	0.878788	22	Pungent, Astringent	KP	164	29	33	56		KP
AYT240100403	Dominant Supertaster	Dominant Supertaster	GG	GG	CC	5	Dominant Supertaster	PAV	Female	18.4	0.882353	21	Pungent, Astringent	PV	161	30	34	47.7		PV
AYT240800549	Dominant Supertaster	Dominant Supertaster	GG	GG	CC	5	Dominant Supertaster	PAV	Female	20.35	0.911765	23	Pungent, Astringent	KP	151.5	31	34	46.7		KP
AYT231200159		Dominant Supertaster	GG	GG	CC		Dominant Supertaster	PAV	Female	25.48	0.921053	27	Sour, Salty	VK	156	35	38	62		VK
AYT231200223		Dominant Supertaster	GG	GG	CC		Dominant Supertaster	PAV	Female	18.59	0.942857	27	Pungent, Astringent	VK	164	33	35	50		VK
AYT231200299	Non Taster	Rare	GC	GG	CC	0	Rare	PAV/AAV	Male	29.39	0.95122	36	Sour, Salty	VK	168	39	41	82.95		VK
AYT231100027	Non Taster	Recessive Supertaster	GC	AG	TC	0	Recessive Supertaster	PAV/AVI	Male	23.08	0.894737	26	Sweet, Bitter	P	185	34	38	79		P
AYT231200139	Non Taster	Recessive Supertaster	GC	AG	TC	0	Recessive Supertaster	PAV/AVI	Male	21.97	1.11667	26	Sweet, Bitter	KP	172	33.5	30	65		KP
AYT231200193	Non Taster	Recessive Supertaster	GC	AG	TC	0	Recessive Supertaster	PAV/AVI	Female	26.37	0.871795	29	Sweet, Bitter	VK	157	34	39	65		VK
AYT231200227	Non Taster	Recessive Supertaster	GC	AG	TC	0	Recessive Supertaster	PAV/AVI	Male	25.99	0.923077	18	Sour, Salty	KP	171	36	39	76		KP
AYT240100350	Non Taster	Recessive Supertaster	GC	AG	TC	0	Recessive Supertaster	PAV/AVI	Male	26.67	0.923077	28	Sweet, Bitter	K	171	36	39	78		K
AYT240100381	Non Taster	Recessive Supertaster	GC	AG	TC	0	Recessive Supertaster	PAV/AVI	Male	24.17	0.958333	30	Pungent, Astringent	KP	166.5	34.5	36	67		KP
AYT240100383	Non Taster	Recessive Supertaster	GC	AG	TC	0	Recessive Supertaster	PAV/AVI	Male	19.72	0.842857	32	Sour, Salty	VK	170	29.5	35	57		VK
AYT240800523	Non Taster	Recessive Supertaster	GC	AG	TC	0	Recessive Supertaster	PAV/AVI	Male	24.36	0.826667	22	Sweet, Bitter	KP	170	31	37.5	70.4		KP
AYT240900611	Non Taster	Recessive Supertaster	GC	AG	TC	0	Recessive Supertaster	PAV/AVI	Female	21.5	0.972222	22	Sour, Salty	VK	157	35	36	53		VK
AYT240800604	Recessive Supertaster	Rare	GC	AA	TT	1	Rare	PVI/AVI	Male	22.89	0.894737	23	Sweet, Bitter	KP	175	34	38	70.1		KP
AYT231200132	Recessive Supertaster	Recessive Supertaster	GC	AG	TC	1	Recessive Supertaster	PAV/AVI	Female	30.33	0.891304	28	Sweet, Bitter	KP	167	41	46	84.6		KP
AYT231200169	Recessive Supertaster	Recessive Supertaster	GC	AG	TC	1	Recessive Supertaster	PAV/AVI	Female	23.33	0.888889	25	Sweet, Bitter	KP	157	32	36	57.5		KP
AYT231200210	Recessive Supertaster	Recessive Supertaster	GC	AG	TC	1	Recessive Supertaster	PAV/AVI	Male	22.58	0.95	29	Pungent, Astringent	VK	194	38	40	85		VK
AYT231200229	Recessive Supertaster	Recessive Supertaster	GC	AG	TC	1	Recessive Supertaster	PAV/AVI	Male	23.8	0.921053	21	Sweet, Bitter	KP	179	35	38	76.25		KP
AYT231200234	Recessive Supertaster	Recessive Supertaster	GC	AG	TC	1	Recessive Supertaster	PAV/AVI	Male	24.97	0.907895	23	Pungent, Astringent	KP	167	34.5	38	69.65		KP
AYT231100026	Recessive Supertaster	Recessive Supertaster	GC	AG	TC	2	Recessive Supertaster	PAV/AVI	Female	16.49	0.833333	25	Sweet, Bitter	PV	167	30	36	46		PV
AYT231200154	Recessive Supertaster	Recessive Supertaster	GC	AG	TC	2	Recessive Supertaster	PAV/AVI	Male	22.59	0.971429	26	Sour, Salty	VK	167	34	35	63		VK
AYT231200213	Recessive Supertaster	Recessive Supertaster	GC	AG	TC	2	Recessive Supertaster	PAV/AVI	Female	20.17	0.842105	27	Sweet, Bitter	KP	151	32	38	46		KP
AYT231200224	Recessive Supertaster	Recessive Supertaster	GC	AG	TC	2	Recessive Supertaster	PAV/AVI	Male	20.68	0.944444	21	Sweet, Bitter	KP	180	34	36	67		KP
AYT240100352	Recessive Supertaster	Recessive Supertaster	GC	AG	TC	2	Recessive Supertaster	PAV/AVI	Male	24.72	0.958904	31	Sweet, Bitter	KP	173	35	36.5	74		KP
AYT240800533	Recessive Supertaster	Recessive Supertaster	GC	AG	TC	2	Recessive Supertaster	PAV/AVI	Female	20.84	0.921053	21	Sour, Salty, Pungent, Astringent	KP	162	35	38	54.7		KP
AYT240800558	Recessive Supertaster	Recessive Supertaster	GC	AG	TC	2	Recessive Supertaster	PAV/AVI	Female	21.7	0.849315	23	Sour, Salty	KP	154.5	31	36.5	51.8		KP
AYT240800579	Recessive Supertaster	Recessive Supertaster	GC	AG	TC	2	Recessive Supertaster	PAV/AVI	Female	23.16	0.914286	22	Sweet, Bitter	VK	145	32	35	48.7		VK
AYT240900619	Recessive Supertaster	Recessive Supertaster	GC	AG	TC	2	Recessive Supertaster	PAV/AVI	Female	20.83	0.945946	22	Sweet, Bitter	KP	158	35	37	52		KP
AYT240800577	Recessive Supertaster	Rare	GC	GG	CC	3	Rare	PAV/AAV	Female	26.31	0.841463	24	Pungent, Astringent	PV	154.5	34.5	41	62.8		PV
AYT231200131	Recessive Supertaster	Recessive Supertaster	GC	AG	TC	3	Recessive Supertaster	PAV/AVI	Female	22.52	0.878378	26	Pungent, Astringent	KP	155	32.5	37	54.1		KP
AYT231200133	Recessive Supertaster	Recessive Supertaster	GC	AG	TC	3	Recessive Supertaster	PAV/AVI	Female	27.18	0.97619	28	Pungent, Astringent	KP	165	41	42	74		KP
AYT231200230	Recessive Supertaster	Recessive Supertaster	GC	AG	TC	3	Recessive Supertaster	PAV/AVI	Male	28.95	0.95	21	Pungent, Astringent	KP	168	38	40	81.7		KP
AYT240100355	Recessive Supertaster	Recessive Supertaster	GC	AG	TC	3	Recessive Supertaster	PAV/AVI	Male	27.23	0.875	21	Sweet, Bitter	KP	173	35	40	81.5		KP
AYT240100378	Recessive Supertaster	Recessive Supertaster	GC	AG	TC	3	Recessive Supertaster	PAV/AVI	Female	20.98	0.858974	27	Sour, Salty	V	163	33.5	39	55.74		V
AYT240100405	Recessive Supertaster	Recessive Supertaster	GC	AG	TC	3	Recessive Supertaster	PAV/AVI	Female	21.97	0.868421	22	Sweet, Bitter	VK	168	33	38	62		VK
AYT240800524	Recessive Supertaster	Recessive Supertaster	GC	AG	TC	3	Recessive Supertaster	PAV/AVI	Male	27.73	0.878049	22	Pungent, Astringent, Sweet, Bitter	KP	173	36	41	83		KP
AYT240900614	Recessive Supertaster	Recessive Supertaster	GC	AG	TC	3	Recessive Supertaster	PAV/AVI	Female	20.26	0.789474	22	Sour, Salty	KP	164	30	38	54.5		KP
AYT231200142	Recessive Supertaster	Recessive Supertaster	GC	AG	TC	4	Recessive Supertaster	PAV/AVI	Female	22.55	0.942211	28	Sour, Salty	VK	159	37.5	39.8	57		VK
AYT231200149	Recessive Supertaster	Recessive Supertaster	GC	AG	TC	4	Recessive Supertaster	PAV/AVI	Female	19.31	0.882353	25	Sweet, Bitter	KP	156	30	34	47		KP
AYT231200182	Recessive Supertaster	Recessive Supertaster	GC	AG	TC	4	Recessive Supertaster	PAV/AVI	Male	23.03	0.894737	36	Pungent, Astringent	VK	166	34	38	63.45		VK
AYT231200185	Recessive Supertaster	Recessive Supertaster	GC	AG	TC	4	Recessive Supertaster	PAV/AVI	Female	21.15	0.902778	28	Sweet, Bitter	VK	154	32.5	36	50.15		VK
AYT231200221	Recessive Supertaster	Recessive Supertaster	GC	AG	TC	4	Recessive Supertaster	PAV/AVI	Female	21.48	0.8	26	Pungent, Astringent	KP	160	32	40	55		KP
AYT231200232	Recessive Supertaster	Recessive Supertaster	GC	AG	TC	4	Recessive Supertaster	PAV/AVI	Female	24.61	0.85	29	Sweet, Bitter	KP	160	34	40	63		KP
AYT231200237	Recessive Supertaster	Recessive Supertaster	GC	AG	TC	4	Recessive Supertaster	PAV/AVI	Male	28.37	0.9125	20	Sour, Salty	KP	174	36.5	40	85.9		KP
AYT240100391	Recessive Supertaster	Recessive Supertaster	GC	AG	TC	4	Recessive Supertaster	PAV/AVI	Female	18.44	0.861111	23	Pungent, Astringent	PV	163	31	36	49		PV
AYT240100415	Recessive Supertaster	Recessive Supertaster	GC	AG	TC	4	Recessive Supertaster	PAV/AVI	Female	22.91	0.884615	20	Sour, Salty	VK	155	34.5	39	55.05		VK
AYT240800559	Recessive Supertaster	Recessive Supertaster	GC	AG	TC	4	Recessive Supertaster	PAV/AVI	Female	19.2	0.941176	23	Sour, Salty, Pungent, Astringent	PV	162	32	34	50.4		PV
AYT240800574	Recessive Supertaster	Recessive Supertaster	GC	AG	TC	4	Recessive Supertaster	PAV/AVI	Female	17.31	0.878788	22	Sour, Salty	PV	163	29	33	46		PV
AYT240800587	Recessive Supertaster	Recessive Supertaster	GC	AG	TC	4	Recessive Supertaster	PAV/AVI	Female	15.74	0.9375	21	Pungent, Astringent, Sweet, Bitter	PV	157	30	32	38.8		PV
AYT240800600	Recessive Supertaster	Recessive Supertaster	GC	AG	TC	4	Recessive Supertaster	PAV/AVI	Male	21.14	0.857143	22	Pungent, Astringent	P	163.5	30	35	56.5		P
AYT240900618	Recessive Supertaster	Recessive Supertaster	GC	AG	TC	4	Recessive Supertaster	PAV/AVI	Female	20.18	0.861111	23	Sour, Salty	VK	161	31	36	52.3		VK
AYT240900630	Recessive Supertaster	Recessive Supertaster	GC	AG	TC	4	Recessive Supertaster	PAV/AVI	Female	18.03	0.888889	22	Sour, Salty	PV	162.5	32	36	47.6		PV
AYT231200184	Dominant Supertaster	Recessive Supertaster	GC	AG	TC	5	Recessive Supertaster	PAV/AVI	Female	18.62	0.942857	26	Sour, Salty	PV	154	33	35	44.15		PV
AYT240800539	Dominant Supertaster	Recessive Supertaster	GC	AG	TC	5	Recessive Supertaster	PAV/AVI	Female	20.62	0.869565	22	Pungent, Astringent	VK	150	30	34.5	46.4		VK
AYT240800555	Dominant Supertaster	Recessive Supertaster	GC	AG	TC	5	Recessive Supertaster	PAV/AVI	Female	23.06	0.918919	22	Sour, Salty, Sweet, Bitter	VK	155	34	37	55.4		VK
AYT240800563	Dominant Supertaster	Recessive Supertaster	GC	AG	TC	5	Recessive Supertaster	PAV/AVI	Male	18.09	0.9375	24	Sour, Salty	VK	171.5	30	32	53.2		VK
AYT240800590	Dominant Supertaster	Recessive Supertaster	GC	AG	TC	5	Recessive Supertaster	PAV/AVI	Female	17.51	0.907692	23	Sour, Salty	VK	153	29.5	32.5	41		VK
AYT240800591	Dominant Supertaster	Recessive Supertaster	GC	AG	TC	5	Recessive Supertaster	PAV/AVI	Female	17.4	0.955882	22	Sweet, Bitter	PV	161	32.5	34	45.1		PV
AYT240800599	Dominant Supertaster	Recessive Supertaster	GC	AG	TC	5	Recessive Supertaster	PAV/AVI	Female	24.03	0.985714	23	Pungent, Astringent, Sweet, Bitter	PV	158	34.5	35	60		PV
AYT231200162		Recessive Supertaster	GC	AG	TC		Recessive Supertaster	PAV/AVI	Female	27.04	1	43	Sweet, Bitter	VK	158	37	37	67.5		VK
AYT231200212		Recessive Supertaster	GC	AG	TC		Recessive Supertaster	PAV/AVI	Female	23.24	0.871795	26	Sweet, Bitter	VK	151	34	39	53		VK
AYT231200217		Recessive Supertaster	GC	AG	TC		Recessive Supertaster	PAV/AVI	Male	25.95	0.9	28	Sour, Salty	VK	170	36	40	75		VK
AYT231200228		Recessive Supertaster	GC	AG	TC		Recessive Supertaster	PAV/AVI	Male	23.81	0.931507	24	Sweet, Bitter	VK	169	34	36.5	68		VK
AYT231200236		Recessive Supertaster	GC	AG	TC		Recessive Supertaster	PAV/AVI	Female	20.28	0.902439	20	Sour, Salty	PV	172	37	41	60		PV
AYT231200267		Recessive Supertaster	GC	AG	TC		Recessive Supertaster	PAV/AVI	Male	18.78	0.923077	24	Sweet, Bitter	VK	168	30	32.5	53		VK
AYT240100396		Recessive Supertaster	GC	AG	TC		Recessive Supertaster	PAV/AVI	Female	21.67	0.888889	20	Sweet, Bitter	PV	154	32	36	51.4		PV
AYT240100416		Recessive Supertaster	GC	AG	TC		Recessive Supertaster	PAV/AVI	Female	15.36	1	19	Pungent, Astringent	PV	149	30.5	30.5	34.1		PV
AYT231200140	Non Taster					0			Male	23.51	0.944444	36	Sweet, Bitter	PV	165	34	36	64		PV
AYT240900623	Non Taster					0			Female	24.18	0.815789	23	Pungent, Astringent	KP	153	31	38	56.6		KP
AYT231200285	Recessive Supertaster					3			Male	20.28	0.897059	20	Pungent, Astringent	V	172	30.5	34	60		V
Average										23.4873	1.1665	27.7359			0	#N/A	#N/A	#N/A
															0	#N/A	#N/A	#N/A
															0	#N/A		#N/A
															0	#N/A		#N/A
															0	#N/A		#N/A
															0	#N/A		#N/A
															0	#N/A		#N/A
																#N/A		#N/A
																#N/A		#N/A
																#N/A		#N/A
																#N/A		#N/A
																#N/A		#N/A
																#N/A		#N/A
																		#N/A
																		#N/A
																		#N/A
																		#N/A
																		#N/A
																		#N/A
																		#N/A
																		#N/A
																		#N/A
																		#N/A
																		#N/A
																		#N/A
																		#N/A
																		#N/A
																		#N/A
																		#N/A
																		#N/A
																		#N/A
																		#N/A
																		#N/A
																		#N/A
																		#N/A
																		#N/A
																		#N/A
																		#N/A
																		#N/A
																		#N/A

## Sheet: Supp_Table_7
plant	PC1	PC2	pca_cluster	UMAP1	UMAP2	umap_cluster
Acacia catechu	-0.032061	-0.0463336	0	11.7492	-4.30698	-1
Acacia concinna	-0.0175119	-0.0311945	0	4.4035	-5.7706	-1
Acacia farnesiana	-0.0216531	-0.0274221	0	7.90865	-7.82813	-1
Acacia nilotica	-0.0249388	-0.0405504	0	8.36039	-6.95912	-1
Acacia sinuata	-0.0175119	-0.0311945	0	4.41232	-5.76238	-1
Acalypha indica	-0.0145616	-0.0281515	0	14.9612	-4.29093	-1
Acer oblongum	-0.0163809	-0.0364896	0	7.85567	-7.8829	-1
Adansonia digitata	-0.00765405	-0.0148645	0	4.79102	-4.72925	-1
Adenanthera pavonina	-0.0116296	-0.0222359	0	10.1654	-0.681897	-1
Aerva lanata	-0.0378909	-0.0686841	0	10.5433	-3.26522	-1
Aframomum melegueta	-0.0238811	-0.0148956	0	3.25122	-3.50804	-1
Ageratum conyzoides	-0.0257608	0.0192566	0	9.69818	-1.44937	-1
Agrimonia eupatoria	-0.0393477	-0.104911	0	13.1191	-5.09658	-1
Agrimonia pilosa	-0.0393477	-0.104911	0	13.1136	-5.1022	-1
Ailanthus altissima	0.0103753	-0.0161373	0	11.6428	-6.24932	-1
Alpinia japonica	-0.0333258	-0.0354883	0	6.58039	-14.0521	-1
Amberboa ramosa	-0.0065145	-0.0138372	0	11.1549	-1.67852	-1
Amomum subulatum	-0.0108368	-0.0219027	0	10.0798	-0.453575	-1
Anagallis arvensis	-0.0126051	-0.0280227	0	12.2255	-8.9109	-1
Anethum sowa	-0.0105316	-0.0208166	0	3.22177	-3.50514	-1
Arabidopsis thaliana	-0.0573259	-0.0775399	0	4.20176	-1.4069	-1
Arachis hypogaea	-0.0363286	-0.0512472	0	7.12311	-5.6565	-1
Arbutus unedo	-0.00955124	-0.0203822	0	9.84232	-3.39833	-1
Arctostaphylos uva-ursi	-0.0341989	-0.0496432	0	9.81926	-3.38236	-1
Areca catechu	-0.0141594	-0.0273309	0	8.94445	-4.22569	-1
Argyreia nervosa	-0.0305393	-0.0796906	0	13.1294	-5.13373	-1
Artemisia dracunculus	-0.0301631	0.0227398	0	10.3299	-1.80746	-1
Artocarpus heterophyllus	-0.0221141	-0.0335482	0	8.11808	-4.04172	-1
Atropa acuminata	-0.0281331	-0.0549952	0	4.40838	-5.76585	-1
Atropa belladonna	-0.0291091	-0.0474902	0	4.40058	-5.82457	-1
Avena sativa	-0.0211126	-0.0248791	0	5.22087	-5.4028	-1
Azadirachta indica	-0.0217013	-0.026288	0	9.29024	-6.49459	-1
Bacopa monnieri	-0.0166712	-0.032325	0	4.41	-5.81146	-1
Bassia scoparia	-0.0142438	-0.0184094	0	15.6241	-6.23196	-1
Beta vulgaris	-0.00742693	-0.0153784	0	9.03345	-3.48727	-1
Bischofia javanica	-0.0104211	-0.0203408	0	11.8623	-4.28736	-1
Bombax ceiba	-0.0163809	-0.0364896	0	7.9082	-7.82486	-1
Borago officinalis	-0.0168043	-0.0308139	0	9.54748	1.45016	-1
Brucea javanica	-0.0163809	-0.0364896	0	7.90006	-7.83354	-1
Brugmansia arborea	-0.0281331	-0.0549952	0	4.40888	-5.76716	-1
Buddleja asiatica	-0.0168043	-0.0308139	0	9.57502	1.45879	-1
Buddleja davidii	-0.0168043	-0.0308139	0	9.56993	1.45603	-1
Buddleja globosa	-0.0154007	-0.0263107	0	9.1088	-1.76787	-1
Buddleja officinalis	-0.0168043	-0.0308139	0	9.56843	1.437	-1
Caesalpinia pulcherrima	-0.0163809	-0.0364896	0	7.89775	-7.83409	-1
Cannabis sativa	-0.021237	-0.0251351	0	4.77852	-4.94974	-1
Capsicum annuum	-0.0317753	-0.0288558	0	6.32853	0.834227	-1
Carthamus tinctorius	-0.0345374	-0.11373	0	11.1105	9.95162	-1
Carya illinoinensis	-0.0226301	-0.0497744	0	6.58049	-14.0492	-1
Cassia javanica	-0.0316181	-0.0799822	0	10.0715	-0.438792	-1
Castanea sativa	-0.030901	-0.0565885	0	9.12472	-6.23593	-1
Cedrus libani	-0.0156195	-0.027492	0	14.9532	-4.2903	-1
Ceiba pentandra	-0.0168043	-0.0308139	0	9.56067	1.44549	-1
Centaurea behen	-0.0065145	-0.0138372	0	11.1574	-1.67614	-1
Centaurea calcitrapa	-0.0145577	-0.0389168	0	9.94309	1.85392	-1
Centaurea iberica	-0.00642629	-0.014443	0	9.94013	1.86789	-1
Ceratolimon feei	-0.0226301	-0.0497744	0	6.58502	-14.0438	-1
Ceriops tagal	-0.00889532	-0.0189546	0	14.9591	-4.29286	-1
Cestrum diurnum	-0.0175119	-0.0311945	0	4.42345	-5.75715	-1
Chamaecrista absus	-0.0573259	-0.0775399	0	4.18721	-1.39358	-1
Chromolaena odorata	-0.0272195	-0.0599618	0	10.1669	-0.461363	-1
Chrysanthemum indicum	-0.0150742	-0.0242078	0	9.48268	1.29785	-1
Chrysanthemum morifolium	-0.014931	-0.0277629	0	10.5348	-3.26442	-1
Cicer arietinum	-0.0524071	-0.0634156	0	10.0991	-1.25323	-1
Cinchona calisaya	-0.00845456	-0.01853	0	15.064	-4.20252	-1
Cinchona hybrida	-0.00831583	-0.0180553	0	15.0765	-4.19525	-1
Cinchona officinalis	-0.00831583	-0.0180553	0	15.0643	-4.20819	-1
Cinchona pubescens	-0.00914394	-0.0190359	0	15.0664	-4.20184	-1
Cinchona robusta	-0.00889532	-0.0189546	0	14.9451	-4.30879	-1
Cinnamomum porrectum	-0.0124561	-0.0233726	0	4.97696	-8.40214	-1
Cinnamomum verum	-0.0274179	0.0210988	0	5.45079	-3.72612	-1
Cirsium arvense	-0.0134547	-0.0260105	0	9.87704	1.80219	-1
Cirsium wallichii	-0.00642629	-0.014443	0	9.93058	1.85826	-1
Citrullus colocynthis	-0.0120985	-0.0269259	0	12.2424	-8.92911	-1
Clerodendrum indicum	-0.0345374	-0.11373	0	11.0991	9.95528	-1
Clerodendrum infortunatum	-0.0345374	-0.11373	0	11.1262	9.97446	-1
Clerodendrum phlomidis	-0.0345374	-0.11373	0	11.1393	9.98838	-1
Clerodendrum volubile	-0.0345374	-0.11373	0	11.1448	9.99309	-1
Clitoria ternatea	-0.0448913	-0.0651211	0	8.35603	-2.5659	-1
Coccinia grandis	-0.0122756	-0.0267922	0	12.1725	-8.7855	-1
Coix lacryma-jobi	-0.0089008	-0.0148367	0	8.24937	-2.54311	-1
Colophospermum mopane	-0.0104211	-0.0203408	0	11.8578	-4.26601	-1
Commiphora caudata	-0.0573259	-0.0775399	0	4.16362	-1.37044	-1
Corylus avellana	-0.0393477	-0.104911	0	13.1224	-5.103	-1
Corymbia citriodora	-0.0174606	-0.0201834	0	9.16857	-6.19263	-1
Corymbia maculata	-0.02165	-0.031104	0	5.04158	-8.31642	-1
Cotinus coggygria	-0.0174508	-0.0190386	0	11.2504	-3.04113	-1
Crotalaria madurensis	-0.0108368	-0.0219027	0	10.0784	-0.450328	-1
Cryptocarya wightiana	-0.0108368	-0.0219027	0	10.0775	-0.445681	-1
Cucumis melo	-0.024236	-0.0369339	0	12.2214	-8.90183	-1
Cucumis prophetarum	-0.0120653	-0.0264294	0	12.2164	-8.89484	-1
Cucurbita foetidissima	-0.0131343	-0.0290278	0	12.2081	-8.88456	-1
Curcuma longa	-0.0218733	-0.0161767	0	3.40651	-3.50306	-1
Cyamopsis tetragonoloba	-0.0573259	-0.0775399	0	4.21032	-1.41725	-1
Cyanus depressus	-0.0345374	-0.11373	0	11.1114	9.98792	-1
Cymbopogon citratus	-0.026816	0.0185358	0	5.02335	-8.31751	-1
Cymbopogon schoenanthus	-0.0124561	-0.0233726	0	4.97487	-8.40393	-1
Dactylis glomerata	-0.00849419	-0.0144378	0	8.20297	-1.86025	-1
Dalbergia spinosa	-0.0128505	-0.0165326	0	10.2441	-1.16268	-1
Datisca cannabina	-0.0108368	-0.0219027	0	10.0662	-0.433088	-1
Davidsonia pruriens	-0.0226301	-0.0497744	0	6.58023	-14.0513	-1
Delonix elata	-0.010008	-0.0138568	0	10.5523	-1.74372	-1
Delonix regia	-0.0393477	-0.104911	0	13.0908	-5.08042	-1
Dendrophthoe falcata	-0.0405476	-0.0589796	0	7.85578	-5.53087	-1
Dichroa febrifuga	-0.00889532	-0.0189546	0	14.9471	-4.30664	-1
Dicranopteris linearis	-0.0393477	-0.104911	0	13.129	-5.11261	-1
Digitalis lanata	-0.0345374	-0.11373	0	11.1256	9.97639	-1
Dolichandrone falcata	-0.014931	-0.0277629	0	10.5418	-3.28573	-1
Duboisia myoporoides	-0.0281331	-0.0549952	0	4.42022	-5.75738	-1
Duranta erecta	-0.0345374	-0.11373	0	11.1085	9.95085	-1
Ecballium elaterium	-0.0126051	-0.0280227	0	12.2286	-8.91132	-1
Eclipta prostrata	-0.0175119	-0.0311945	0	4.41096	-5.76435	-1
Eichhornia crassipes	-0.0573259	-0.0775399	0	4.21185	-1.41934	-1
Elaeagnus angustifolia	-0.0194964	-0.0316564	0	15.6611	-6.26513	-1
Elaeagnus rhamnoides	-0.0646378	-0.0987937	0	9.30298	-5.9905	-1
Elaeocarpus tuberculatus	-0.0163809	-0.0364896	0	7.90425	-7.82758	-1
Elettaria cardamomum	-0.0132049	0.00499846	0	6.66635	-4.05775	-1
Elsholtzia ciliata	-0.0168043	-0.0308139	0	9.5602	1.44514	-1
Entada rheedii	-0.00650035	-0.0142121	0	8.32225	-7.00765	-1
Ephedra equisetina	-0.00676851	-0.0140921	0	7.03592	-6.26836	-1
Ephedra gerardiana	-0.00676851	-0.0140921	0	7.05222	-6.28163	-1
Ephedra intermedia	-0.00676851	-0.0140921	0	7.03378	-6.26332	-1
Ephedra sinica	-0.0278872	-0.00943918	0	7.03251	-6.27479	-1
Epilobium angustifolium	-0.0152416	-0.0216867	0	10.4166	-1.80568	-1
Eranthemum roseum	-0.0573259	-0.0775399	0	4.18876	-1.39698	-1
Eriobotrya japonica	-0.0252027	-0.0473794	0	8.84499	-4.14237	-1
Eriophyton wallichii	-0.00715811	-0.0142041	0	6.27038	-4.31191	-1
Erythroxylum cuneatum	-0.0175119	-0.0311945	0	4.39711	-5.778	-1
Eucalyptus amplifolia	-0.0124561	-0.0233726	0	4.99859	-8.38021	-1
Eucalyptus camaldulensis	-0.0393477	-0.104911	0	13.1135	-5.09581	-1
Eucalyptus globulus	-0.0379219	-0.0545802	0	5.01164	-8.36117	-1
Eucalyptus grandis	-0.0124561	-0.0233726	0	4.98571	-8.39347	-1
Eucalyptus melliodora	-0.0124561	-0.0233726	0	4.98222	-8.3966	-1
Eucalyptus polyanthemos	-0.0124561	-0.0233726	0	4.98549	-8.39368	-1
Eucalyptus sideroxylon	-0.0124561	-0.0233726	0	4.97673	-8.40253	-1
Eucalyptus viminalis	-0.0124561	-0.0233726	0	4.97662	-8.40218	-1
Eugenia myrcianthes	-0.0226301	-0.0497744	0	6.58211	-14.05	-1
Euphorbia hirta	-0.0393477	-0.104911	0	13.1071	-5.09663	-1
Fagopyrum acutatum	-0.0102702	-0.0216871	0	8.86776	-4.17064	-1
Festuca arundinacea	-0.0573259	-0.0775399	0	4.20702	-1.41427	-1
Ficus lacor	-0.0345374	-0.11373	0	11.14	9.99104	-1
Firmiana colorata	-0.0345374	-0.11373	0	11.1242	9.97574	-1
Fumaria indica	-0.00089487	-0.00730285	0	10.4936	-2.62163	-1
Fumaria parviflora	-0.00089487	-0.00730285	0	10.5271	-2.61851	-1
Garcinia mangostana	-0.00472628	-0.0424881	0	8.91186	-4.2194	-1
Gentiana spicata	-0.0226301	-0.0497744	0	6.5782	-14.0541	-1
Geum urbanum	-0.00642629	-0.014443	0	9.94139	1.87104	-1
Ginkgo biloba	-0.045402	-0.0730506	0	9.83101	-5.10474	-1
Glinus lotoides	-0.0114834	-0.0181401	0	11.1292	-2.69485	-1
Gmelina arborea	-0.00975939	-0.0173206	0	7.7777	-5.49464	-1
Gmelina asiatica	-0.00950358	-0.0202637	0	7.88129	-5.56213	-1
Grangea maderaspatana	-0.0345374	-0.11373	0	11.1561	9.94921	-1
Grewia asiatica	-0.0296067	-0.0469068	0	9.51839	-3.93801	-1
Grewia villosa	-0.00981225	-0.0197031	0	15.6529	-6.26493	-1
Guiera senegalensis	-0.0226301	-0.0497744	0	6.58033	-14.0511	-1
Haldina cordifolia	-0.014931	-0.0277629	0	10.5381	-3.25861	-1
Haloxylon salicornicum	-0.00765405	-0.0148645	0	4.78849	-4.73424	-1
Harpephyllum caffrum	-0.0393477	-0.104911	0	13.1154	-5.09902	-1
Hedychium spicatum	-0.014931	-0.0277629	0	10.5367	-3.276	-1
Helianthemum glomeratum	-0.0226301	-0.0497744	0	6.56859	-14.0637	-1
Helianthus tuberosus	-0.0102296	-0.0192334	0	9.30434	-6.4896	-1
Heliotropium eichwaldii	-0.0124561	-0.0233726	0	4.98447	-8.39416	-1
Heliotropium ellipticum	-0.0124561	-0.0233726	0	4.95966	-8.41353	-1
Heliotropium lasiocarpum	-0.0124561	-0.0233726	0	4.98105	-8.39774	-1
Hemidesmus indicus	-0.0573259	-0.0775399	0	4.21451	-1.42179	-1
Hibiscus cannabinus	-0.0393477	-0.104911	0	13.1589	-5.14161	-1
Hibiscus rosa-sinensis	-0.00650035	-0.0142121	0	8.32284	-7.00787	-1
Hippochaete debilis	-0.0175119	-0.0311945	0	4.40986	-5.76245	-1
Holigarna arnottiana	-0.0163809	-0.0364896	0	7.91671	-7.8164	-1
Hygroryza aristata	-0.0226301	-0.0497744	0	6.57931	-14.0529	-1
Iberis amara	-0.00885348	-0.019946	0	12.2299	-8.91323	-1
Iberis coronaria	-0.00885348	-0.019946	0	12.2298	-8.91448	-1
Impatiens balsamina	-0.0244409	-0.0553362	0	11.6439	-6.24751	-1
Indigofera oblongifolia	-0.00799724	-0.00889353	0	11.0979	-2.64304	-1
Inula grantioides	0.0103753	-0.0161373	0	11.6432	-6.24929	-1
Ipomoea carnea	-0.0573259	-0.0775399	0	4.21876	-1.42516	-1
Iris milesii	-0.0128505	-0.0165326	0	10.2519	-1.15857	-1
Ixora coccinea	0.0103753	-0.0161373	0	11.6427	-6.2473	-1
Jacaranda acutifolia	-0.0345374	-0.11373	0	11.1255	9.97332	-1
Jacaranda mimosifolia	-0.0345374	-0.11373	0	11.122	9.97015	-1
Jasminum grandiflorum	-0.0134501	-0.012601	0	9.17788	-2.23834	-1
Lactuca sativa	-0.0147672	-0.0264461	0	7.88619	-5.55024	-1
Lagenaria siceraria	-0.0297867	-0.0562792	0	12.1928	-8.86762	-1
Lagerstroemia speciosa	-0.00835032	-0.0171748	0	9.17993	-6.22372	-1
Laphangium luteoalbum	-0.0108368	-0.0219027	0	10.0786	-0.452525	-1
Lawsonia inermis	-0.0220417	-0.0176573	0	10.158	-0.620501	-1
Leucaena leucocephala	-0.00950358	-0.0202637	0	7.87734	-5.5694	-1
Leucas aspera	-0.0166708	-0.033973	0	4.40948	-5.76647	-1
Ligustrum lucidum	-0.0132658	-0.022959	0	9.28291	-2.19012	-1
Ligustrum vulgare	-0.00707455	-0.0146235	0	9.2581	-2.17902	-1
Limonium sinense	-0.0226301	-0.0497744	0	6.56726	-14.065	-1
Lotus corniculatus	-0.0311687	-0.0784085	0	12.0679	-4.4119	-1
Ludwigia adscendens	-0.00759639	-0.0163466	0	9.97012	-5.44256	-1
Luffa acutangula	-0.0297867	-0.0562792	0	12.1808	-8.85552	-1
Luffa cylindrica	-0.0129922	-0.0287143	0	12.1628	-8.85405	-1
Luffa echinata	-0.0129922	-0.0287143	0	12.2142	-8.8263	-1
Luffa graveolens	-0.0129922	-0.0287143	0	12.1855	-8.85839	-1
Lumnitzera racemosa	-0.00844419	-0.0176947	0	9.2542	-6.20015	-1
Lycopodium clavatum	-0.0175119	-0.0311945	0	4.41953	-5.75598	-1
Magnolia officinalis	-0.0226301	-0.0497744	0	6.57862	-14.0536	-1
Mammea suriga	-0.0393477	-0.104911	0	13.1514	-5.06415	-1
Manilkara zapota	-0.00915067	-0.0171513	0	8.8778	-3.2528	-1
Marrubium vulgare	-0.0244673	-0.0753724	0	11.106	9.89821	-1
Martynia annua	-0.0573259	-0.0775399	0	4.20168	-1.40974	-1
Matricaria chamomilla	-0.0324357	-0.0187971	0	10.861	-2.64104	-1
Mentha arvensis	-0.017894	-0.0178404	0	10.3959	-1.82548	-1
Mikania cordata	-0.00889532	-0.0189546	0	14.9297	-4.32321	-1
Millingtonia hortensis	-0.0345374	-0.11373	0	11.1151	9.98492	-1
Mimosa hamata	-0.0163809	-0.0364896	0	7.91055	-7.82214	-1
Mimusops elengi	-0.0285835	-0.00890956	0	10.1038	-5.42897	-1
Momordica dioica	-0.0384859	-0.0491432	0	10.0837	-0.452509	-1
Morinda citrifolia	-0.0511803	-0.0662975	0	4.335	-1.50543	-1
Mucuna pruriens	-0.0389705	-0.0279874	0	4.42858	-5.74653	-1
Myrica esculenta	-0.00835032	-0.0171748	0	9.18993	-6.23209	-1
Myristica fragrans	-0.0573259	-0.0775399	0	4.19137	-1.42998	-1
Myristica malabarica	-0.0128505	-0.0165326	0	10.2564	-1.155	-1
Myrsine africana	-0.0226301	-0.0497744	0	6.57639	-14.0555	-1
Nicotiana rustica	-0.0175119	-0.0311945	0	4.42355	-5.77757	-1
Nicotiana tabacum	-0.0203771	-0.0331566	0	4.72398	-5.07928	-1
Nigella sativa	-0.0117729	-0.0214282	0	8.97218	-3.553	-1
Nymphaea odorata	-0.0278554	-0.0721556	0	10.1124	-5.45163	-1
Ocimum americanum	-0.0393477	-0.104911	0	13.1289	-5.10511	-1
Okoubaka aubrevillei	-0.0226301	-0.0497744	0	6.57836	-14.0539	-1
Onychium siliculosum	-0.00707455	-0.0146235	0	9.24866	-2.1536	-1
Operculina turpethum	-0.0573259	-0.0775399	0	4.17534	-1.38448	-1
Opuntia dillenii	-0.0162482	-0.0564789	0	11.6443	-6.2518	-1
Origanum majorana	-0.0201061	-0.016103	0	9.83477	-3.37351	-1
Paeonia emodi	-0.0163809	-0.0364896	0	7.90075	-7.8242	-1
Panax ginseng	-0.0187712	-0.0307719	0	8.61496	-2.12355	-1
Papaver rhoeas	0.00260572	-0.0109008	0	10.4208	-2.56238	-1
Papaver somniferum	0.391185	0.0277549	0	10.3326	-2.5449	-1
Passiflora calcarata	-0.00981225	-0.0197031	0	15.6541	-6.26011	-1
Passiflora edulis	-0.0230991	-0.0142091	0	15.6686	-6.27232	-1
Passiflora foetida	-0.00981225	-0.0197031	0	15.66	-6.2653	-1
Passiflora subpeltata	-0.00981225	-0.0197031	0	15.6744	-6.27988	-1
Peganum harmala	-0.00981225	-0.0197031	0	15.66	-6.26565	-1
Pentanema indicum	-0.0105316	-0.0208166	0	3.23607	-3.49438	-1
Persicaria bistorta	-0.0432664	-0.0614819	0	9.47836	1.34904	-1
Phyllanthus emblica	-0.025378	-0.056179	0	7.89073	-7.84503	-1
Picrorhiza kurroa	-0.0134719	-0.0293973	0	12.2259	-8.90988	-1
Pinus pinaster	-0.00724911	-0.0105528	0	7.29894	-5.15132	-1
Piper argyrophyllum	-0.0105316	-0.0208166	0	3.24151	-3.50047	-1
Piper attenuatum	-0.0105316	-0.0208166	0	3.23349	-3.49727	-1
Piper bantamense	-0.0105316	-0.0208166	0	3.23272	-3.49722	-1
Piper cubeba	-0.011331	-0.0141222	0	4.77482	-4.62196	-1
Piper longum	-0.0105316	-0.0208166	0	3.22943	-3.49237	-1
Piper nigrum	-0.0216207	-0.00490198	0	4.55325	-4.36894	-1
Piper peepuloides	-0.0105316	-0.0208166	0	3.23291	-3.49649	-1
Piper retrofractum	-0.0105316	-0.0208166	0	3.2184	-3.48358	-1
Piper sylvaticum	-0.0105316	-0.0208166	0	3.23158	-3.49611	-1
Piper trioicum	-0.0105316	-0.0208166	0	3.21607	-3.49548	-1
Piper wallichii	-0.0105316	-0.0208166	0	3.23222	-3.49597	-1
Pithecellobium dulce	-0.0393477	-0.104911	0	13.1296	-5.10425	-1
Poeciloneuron indicum	-0.0163809	-0.0364896	0	7.93991	-7.79265	-1
Polianthes tuberosa	-0.017407	-0.014777	0	5.00327	-8.37638	-1
Polygala arvensis	-0.0393477	-0.104911	0	13.1173	-5.09391	-1
Polygala chinensis	-0.0393477	-0.104911	0	13.0746	-5.05404	-1
Polygala sibirica	-0.0168043	-0.0308139	0	9.56042	1.44464	-1
Primula macrophylla	-0.00701564	-0.0147429	0	7.05478	-5.64351	-1
Prunus avium	-0.0484978	-0.0536646	0	11.5821	-3.5462	-1
Prunus persica	-0.0398629	-0.0674761	0	8.00703	-3.98958	-1
Pulicaria dysenterica	-0.027082	-0.082937	0	7.87171	-5.54208	-1
Punica granatum	-0.0233429	-0.0381024	0	9.6153	-6.19483	-1
Quercus robur	-0.0333412	-0.049202	0	9.27025	-6.45152	-1
Rauvolfia serpentina	-0.0051249	-0.0147235	0	10.4457	-2.7289	-1
Rauvolfia tetraphylla	-0.00598174	-0.0132494	0	15.0675	-4.19885	-1
Rheum webbianum	-0.00089487	-0.00730285	0	10.5225	-2.62626	-1
Rhizophora mucronata	-0.0573259	-0.0775399	0	4.2129	-1.42053	-1
Rhodiola fastigiata	-0.0163809	-0.0364896	0	7.95822	-7.77496	-1
Rhodiola heterodonta	-0.0226301	-0.0497744	0	6.57881	-14.0527	-1
Rhodiola himalensis	-0.0163809	-0.0364896	0	7.92504	-7.79856	-1
Rhodiola sacra	-0.0229297	-0.0476998	0	7.83333	-7.87626	-1
Rhodiola sinuata	-0.00867348	-0.0143415	0	9.04672	-1.87632	-1
Rhododendron ponticum	-0.0211007	-0.0271431	0	9.84192	-3.4238	-1
Rhus parviflora	-0.0393477	-0.104911	0	13.1083	-5.09274	-1
Rhus succedanea	-0.0117716	-0.0138623	0	11.2366	-2.88476	-1
Ribes rubrum	-0.0149054	-0.0436793	0	11.4572	-5.97694	-1
Robinia pseudoacacia	-0.0232104	-0.0283853	0	6.74042	-5.33812	-1
Rosa canina	-0.0138595	-0.0256797	0	8.82478	-4.12621	-1
Rosa multiflora	-0.0393477	-0.104911	0	13.1561	-5.13227	-1
Rubus plicatus	-0.0195707	-0.0368344	0	9.80031	-3.36462	-1
Rumex conglomeratus	-0.0152416	-0.0216867	0	10.4092	-1.81336	-1
Salvia nemorosa	-0.0102296	-0.0192334	0	9.30398	-6.48939	-1
Salvia pratensis	-0.0102296	-0.0192334	0	9.30303	-6.48997	-1
Salvia sclarea	-0.0102296	-0.0192334	0	9.3035	-6.49377	-1
Santalum album	-0.00420532	-0.0129199	0	5.32657	-3.82323	-1
Santolina chamaecyparissus	-0.0164218	-0.0170068	0	10.6977	-3.96724	-1
Sapindus mukorossi	-0.00889532	-0.0189546	0	14.9431	-4.31289	-1
Saraca asoca	-0.0102702	-0.0216871	0	8.85793	-4.16625	-1
Sarcandra glabra	-0.0102702	-0.0216871	0	8.84466	-4.15137	-1
Scoparia dulcis	-0.0337675	-0.0956688	0	9.56126	1.45168	-1
Sedum ewersii	-0.00955124	-0.0203822	0	9.83639	-3.39055	-1
Sedum roseum	-0.0226301	-0.0497744	0	6.57494	-14.0566	-1
Senna auriculata	-0.00650035	-0.0142121	0	8.32354	-7.00827	-1
Senna occidentalis	-0.0175385	-0.0176475	0	14.9562	-4.29912	-1
Senna tora	-0.00742693	-0.0153784	0	9.02431	-3.48453	-1
Shorea robusta	-0.0108368	-0.0219027	0	10.0812	-0.451383	-1
Sida cordata	-0.00689515	-0.0147053	0	7.03445	-6.25451	-1
Sida cordifolia	-0.00689515	-0.0147053	0	7.03683	-6.26562	-1
Sida rhombifolia	-0.00600684	-0.0132955	0	7.03971	-6.20666	-1
Sida spinosa	-0.00689515	-0.0147053	0	7.03126	-6.23867	-1
Silybum marianum	-0.0367605	-0.0834314	0	9.109	-3.53832	-1
Solanum anguivi	-0.00945599	-0.0188244	0	6.32689	0.840269	-1
Solanum dubium	-0.00938541	-0.0185034	0	6.32262	0.845341	-1
Solanum dulcamara	-0.0191546	-0.0392628	0	6.33013	0.834916	-1
Solanum erianthum	-0.00945599	-0.0188244	0	6.32678	0.840696	-1
Solanum ferox	-0.00938541	-0.0185034	0	6.30291	0.828479	-1
Solanum indicum	-0.00945599	-0.0188244	0	6.32508	0.840653	-1
Solanum melongena	-0.0250759	-0.0320702	0	6.30392	0.861896	-1
Solanum stramoniifolium	-0.00938541	-0.0185034	0	6.32052	0.845726	-1
Solanum trilobatum	-0.00938541	-0.0185034	0	6.32065	0.845986	-1
Solanum tuberosum	-0.0331036	-0.0502473	0	6.3529	0.812803	-1
Sonchus arvensis	-0.0168043	-0.0308139	0	9.55733	1.44202	-1
Sorbaria tomentosa	-0.0321014	-0.0921104	0	9.84624	-3.41877	-1
Stachytarpheta jamaicensis	-0.0345374	-0.11373	0	11.1221	9.9861	-1
Sterculia foetida	-0.0345374	-0.11373	0	11.1451	9.98354	-1
Stereospermum chelonoides	-0.0345374	-0.11373	0	11.1384	9.98747	-1
Styrax officinalis	-0.0124561	-0.0233726	0	4.99308	-8.38542	-1
Swertia paniculata	-0.00799724	-0.00889353	0	11.0963	-2.64269	-1
Symplocos racemosa	-0.00981225	-0.0197031	0	15.6443	-6.25044	-1
Syzygium cumini	-0.0307104	-0.0584819	0	9.14355	-6.64106	-1
Syzygium nervosum	-0.0163809	-0.0364896	0	7.93312	-7.79977	-1
Syzygium samarangense	-0.0226301	-0.0497744	0	6.57266	-14.0579	-1
Tabernaemontana divaricata	-0.0573259	-0.0775399	0	4.2181	-1.39737	-1
Tagetes erecta	-0.0236962	-0.0393057	0	7.87435	-5.80246	-1
Tarenna asiatica	-0.00701564	-0.0147429	0	7.05709	-5.64716	-1
Tephrosia purpurea	-0.00650035	-0.0142121	0	8.32476	-7.00493	-1
Terminalia bellirica	-0.0163809	-0.0364896	0	7.91043	-7.82177	-1
Terminalia catappa	-0.00663592	-0.0144807	0	9.53582	-6.12559	-1
Terminalia chebula	-0.0133811	-0.0296611	0	8.09368	-7.64332	-1
Tetradium glabrifolium	-0.0349889	0.0484249	0	12.4718	-1.12543	-1
Tetradium ruticarpum	-0.0267103	0.100128	0	12.6106	-1.17731	-1
Teucrium chamaedrys	-0.0125653	0.00903173	0	6.31132	-4.26956	-1
Thuja occidentalis	-0.0393477	-0.104911	0	13.0919	-5.07385	-1
Tilia cordata	-0.0188745	-0.00330395	0	6.72622	-5.34475	-1
Trachyspermum ammi	-0.0149257	-0.0145249	0	6.89853	-5.53727	-1
Tragopogon orientalis	-0.0573259	-0.0775399	0	4.19284	-1.40123	-1
Tribulus terrestris	-0.00981225	-0.0197031	0	15.6739	-6.27938	-1
Tricholepis glaberrima	-0.0065145	-0.0138372	0	11.154	-1.67151	-1
Trichosanthes cucumerina	-0.0129922	-0.0287143	0	12.1752	-8.84784	-1
Trichosanthes tricuspidata	-0.0120653	-0.0264294	0	12.2132	-8.89358	-1
Verbena officinalis	-0.0089008	-0.0148367	0	8.23298	-2.55523	-1
Viburnum opulus	-0.00955124	-0.0203822	0	9.8515	-3.39998	-1
Vigna angularis	-0.0195016	-0.0228883	0	9.2491	-4.37981	-1
Viola tricolor	-0.0573259	-0.0775399	0	4.18058	-1.38654	-1
Volkameria inermis	-0.0345374	-0.11373	0	11.1534	9.99298	-1
Withania somnifera	-0.0175119	-0.0311945	0	4.4126	-5.76422	-1
Woodfordia floribunda	-0.00759639	-0.0163466	0	9.98366	-5.45006	-1
Woodfordia fruticosa	-0.0168246	-0.031937	0	9.88204	-5.45542	-1
Ziziphora clinopodioides	-0.0196583	0.000656852	0	9.55166	1.41454	-1
Ziziphus rugosa	-0.0393477	-0.104911	0	13.1222	-5.09926	-1
Aconitum chasmanthum	0.033544	-0.00982143	0	-5.74422	1.93196	0
Aconitum heterophyllum	0.033544	-0.00982143	0	-5.72809	1.94676	0
Aloe christianii	-0.00673177	-0.0151729	0	-1.90887	0.215799	0
Aloe ferox	-0.00673177	-0.0151729	0	-1.90893	0.215849	0
Aloe perryi	-0.00673177	-0.0151729	0	-1.90893	0.215841	0
Aloe succotrina	-0.00673177	-0.0151729	0	-1.90896	0.215845	0
Aloe vera	-0.00673177	-0.0151729	0	-1.90884	0.216438	0
Cassia fistula	-0.00974047	-0.0211281	0	-1.90833	0.215608	0
Crotalaria juncea	-0.0297243	-0.0166695	0	-8.79926	-0.600853	0
Crotalaria micans	-0.00789491	-0.016054	0	-8.80258	-0.601397	0
Delphinium caeruleum	0.033544	-0.00982143	0	-5.72817	1.94674	0
Delphinium semibarbatum	0.033544	-0.00982143	0	-5.72866	1.94644	0
Delphinium vestitum	0.033544	-0.00982143	0	-5.72827	1.94666	0
Delphinium zalil	0.033544	-0.00982143	0	-5.72852	1.94648	0
Emilia sonchifolia	-0.00789491	-0.016054	0	-8.80257	-0.601406	0
Frangula purshiana	-0.00673177	-0.0151729	0	-1.90889	0.215825	0
Senecio aureus	-0.00789491	-0.016054	0	-8.8023	-0.601353	0
Senecio scandens	-0.0148084	-0.0276135	0	-8.80271	-0.60146	0
Senecio tenuifolius	-0.00789491	-0.016054	0	-8.8025	-0.601385	0
Senecio vulgaris	-0.00789491	-0.016054	0	-8.80269	-0.601453	0
Tussilago farfara	-0.00789491	-0.016054	0	-8.80613	-0.602145	0
Centella asiatica	-0.0244957	-0.00385076	0	14.9261	7.66562	1
Hamelia patens	-0.0193381	-0.00222765	0	14.963	7.64021	1
Heliotropium indicum	-0.0244957	-0.00385076	0	14.961	7.63279	1
Hydrilla verticillata	-0.0244957	-0.00385076	0	14.9365	7.65606	1
Hyptis capitata	-0.0244957	-0.00385076	0	14.9312	7.66187	1
Incarvillea emodi	-0.00883636	-0.018247	0	15.6808	9.94933	1
Lamium album	-0.0336336	0.0114899	0	15.6751	9.94253	1
Lavandula stoechas	-0.0182506	-0.00864706	0	14.9059	7.59332	1
Lithospermum officinale	-0.0244957	-0.00385076	0	14.9404	7.65246	1
Lycopus europaeus	-0.0244957	-0.00385076	0	14.963	7.63061	1
Momordica balsamina	-0.0244957	-0.00385076	0	15.0004	7.59212	1
Ocimum tenuiflorum	-0.0244957	-0.00385076	0	14.9486	7.64562	1
Orthosiphon aristatus	-0.0220368	0.00640555	0	14.9603	7.6346	1
Picrorhiza kurrooa	-0.00883636	-0.018247	0	15.6759	9.94681	1
Plectranthus scutellarioides	-0.0244957	-0.00385076	0	14.9748	7.61841	1
Radermachera sinica	-0.00883636	-0.018247	0	15.6781	9.9509	1
Sanicula europaea	-0.0244957	-0.00385076	0	14.9668	7.62568	1
Symphytum officinale	-0.0244957	-0.00385076	0	14.9618	7.63101	1
Veronica anagallis-aquatica	-0.00883636	-0.018247	0	15.6755	9.9457	1
Veronica cuneifolia	-0.00883636	-0.018247	0	15.6757	9.94597	1
Veronica hederifolia	-0.00883636	-0.018247	0	15.6575	9.92777	1
Veronica pectinata	-0.00883636	-0.018247	0	15.6619	9.93216	1
Veronica peregrina	-0.00883636	-0.018247	0	15.6748	9.94497	1
Veronica persica	-0.00883636	-0.018247	0	15.6746	9.94464	1
Abelmoschus manihot	-0.00513465	-0.0112219	0	17.1009	14.7572	2
Abies alba	-0.00513465	-0.0112219	0	16.8793	14.7405	2
Abies balsamea	-0.00513465	-0.0112219	0	17.1179	14.7964	2
Abies grandis	-0.00513465	-0.0112219	0	16.871	14.5134	2
Abies nephrolepis	-0.00513465	-0.0112219	0	16.9062	14.7176	2
Abies spectabilis	-0.00513465	-0.0112219	0	16.7601	14.7173	2
Abroma augusta	-0.00513465	-0.0112219	0	17.1147	14.8444	2
Abutilon indicum	-0.00513465	-0.0112219	0	17.0191	14.786	2
Abutilon pannosum	-0.00513465	-0.0112219	0	17.2833	14.6849	2
Abutilon ramosum	-0.00513465	-0.0112219	0	17.1701	14.7066	2
Abutilon theophrasti	-0.00513465	-0.0112219	0	17.0741	14.7888	2
Acacia auriculiformis	-0.00513465	-0.0112219	0	17.1377	14.6927	2
Acacia caesia	-0.00513465	-0.0112219	0	17.1758	14.6241	2
Acacia dealbata	-0.00513465	-0.0112219	0	17.1281	14.5652	2
Acacia decurrens	-0.00513465	-0.0112219	0	17.1099	14.7208	2
Acacia ferruginea	-0.00513465	-0.0112219	0	17.1685	14.5626	2
Acacia lenticularis	-0.00513465	-0.0112219	0	17.1934	14.7632	2
Acacia leucophloea	-0.00513465	-0.0112219	0	17.3442	14.4932	2
Acacia mearnsii	-0.00513465	-0.0112219	0	17.2586	14.5139	2
Acacia melanoxylon	-0.00513465	-0.0112219	0	17.0428	14.7243	2
Acacia modesta	-0.00513465	-0.0112219	0	17.2072	14.6352	2
Acacia pennata	-0.00513465	-0.0112219	0	17.2797	14.5957	2
Acacia planifrons	-0.00513465	-0.0112219	0	17.0325	14.7319	2
Acacia polyacantha	-0.00513465	-0.0112219	0	17.0664	14.568	2
Acacia senegal	-0.00513465	-0.0112219	0	17.1236	14.6041	2
Acacia torta	-0.00513465	-0.0112219	0	17.3227	14.6148	2
Acalypha australis	-0.00513465	-0.0112219	0	17.3262	14.5934	2
Acalypha fruticosa	-0.00513465	-0.0112219	0	17.2779	14.5918	2
Acalypha hispida	-0.00513465	-0.0112219	0	17.268	14.5716	2
Acanthospermum hispidum	-0.00513465	-0.0112219	0	17.1993	14.5121	2
Acca sellowiana	-0.00513465	-0.0112219	0	17.2232	14.5708	2
Acer pictum	-0.00513465	-0.0112219	0	17.2784	14.5472	2
Achyranthes bidentata	-0.00513465	-0.0112219	0	17.2198	14.522	2
Acinos alpinus	-0.00513465	-0.0112219	0	17.0796	14.6295	2
Acmella oleracea	-0.00513465	-0.0112219	0	17.2555	14.4619	2
Acmella paniculata	-0.00513465	-0.0112219	0	17.3029	14.5275	2
Acokanthera oblongifolia	-0.00513465	-0.0112219	0	17.1809	14.6231	2
Acomastylis elata	-0.00513465	-0.0112219	0	17.2239	14.4873	2
Aconitum ferox	-0.00513465	-0.0112219	0	17.1628	14.5554	2
Aconitum napellus	-0.00513465	-0.0112219	0	17.229	14.5419	2
Aconitum palmatum	-0.00513465	-0.0112219	0	17.2446	14.4317	2
Acrocarpus fraxinifolius	-0.00513465	-0.0112219	0	17.2135	14.389	2
Acronychia pedunculata	-0.00513465	-0.0112219	0	17.2329	14.487	2
Actaea cimicifuga	-0.00513465	-0.0112219	0	17.2317	14.523	2
Actaea racemosa	-0.00513465	-0.0112219	0	17.3056	14.3251	2
Actaea spicata	-0.00513465	-0.0112219	0	17.3471	14.4535	2
Actiniopteris australis	-0.00513465	-0.0112219	0	17.1809	14.4311	2
Actiniopteris dichotoma	-0.00513465	-0.0112219	0	17.2059	14.4326	2
Actiniopteris radiata	-0.00513465	-0.0112219	0	17.2311	14.4	2
Actinodaphne gullavara	-0.00513465	-0.0112219	0	17.1582	14.3954	2
Actinodaphne hookeri	-0.00513465	-0.0112219	0	17.1891	14.5265	2
Actinoscirpus grossus	-0.00513465	-0.0112219	0	17.2423	14.4554	2
Adenosma indianum	-0.00513465	-0.0112219	0	17.1295	14.5601	2
Adiantum caudatum	-0.00513465	-0.0112219	0	17.2085	14.3431	2
Adiantum incisum	-0.00513465	-0.0112219	0	17.1276	14.3849	2
Adiantum venustum	-0.00513465	-0.0112219	0	17.1476	14.4338	2
Aegialitis rotundifolia	-0.00513465	-0.0112219	0	17.1869	14.4056	2
Aegiceras corniculatum	-0.00513465	-0.0112219	0	17.1747	14.4057	2
Aeollanthus pubescens	-0.00513465	-0.0112219	0	17.0831	14.3205	2
Aerva javanica	-0.00513465	-0.0112219	0	17.1998	14.3756	2
Aeschynomene brasiliana	-0.00513465	-0.0112219	0	17.088	14.3768	2
Aesculus assamica	-0.00513465	-0.0112219	0	17.1409	14.3569	2
Aganosma dichotoma	-0.00513465	-0.0112219	0	17.1776	14.3603	2
Agastache mexicana	-0.00513465	-0.0112219	0	17.146	14.3247	2
Agastache rugosa	-0.00513465	-0.0112219	0	17.177	14.3475	2
Agave americana	-0.00513465	-0.0112219	0	17.1297	14.3503	2
Agave cantala	-0.00513465	-0.0112219	0	17.1573	14.3221	2
Agave vivipara	-0.00513465	-0.0112219	0	17.1762	14.2554	2
Ageratina adenophora	-0.00513465	-0.0112219	0	17.1677	14.3612	2
Ageratum houstonianum	-0.00513465	-0.0112219	0	17.1267	14.4516	2
Aglaia odorata	-0.00513465	-0.0112219	0	17.0318	14.3793	2
Aglaonema commutatum	-0.00513465	-0.0112219	0	17.0779	14.2481	2
Agrostemma githago	-0.00513465	-0.0112219	0	17.0908	14.3154	2
Ailanthus excelsa	-0.00513465	-0.0112219	0	17.156	14.2898	2
Ailanthus triphysa	-0.00513465	-0.0112219	0	17.0931	14.2199	2
Ajania fruticulosa	-0.00513465	-0.0112219	0	17.0981	14.2573	2
Ajuga integrifolia	-0.00513465	-0.0112219	0	17.0681	14.2715	2
Ajuga lupulina	-0.00513465	-0.0112219	0	17.1704	14.237	2
Ajuga macrosperma	-0.00513465	-0.0112219	0	17.072	14.182	2
Albizia amara	-0.00513465	-0.0112219	0	17.062	14.2164	2
Albizia lebbeck	-0.00513465	-0.0112219	0	17.1143	14.0968	2
Albizia lucidior	-0.00513465	-0.0112219	0	17.0606	14.271	2
Alcea rosea	-0.00860792	-0.0418826	0	16.7316	14.7771	2
Aleurites moluccanus	-0.00513465	-0.0112219	0	17.028	14.2167	2
Alkanna tinctoria	-0.00513465	-0.0112219	0	17.0023	14.2234	2
Allamanda schottii	-0.00513465	-0.0112219	0	17.0173	14.1298	2
Allium ampeloprasum	-0.00513465	-0.0112219	0	17.1142	14.0943	2
Allium schoenoprasum	-0.00513465	-0.0112219	0	17.0884	14.2504	2
Alnus nepalensis	-0.00513465	-0.0112219	0	17.1582	14.0982	2
Alnus nitida	-0.00513465	-0.0112219	0	17.0239	14.1169	2
Aloysia gratissima	-0.00513465	-0.0112219	0	17.059	14.0771	2
Alpinia galanga	-0.00513465	-0.0112219	0	17.0188	14.0343	2
Alpinia hainanensis	-0.00513465	-0.0112219	0	16.9244	14.2213	2
Alpinia nigra	-0.00513465	-0.0112219	0	17.0517	14.1527	2
Alstonia macrophylla	-0.00513465	-0.0112219	0	17.0551	14.1526	2
Alstonia scholaris	-0.00513465	-0.0112219	0	16.9412	13.9579	2
Alternanthera pungens	-0.00513465	-0.0112219	0	17.0206	14.1426	2
Alysicarpus rugosus	-0.00513465	-0.0112219	0	17.0492	14.1112	2
Amaranthus blitum	-0.00513465	-0.0112219	0	17.0013	14.0426	2
Amaranthus dubius	-0.00513465	-0.0112219	0	17.0079	13.9399	2
Amaranthus graecizans	-0.00513465	-0.0112219	0	17.1149	14.155	2
Amaranthus hybridus	-0.00513465	-0.0112219	0	16.9359	14.0394	2
Amaranthus hypochondriacus	-0.00513465	-0.0112219	0	16.9223	13.9684	2
Amaranthus tricolor	-0.00513465	-0.0112219	0	16.882	13.8972	2
Amaranthus viridis	-0.00513465	-0.0112219	0	16.8754	13.9796	2
Ambroma augusta	-0.00513465	-0.0112219	0	17.0066	14.0846	2
Ammannia baccifera	-0.00513465	-0.0112219	0	16.8953	13.97	2
Amomum testaceum	-0.00513465	-0.0112219	0	16.9936	14.0501	2
Amorpha fruticosa	-0.00513465	-0.0112219	0	17.0153	14.019	2
Anaphalis contorta	-0.00513465	-0.0112219	0	16.9595	13.9929	2
Anaphalis neelgerryana	-0.00513465	-0.0112219	0	16.9364	13.9632	2
Anastatica hierochuntica	-0.00513465	-0.0112219	0	16.9419	13.9652	2
Ancistrocladus heyneanus	-0.00513465	-0.0112219	0	16.8801	14.0606	2
Anemone rivularis	-0.00513465	-0.0112219	0	16.8997	13.9924	2
Anisomeles heyneana	-0.00513465	-0.0112219	0	16.8517	13.8931	2
Annona atemoya	-0.00513465	-0.0112219	0	16.8601	13.9018	2
Annona squamosa	-0.00513465	-0.0112219	0	16.8238	13.8839	2
Annona stenophylla	-0.00513465	-0.0112219	0	16.883	13.8612	2
Anoectochilus roxburghii	-0.00513465	-0.0112219	0	16.899	13.8074	2
Anthemis cotula	-0.00513465	-0.0112219	0	16.9249	13.9254	2
Anthriscus cerefolium	-0.00513465	-0.0112219	0	16.7526	14.0289	2
Anthriscus nemorosa	-0.00513465	-0.0112219	0	16.936	14.0002	2
Antiaris toxicaria	-0.00513465	-0.0112219	0	16.808	13.9831	2
Anticharis senegalensis	-0.00513465	-0.0112219	0	16.9079	13.9362	2
Antidesma acidum	-0.00513465	-0.0112219	0	16.8709	13.9882	2
Antidesma bunius	-0.00513465	-0.0112219	0	16.7084	13.8792	2
Antigonon leptopus	-0.00513465	-0.0112219	0	16.7754	13.9324	2
Apama siliquosa	-0.00513465	-0.0112219	0	16.7913	13.9276	2
Aphanamixis polystachya	-0.00513465	-0.0112219	0	16.8338	13.9601	2
Aquilaria sinensis	-0.00513465	-0.0112219	0	16.8276	14.0046	2
Ardisia japonica	-0.00513465	-0.0112219	0	16.7914	13.8279	2
Argania spinosa	-0.00513465	-0.0112219	0	16.8032	13.9017	2
Argemone ochroleuca	-0.00513465	-0.0112219	0	16.7604	13.8591	2
Argemone subfusiformis	-0.00513465	-0.0112219	0	16.6909	13.9333	2
Argyreia cuneata	-0.00513465	-0.0112219	0	16.8205	13.9606	2
Arnebia euchroma	-0.00513465	-0.0112219	0	16.6291	13.8942	2
Arnebia hispidissima	-0.00513465	-0.0112219	0	16.7879	13.9299	2
Arrhenatherum elatius	-0.00513465	-0.0112219	0	16.8	13.849	2
Artabotrys hexapetalus	-0.00513465	-0.0112219	0	16.6972	13.8563	2
Artemisia abrotanum	-0.00513465	-0.0112219	0	16.7481	13.8749	2
Artemisia biennis	-0.00513465	-0.0112219	0	16.7273	13.8704	2
Artemisia capillaris	-0.00513465	-0.0112219	0	16.6864	13.9221	2
Artemisia indica	-0.00513465	-0.0112219	0	16.7209	13.8537	2
Artemisia japonica	-0.00513465	-0.0112219	0	16.7131	14.0003	2
Artemisia macrocephala	-0.00513465	-0.0112219	0	16.7033	13.9694	2
Artemisia myriantha	-0.00513465	-0.0112219	0	16.6524	13.8838	2
Artemisia nilagirica	-0.00513465	-0.0112219	0	16.644	13.8304	2
Artemisia pallens	-0.00513465	-0.0112219	0	16.6334	13.8465	2
Artemisia persica	-0.00513465	-0.0112219	0	16.7315	13.8862	2
Artemisia roxburghiana	-0.00513465	-0.0112219	0	16.5228	13.9263	2
Artemisia scoparia	-0.00513465	-0.0112219	0	16.6377	13.8341	2
Artemisia sieversiana	-0.00513465	-0.0112219	0	16.6056	13.997	2
Artemisia siversiana	-0.00513465	-0.0112219	0	16.733	13.8363	2
Artemisia vestita	-0.00513465	-0.0112219	0	16.5724	13.8699	2
Asparagus adscendens	-0.00513465	-0.0112219	0	16.5688	13.8505	2
Asparagus gonoclados	-0.00513465	-0.0112219	0	16.4621	13.9441	2
Asparagus officinalis	-0.00513465	-0.0112219	0	16.5956	13.9081	2
Asparagus racemosus	-0.00513465	-0.0112219	0	16.5983	13.9582	2
Asphodelus fistulosus	-0.00513465	-0.0112219	0	16.6083	13.9087	2
Asphodelus tenuifolius	-0.00513465	-0.0112219	0	16.5958	13.8445	2
Asplenium septentrionale	-0.00513465	-0.0112219	0	16.6317	13.9443	2
Asplenium trichomanes	-0.00513465	-0.0112219	0	16.5142	13.9399	2
Asplenium yoshinagae	-0.00513465	-0.0112219	0	16.5442	13.9076	2
Aster ageratoides	-0.00513465	-0.0112219	0	16.5479	13.8431	2
Astilbe rivularis	-0.00513465	-0.0112219	0	16.5303	13.9038	2
Astragalus frigidus	-0.00513465	-0.0112219	0	16.473	13.9973	2
Astragalus hamosus	-0.00513465	-0.0112219	0	16.4565	13.9253	2
Astragalus himalayanus	-0.00513465	-0.0112219	0	16.442	13.9518	2
Asystasia gangetica	-0.00513465	-0.0112219	0	16.389	13.9728	2
Atractylodes macrocephala	-0.00513465	-0.0112219	0	16.5085	13.9612	2
Avena fatua	-0.00513465	-0.0112219	0	16.3541	13.9739	2
Averrhoa carambola	-0.00513465	-0.0112219	0	16.558	13.9122	2
Avicennia marina	-0.00513465	-0.0112219	0	16.3724	13.9561	2
Avicennia officinalis	-0.00513465	-0.0112219	0	16.4126	13.9904	2
Balanites aegyptiaca	-0.00513465	-0.0112219	0	16.4331	13.9267	2
Balanophora fungosa	-0.00513465	-0.0112219	0	16.4761	13.995	2
Bambusa bambos	-0.00513465	-0.0112219	0	16.3574	13.9862	2
Barleria cristata	-0.00513465	-0.0112219	0	16.4127	13.9681	2
Barleria prionitis	-0.00513465	-0.0112219	0	16.2595	14.0875	2
Barleria strigosa	-0.00513465	-0.0112219	0	16.3237	14.0719	2
Barringtonia racemosa	-0.00513465	-0.0112219	0	16.2332	14.0868	2
Bauhinia divaricata	-0.00513465	-0.0112219	0	16.3562	13.9866	2
Bauhinia malabarica	-0.00513465	-0.0112219	0	16.2429	14.1321	2
Bauhinia monandra	-0.00513465	-0.0112219	0	16.3072	14.0008	2
Bauhinia purpurea	-0.00513465	-0.0112219	0	16.3255	14.175	2
Bauhinia racemosa	-0.00513465	-0.0112219	0	16.2495	14.1383	2
Bauhinia roxburghiana	-0.00513465	-0.0112219	0	16.1732	14.0453	2
Bauhinia semla	-0.00513465	-0.0112219	0	16.2033	14.1686	2
Bauhinia tomentosa	-0.00513465	-0.0112219	0	16.2619	14.0826	2
Bauhinia vahlii	-0.00513465	-0.0112219	0	16.3316	14.2658	2
Beaumontia grandiflora	-0.00513465	-0.0112219	0	16.3575	13.9772	2
Begonia rex	-0.00513465	-0.0112219	0	15.9897	14.4914	2
Berberis insignis	-0.00513465	-0.0112219	0	16.2031	14.2762	2
Berberis nepalensis	-0.00513465	-0.0112219	0	16.144	14.3624	2
Berberis umbellata	-0.00513465	-0.0112219	0	16.3454	14.1175	2
Bergenia ciliata	-0.00513465	-0.0112219	0	16.2738	14.2537	2
Bergenia pacumbis	-0.00513465	-0.0112219	0	16.182	14.2471	2
Betula utilis	-0.00513465	-0.0112219	0	16.3179	14.0999	2
Bidens bipinnata	-0.00513465	-0.0112219	0	16.4221	14.48	2
Bidens cernua	-0.00513465	-0.0112219	0	16.0627	14.4349	2
Bidens pilosa	-0.00513465	-0.0112219	0	15.9794	14.333	2
Bidens tripartita	-0.00513465	-0.0112219	0	16.2653	14.1876	2
Bixa orellana	-0.00513465	-0.0112219	0	16.3013	14.1842	2
Blechnum occidentale	-0.00513465	-0.0112219	0	16.2625	14.585	2
Blepharis edulis	-0.00513465	-0.0112219	0	16.3653	14.2842	2
Blepharis scindica	-0.00513465	-0.0112219	0	16.2786	14.2321	2
Blighia sapida	-0.00513465	-0.0112219	0	16.2933	14.2915	2
Blumea balsamifera	-0.00513465	-0.0112219	0	16.1618	14.37	2
Blumea lacera	-0.00513465	-0.0112219	0	16.3756	14.2172	2
Blumea membranacea	-0.00513465	-0.0112219	0	16.0732	14.3454	2
Blumea obliqua	-0.00513465	-0.0112219	0	16.2653	14.2527	2
Boehmeria nivea	-0.00513465	-0.0112219	0	15.9061	14.886	2
Boerhavia diffusa	-0.00513465	-0.0112219	0	16.2088	14.2884	2
Borassus flabellifer	-0.00513465	-0.0112219	0	16.0561	14.2214	2
Boswellia serrata	-0.00513465	-0.0112219	0	16.0682	14.38	2
Bothriochloa bladhii	-0.00513465	-0.0112219	0	16.3575	14.2427	2
Bougainvillea spectabilis	-0.00513465	-0.0112219	0	16.1512	14.2959	2
Bridelia retusa	-0.00513465	-0.0112219	0	16.2307	14.375	2
Bruguiera gymnorhiza	-0.00513465	-0.0112219	0	16.0235	14.4157	2
Bruguiera sexangula	-0.00513465	-0.0112219	0	16.1902	14.2038	2
Brunfelsia americana	-0.00513465	-0.0112219	0	15.9861	14.9171	2
Bryophyllum peltatum	-0.00513465	-0.0112219	0	15.8022	15.0336	2
Bryophyllum pinnatum	-0.00513465	-0.0112219	0	16.0789	14.5326	2
Buchanania cochinchinensis	-0.00513465	-0.0112219	0	15.9476	15.153	2
Buddleja madagascariensis	-0.00513465	-0.0112219	0	15.951	14.641	2
Buglossoides arvensis	-0.00513465	-0.0112219	0	15.9072	14.7103	2
Bunium persicum	-0.00513465	-0.0112219	0	16.0281	14.8981	2
Bupleurum falcatum	-0.00513465	-0.0112219	0	15.9184	14.7058	2
Bupleurum longicaule	-0.00513465	-0.0112219	0	16.2014	14.2802	2
Bursera linanoe	-0.00513465	-0.0112219	0	15.9235	15.3455	2
Caccinia macranthera	-0.00513465	-0.0112219	0	15.8669	15.0833	2
Cadaba fruticosa	-0.00513465	-0.0112219	0	16.2943	15.2884	2
Caesalpinia bonduc	-0.00513465	-0.0112219	0	16.2773	14.8043	2
Caesalpinia coriaria	-0.00513465	-0.0112219	0	15.9823	15.4689	2
Caesalpinia digyna	-0.00513465	-0.0112219	0	16.7314	14.9511	2
Caesalpinia sappan	-0.00513465	-0.0112219	0	16.3223	14.7093	2
Cajanus scarabaeoides	-0.00513465	-0.0112219	0	15.9333	15.1491	2
Callicarpa macrophylla	-0.00513465	-0.0112219	0	16.212	15.0694	2
Callicarpa nudiflora	-0.00513465	-0.0112219	0	16.1657	15.3642	2
Callistemon lanceolatus	-0.00513465	-0.0112219	0	16.1938	15.2263	2
Callistemon polandii	-0.00513465	-0.0112219	0	16.0821	15.0017	2
Callistemon rigidus	-0.00513465	-0.0112219	0	16.3335	15.1701	2
Calophyllum apetalum	-0.00513465	-0.0112219	0	16.3775	15.4488	2
Calophyllum inophyllum	-0.00513465	-0.0112219	0	16.1781	15.414	2
Calophyllum soulattri	-0.00513465	-0.0112219	0	16.0625	15.0211	2
Calopogonium mucunoides	-0.00513465	-0.0112219	0	16.4314	15.3346	2
Calotropis procera	-0.00513465	-0.0112219	0	16.2035	14.9923	2
Calystegia hederacea	-0.00513465	-0.0112219	0	16.2392	15.2204	2
Canarium denticulatum	-0.00513465	-0.0112219	0	16.7787	15.6835	2
Canavalia ensiformis	-0.00513465	-0.0112219	0	16.7647	15.6662	2
Canscora diffusa	-0.00513465	-0.0112219	0	16.1031	15.0586	2
Capparis decidua	-0.00513465	-0.0112219	0	16.0335	14.849	2
Capparis grandis	-0.00513465	-0.0112219	0	16.1876	15.0993	2
Capparis moonii	-0.00513465	-0.0112219	0	16.257	15.2966	2
Capparis rotundifolia	-0.00513465	-0.0112219	0	16.119	15.4954	2
Capparis zeylanica	-0.00513465	-0.0112219	0	16.5137	15.6961	2
Cardamine impatiens	-0.00513465	-0.0112219	0	16.3925	15.5022	2
Cardiospermum halicacabum	-0.00513465	-0.0112219	0	16.6675	15.7059	2
Careya arborea	-0.00513465	-0.0112219	0	16.1446	15.3833	2
Carissa spinarum	-0.00513465	-0.0112219	0	16.5274	15.9794	2
Carlina acaulis	-0.00513465	-0.0112219	0	16.4166	15.9832	2
Carthamus lanatus	-0.00513465	-0.0112219	0	16.5344	15.7678	2
Carthamus oxyacantha	-0.00513465	-0.0112219	0	16.1708	15.372	2
Carum roxburghianum	-0.00513465	-0.0112219	0	16.6202	15.4943	2
Cascabela thevetia	-0.00513465	-0.0112219	0	16.5745	15.7807	2
Casearia esculenta	-0.00513465	-0.0112219	0	16.6688	15.6055	2
Casearia graveolens	-0.00513465	-0.0112219	0	16.3432	15.5543	2
Casearia tomentosa	-0.00513465	-0.0112219	0	16.5365	16.0012	2
Cassia renigera	-0.00513465	-0.0112219	0	16.4623	15.7006	2
Cassia roxburghii	-0.00513465	-0.0112219	0	16.3564	15.9385	2
Cassine glauca	-0.00513465	-0.0112219	0	16.5573	15.7973	2
Cassytha filiformis	-0.00513465	-0.0112219	0	16.2514	15.2092	2
Castanopsis lanceifolia	-0.00513465	-0.0112219	0	16.6624	15.9727	2
Castilla elastica	-0.00513465	-0.0112219	0	16.3894	15.2463	2
Catharanthus pusillus	-0.00513465	-0.0112219	0	16.7055	15.609	2
Catunaregam spinosa	-0.00513465	-0.0112219	0	16.8844	15.8999	2
Celastrus paniculatus	-0.00513465	-0.0112219	0	16.9533	15.6092	2
Celosia argentea	-0.00513465	-0.0112219	0	16.7648	15.5989	2
Cenchrus ciliaris	-0.00513465	-0.0112219	0	16.7843	15.9284	2
Centaurea benedicta	-0.00513465	-0.0112219	0	16.7838	15.6844	2
Centaurea bruguierana	-0.00513465	-0.0112219	0	16.7342	15.8133	2
Centaurea melitensis	-0.00513465	-0.0112219	0	16.7667	15.8096	2
Centipeda minima	-0.00513465	-0.0112219	0	16.8702	15.8201	2
Cephalotaxus mannii	-0.00513465	-0.0112219	0	16.6695	16.0043	2
Ceratophyllum demersum	-0.00513465	-0.0112219	0	16.7113	15.8355	2
Cerbera manghas	-0.00513465	-0.0112219	0	16.7773	16.2145	2
Ceriops decandra	-0.00513465	-0.0112219	0	16.817	15.8097	2
Ceriscoides turgida	-0.00513465	-0.0112219	0	16.9035	16.1279	2
Chaerophyllum aromaticum	-0.00513465	-0.0112219	0	17.0284	15.9057	2
Chamaecrista kleinii	-0.00513465	-0.0112219	0	16.9652	16.0077	2
Chamaecrista mimosoides	-0.00513465	-0.0112219	0	16.6832	15.7621	2
Chamaecrista pumila	-0.00513465	-0.0112219	0	17.3375	16.2932	2
Chamaecyparis lawsoniana	-0.00513465	-0.0112219	0	16.914	16.1949	2
Chamaecyparis obtusa	-0.00513465	-0.0112219	0	16.8416	16.1839	2
Cheilanthes farinosa	-0.00513465	-0.0112219	0	16.8303	16.1983	2
Chesneya cuneata	-0.00513465	-0.0112219	0	16.9712	15.9192	2
Chionanthus ramiflorus	-0.00513465	-0.0112219	0	16.7266	16.1058	2
Choerospondias axillaris	-0.00513465	-0.0112219	0	17.2831	16.0951	2
Chonemorpha fragrans	-0.00513465	-0.0112219	0	17.1238	15.9669	2
Christella dentata	-0.00513465	-0.0112219	0	17.1072	15.9899	2
Chrozophora plicata	-0.00513465	-0.0112219	0	17.1399	16.3359	2
Chrozophora rottleri	-0.00513465	-0.0112219	0	17.1217	16.2548	2
Chrysobalanus icaco	-0.00513465	-0.0112219	0	16.8746	15.9469	2
Chrysopogon fulvus	-0.00513465	-0.0112219	0	16.9935	16.1302	2
Cibotium barometz	-0.00513465	-0.0112219	0	16.9516	16.0437	2
Cicer microphyllum	-0.00513465	-0.0112219	0	17.1255	15.994	2
Cichorium endivia	-0.00513465	-0.0112219	0	16.9858	16.1809	2
Cinnamomum bejolghota	-0.00513465	-0.0112219	0	17.0907	16.3104	2
Cinnamomum glaucescens	-0.00513465	-0.0112219	0	17.0104	16.0857	2
Cinnamomum sulphuratum	-0.00513465	-0.0112219	0	17.3911	16.0886	2
Cirsium japonicum	-0.00513465	-0.0112219	0	17.2116	15.9664	2
Cistanche mongolica	-0.00513465	-0.0112219	0	17.5265	15.9776	2
Citrus latifolia	-0.00513465	-0.0112219	0	16.9893	15.9788	2
Citrus pennivesiculata	-0.00513465	-0.0112219	0	17.3391	16.2085	2
Clausena excavata	-0.00513465	-0.0112219	0	17.4709	16.2174	2
Clausena heptaphylla	-0.00513465	-0.0112219	0	17.0148	16.0506	2
Cleistanthus collinus	-0.00513465	-0.0112219	0	17.4112	15.8372	2
Cleome chelidonii	-0.00513465	-0.0112219	0	17.1239	16.1092	2
Cleome monophylla	-0.00513465	-0.0112219	0	17.1893	16.0749	2
Cleome simplicifolia	-0.00513465	-0.0112219	0	17.1418	16.0133	2
Cleome viscosa	-0.00513465	-0.0112219	0	17.4685	15.9144	2
Clerodendrum glandulosum	-0.00513465	-0.0112219	0	17.4727	16.1317	2
Clinopodium bolivianum	-0.00513465	-0.0112219	0	17.5796	16.3711	2
Clinopodium brownei	-0.00513465	-0.0112219	0	17.8524	16.1897	2
Clinopodium capitellatum	-0.00513465	-0.0112219	0	17.2866	15.9082	2
Clinopodium gilliesii	-0.00513465	-0.0112219	0	17.8864	16.1712	2
Clinopodium graveolens	-0.00513465	-0.0112219	0	17.4181	15.914	2
Clinopodium nepeta	-0.00513465	-0.0112219	0	17.5964	16.0624	2
Clinopodium nubigenum	-0.00513465	-0.0112219	0	17.6737	16.1714	2
Clinopodium odorum	-0.00513465	-0.0112219	0	17.4647	16.2903	2
Clinopodium vulgare	-0.00513465	-0.0112219	0	17.4641	15.9167	2
Clitoria mariana	-0.00513465	-0.0112219	0	17.5536	16.0236	2
Cobaea scandens	-0.00513465	-0.0112219	0	17.4185	16.0321	2
Coccoloba uvifera	-0.00513465	-0.0112219	0	17.6287	16.0756	2
Cochlospermum religiosum	-0.00513465	-0.0112219	0	17.7724	15.8441	2
Cocos nucifera	-0.00513465	-0.0112219	0	17.7992	16.1911	2
Codiaeum variegatum	-0.00513465	-0.0112219	0	17.7244	16.0473	2
Codonopsis clematidea	-0.00513465	-0.0112219	0	17.7473	16.0595	2
Codonopsis ovata	-0.00513465	-0.0112219	0	17.8631	15.9254	2
Colebrookea oppositifolia	-0.00513465	-0.0112219	0	17.9267	15.8729	2
Coleus forskohlii	-0.00513465	-0.0112219	0	18.0192	15.7733	2
Colubrina asiatica	-0.00513465	-0.0112219	0	17.7969	16.0831	2
Commelina communis	-0.00513465	-0.0112219	0	18.1724	16.116	2
Commiphora ornifolia	-0.00513465	-0.0112219	0	17.7555	15.9579	2
Commiphora parvifolia	-0.00513465	-0.0112219	0	17.8705	15.9355	2
Commiphora wightii	-0.00513465	-0.0112219	0	17.6778	15.7139	2
Consolida orientalis	-0.00513465	-0.0112219	0	18.3873	15.7664	2
Convallaria majalis	-0.00513465	-0.0112219	0	17.7871	15.7765	2
Convolvulus microphyllus	-0.00513465	-0.0112219	0	17.992	15.9249	2
Convolvulus prostratus	-0.00513465	-0.0112219	0	18.4993	15.4794	2
Corallocarpus epigaeus	-0.00513465	-0.0112219	0	17.7375	15.7814	2
Corchorus aestuans	-0.00513465	-0.0112219	0	17.8492	15.7901	2
Corchorus depressus	-0.00513465	-0.0112219	0	17.5468	15.8663	2
Corchorus fascicularis	-0.00513465	-0.0112219	0	18.4342	15.6342	2
Corchorus olitorius	-0.00513465	-0.0112219	0	17.7733	15.816	2
Corchorus tridens	-0.00513465	-0.0112219	0	17.8872	15.8918	2
Cordia cylindrostachya	-0.00513465	-0.0112219	0	18.2758	15.8054	2
Cordia dichotoma	-0.00513465	-0.0112219	0	18.0588	15.8483	2
Cordia myxa	-0.00513465	-0.0112219	0	17.4781	15.6761	2
Cordia sebestena	-0.00513465	-0.0112219	0	18.1633	15.9409	2
Cordia sinensis	-0.00513465	-0.0112219	0	17.6627	16.0203	2
Cordyline australis	-0.00513465	-0.0112219	0	17.5533	15.5827	2
Cordyline fruticosa	-0.00513465	-0.0112219	0	17.6461	15.6982	2
Coreopsis tinctoria	-0.00513465	-0.0112219	0	18.3357	15.887	2
Coriaria nepalensis	-0.00513465	-0.0112219	0	18.1462	15.7551	2
Cornus capitata	-0.00513465	-0.0112219	0	17.9275	15.7052	2
Cornus sanguinea	-0.00513465	-0.0112219	0	17.6943	15.6986	2
Corydalis meifolia	-0.00513465	-0.0112219	0	18.0569	15.6742	2
Corymbia calophylla	-0.00513465	-0.0112219	0	17.6853	15.7822	2
Corymbia torelliana	-0.00513465	-0.0112219	0	17.9118	15.8465	2
Cosmos sulphureus	-0.00513465	-0.0112219	0	18.1304	15.6496	2
Cotoneaster adpressus	-0.00513465	-0.0112219	0	18.2068	15.6293	2
Cotoneaster integrifolius	-0.00513465	-0.0112219	0	18.1828	15.7109	2
Couroupita guianensis	-0.00513465	-0.0112219	0	18.251	15.6123	2
Crambe hispanica	-0.00513465	-0.0112219	0	18.1751	15.5894	2
Crataegus songarica	-0.00513465	-0.0112219	0	17.8486	15.4796	2
Crateva adansonii	-0.00513465	-0.0112219	0	18.0597	15.4929	2
Crateva nurvala	-0.00513465	-0.0112219	0	18.0379	15.3916	2
Crateva religiosa	-0.00513465	-0.0112219	0	18.1815	15.4309	2
Cratoxylum formosum	-0.00513465	-0.0112219	0	18.0955	15.4006	2
Crepidium acuminatum	-0.00513465	-0.0112219	0	18.5134	15.4179	2
Crescentia cujete	-0.00513465	-0.0112219	0	17.9114	15.4648	2
Crinum amabile	-0.00513465	-0.0112219	0	17.9058	15.2672	2
Crinum latifolium	-0.00513465	-0.0112219	0	18.0916	15.7587	2
Crithmum maritimum	-0.00513465	-0.0112219	0	18.0655	15.466	2
Crossandra infundibuliformis	-0.00513465	-0.0112219	0	18.3547	15.4808	2
Crotalaria angulata	-0.00513465	-0.0112219	0	18.0682	15.5095	2
Crotalaria burhia	-0.00513465	-0.0112219	0	17.9866	15.4847	2
Crotalaria hebecarpa	-0.00513465	-0.0112219	0	17.9498	15.3363	2
Crotalaria laburnifolia	-0.00513465	-0.0112219	0	18.2668	15.3673	2
Crotalaria linifolia	-0.00513465	-0.0112219	0	18.2554	15.3131	2
Crotalaria medicaginea	-0.00513465	-0.0112219	0	18.4876	15.3803	2
Crotalaria pallida	-0.00513465	-0.0112219	0	18.4038	15.412	2
Crotalaria paniculata	-0.00513465	-0.0112219	0	17.9278	15.3014	2
Crotalaria retusa	-0.00513465	-0.0112219	0	17.8642	15.307	2
Crotalaria triquetra	-0.00513465	-0.0112219	0	18.2544	15.3581	2
Crotalaria verrucosa	-0.00513465	-0.0112219	0	18.5211	15.0445	2
Crotalaria wightiana	-0.00513465	-0.0112219	0	18.1206	15.3073	2
Croton bonplandianus	-0.00513465	-0.0112219	0	17.8604	15.438	2
Croton joufra	-0.00513465	-0.0112219	0	18.1474	15.4905	2
Croton persimilis	-0.00513465	-0.0112219	0	18.0938	15.1866	2
Croton sublyratus	-0.00513465	-0.0112219	0	18.3621	15.1895	2
Croton tiglium	-0.00513465	-0.0112219	0	18.0794	15.3679	2
Cryptolepis dubia	-0.00513465	-0.0112219	0	18.3523	15.2244	2
Cryptostegia grandiflora	-0.00513465	-0.0112219	0	18.1223	15.0098	2
Cucumis sativus	-0.00513465	-0.0112219	0	18.3225	15.1204	2
Cunninghamia lanceolata	-0.00513465	-0.0112219	0	17.6876	15.5377	2
Cupressus cashmeriana	-0.00513465	-0.0112219	0	17.8836	15.4173	2
Cupressus funebris	-0.00513465	-0.0112219	0	18.087	15.4009	2
Cupressus lusitanica	-0.00513465	-0.0112219	0	18.2387	15.1341	2
Cupressus macrocarpa	-0.00513465	-0.0112219	0	17.9838	15.1213	2
Cupressus torulosa	-0.00513465	-0.0112219	0	18.111	15.2771	2
Curculigo orchioides	-0.00513465	-0.0112219	0	18.0371	15.1274	2
Curcuma mangga	-0.00513465	-0.0112219	0	18.1211	15.4436	2
Cuscuta chinensis	-0.00513465	-0.0112219	0	17.9522	15.2155	2
Cuscuta epithymum	-0.00513465	-0.0112219	0	18.3944	14.783	2
Cyanthillium cinereum	-0.00513465	-0.0112219	0	18.3874	14.9649	2
Cycas revoluta	-0.00513465	-0.0112219	0	18.2899	15.06	2
Cymbopogon caesius	-0.00513465	-0.0112219	0	17.5692	15.0033	2
Cymbopogon coloratus	-0.00513465	-0.0112219	0	18.2394	15.0261	2
Cymbopogon commutatus	-0.00513465	-0.0112219	0	18.0555	14.6657	2
Cymbopogon distans	-0.00513465	-0.0112219	0	17.9604	15.0332	2
Cymbopogon jwarancusa	-0.00513465	-0.0112219	0	18.1894	15.0984	2
Cymbopogon khasianus	-0.00513465	-0.0112219	0	18.1439	15.017	2
Cymbopogon microstachys	-0.00513465	-0.0112219	0	17.9407	14.6207	2
Cymbopogon pendulus	-0.00513465	-0.0112219	0	18.053	14.8429	2
Cymbopogon winterianus	-0.00513465	-0.0112219	0	18.286	14.6631	2
Cynanchum acutum	-0.00513465	-0.0112219	0	17.8544	15.1517	2
Cyperus articulatus	-0.00513465	-0.0112219	0	18.1513	14.8485	2
Cyperus difformis	-0.00513465	-0.0112219	0	18.0833	14.8869	2
Cyperus esculentus	-0.00513465	-0.0112219	0	17.7641	14.4828	2
Cyperus rotundus	-0.00513465	-0.0112219	0	17.9255	14.8503	2
Daemonorops draco	-0.00513465	-0.0112219	0	18.0242	15.1017	2
Dalbergia lanceolaria	-0.00513465	-0.0112219	0	17.5188	15.0946	2
Dalbergia stipulacea	-0.00513465	-0.0112219	0	18.1794	14.8766	2
Dalbergia volubilis	-0.00513465	-0.0112219	0	17.9693	14.6961	2
Daphne mucronata	-0.00513465	-0.0112219	0	17.965	14.9323	2
Daphne oleoides	-0.00513465	-0.0112219	0	18.0276	14.8469	2
Decalepis arayalpathra	-0.00513465	-0.0112219	0	17.8327	15.0513	2
Decalepis hamiltonii	-0.00513465	-0.0112219	0	18.0743	14.9445	2
Delphinium cashmerianum	-0.00513465	-0.0112219	0	17.6647	15.0794	2
Delphinium denudatum	-0.00513465	-0.0112219	0	17.5608	14.9657	2
Dendrobium macraei	-0.00513465	-0.0112219	0	18.0057	14.7257	2
Dendrobium secundum	-0.00513465	-0.0112219	0	17.3914	14.8676	2
Dendrophthoe pentandra	-0.00513465	-0.0112219	0	17.8836	14.9679	2
Derris trifoliata	-0.00513465	-0.0112219	0	17.7441	14.7687	2
Desmodium multiflorum	-0.00513465	-0.0112219	0	17.8991	14.8115	2
Desmos chinensis	-0.00513465	-0.0112219	0	17.644	15.0756	2
Dichrocephala integrifolia	-0.00513465	-0.0112219	0	17.4604	14.7618	2
Dichrostachys cinerea	-0.00513465	-0.0112219	0	17.8411	14.9346	2
Dicliptera chinensis	-0.00513465	-0.0112219	0	17.6622	14.9072	2
Dicranostigma lactucoides	-0.00513465	-0.0112219	0	17.6416	15.0621	2
Didymocarpus pedicellatus	-0.00513465	-0.0112219	0	17.9805	14.6561	2
Digera muricata	-0.00513465	-0.0112219	0	17.5978	14.8392	2
Digitalis purpurea	-0.00513465	-0.0112219	0	18.1357	14.8184	2
Dillenia indica	-0.00513465	-0.0112219	0	17.4402	14.5414	2
Dillenia pentagyna	-0.00513465	-0.0112219	0	17.7528	14.7993	2
Dioscorea bulbifera	-0.00513465	-0.0112219	0	17.6677	14.9103	2
Dioscorea deltoidea	-0.00513465	-0.0112219	0	17.4835	14.7505	2
Dioscorea floribunda	-0.00513465	-0.0112219	0	17.4515	14.9563	2
Dioscorea pentaphylla	-0.00513465	-0.0112219	0	17.786	14.7412	2
Diospyros discolor	-0.00513465	-0.0112219	0	17.44	15.026	2
Diospyros malabarica	-0.00513465	-0.0112219	0	17.3914	14.6751	2
Diospyros melanoxylon	-0.00513465	-0.0112219	0	17.7168	14.7653	2
Diospyros montana	-0.00513465	-0.0112219	0	17.6705	14.7485	2
Diplazium esculentum	-0.00513465	-0.0112219	0	17.496	14.5848	2
Diplocyclos palmatus	-0.00513465	-0.0112219	0	17.6215	14.9123	2
Dipsacus fullonum	-0.00513465	-0.0112219	0	17.5343	14.6696	2
Dipteracanthus prostratus	-0.00513465	-0.0112219	0	17.535	14.7179	2
Dipterocarpus retusus	-0.00513465	-0.0112219	0	17.8448	14.6506	2
Dipterocarpus turbinatus	-0.00513465	-0.0112219	0	17.5657	14.7594	2
Discladium squarrosum	-0.00513465	-0.0112219	0	17.3843	14.9001	2
Dittrichia graveolens	-0.00513465	-0.0112219	0	17.4138	14.818	2
Dolichandra unguis-cati	-0.00513465	-0.0112219	0	17.4617	14.6932	2
Dombeya burgessiae	-0.00513465	-0.0112219	0	17.4559	14.903	2
Dorema ammoniacum	-0.00513465	-0.0112219	0	17.2288	14.7539	2
Dovyalis caffra	-0.00513465	-0.0112219	0	17.5011	14.7351	2
Dracocephalum heterophyllum	-0.00513465	-0.0112219	0	17.4053	14.9223	2
Dracocephalum moldavica	-0.00513465	-0.0112219	0	17.5934	14.7018	2
Dregea volubilis	-0.00513465	-0.0112219	0	17.0698	14.8349	2
Drimia indica	-0.00513465	-0.0112219	0	17.4495	14.7178	2
Drosera peltata	-0.00513465	-0.0112219	0	17.0759	14.8988	2
Drymaria cordata	-0.00513465	-0.0112219	0	17.4407	14.8528	2
Drynaria quercifolia	-0.00513465	-0.0112219	0	17.3542	14.9658	2
Dysosma aurantiocaulis	-0.00513465	-0.0112219	0	17.3287	14.7719	2
Dysoxylum gotadhora	-0.00513465	-0.0112219	0	17.4046	14.9217	2
Ecbolium ligustrinum	-0.00513465	-0.0112219	0	17.5413	15.0779	2
Ecbolium viride	-0.00513465	-0.0112219	0	17.3061	14.8802	2
Echinacea angustifolia	-0.00513465	-0.0112219	0	17.3202	15.1877	2
Echinochloa colona	-0.00513465	-0.0112219	0	17.6411	15.0521	2
Echinops echinatus	-0.00513465	-0.0112219	0	17.3289	15.1066	2
Echinops niveus	-0.00513465	-0.0112219	0	17.2353	14.9883	2
Ehretia microphylla	-0.00513465	-0.0112219	0	17.1598	15.0849	2
Elaeis guineensis	-0.00513465	-0.0112219	0	17.4036	15.0783	2
Elaeocarpus serratus	-0.00513465	-0.0112219	0	17.2654	14.8996	2
Eleocharis dulcis	-0.00513465	-0.0112219	0	17.438	14.9528	2
Elephantopus scaber	-0.00513465	-0.0112219	0	17.2478	14.9653	2
Eleusine coracana	-0.00513465	-0.0112219	0	17.3824	14.9987	2
Eleusine indica	-0.00513465	-0.0112219	0	17.4345	15.1257	2
Eleutherococcus trifoliatus	-0.00513465	-0.0112219	0	17.3887	14.9302	2
Elsholtzia blanda	-0.00513465	-0.0112219	0	17.3225	14.8964	2
Elsholtzia densa	-0.00513465	-0.0112219	0	16.7544	15.1769	2
Elsholtzia eriostachya	-0.00513465	-0.0112219	0	17.328	14.9805	2
Elsholtzia fruticosa	-0.00513465	-0.0112219	0	17.2683	15.0878	2
Elsholtzia strobilifera	-0.00513465	-0.0112219	0	16.6788	15.3345	2
Elymus repens	-0.00513465	-0.0112219	0	17.3032	15.0612	2
Elytraria acaulis	-0.00513465	-0.0112219	0	17.1458	15.0234	2
Ensete superbum	-0.00513465	-0.0112219	0	16.972	14.811	2
Entada gigas	-0.00513465	-0.0112219	0	17.1749	15.0608	2
Enydra fluctuans	-0.00513465	-0.0112219	0	17.1396	15.029	2
Ephedra major	-0.00513465	-0.0112219	0	17.1515	14.7625	2
Epilobium hirsutum	-0.00513465	-0.0112219	0	16.2392	15.0705	2
Epilobium parviflorum	-0.00513465	-0.0112219	0	16.723	14.8205	2
Equisetum hyemale	-0.00724207	-0.0159303	0	16.7444	14.7857	2
Erigeron aegyptiacus	-0.00513465	-0.0112219	0	17.0097	15.0228	2
Eryngium caeruleum	-0.00513465	-0.0112219	0	16.9332	15.0098	2
Erysimum cheiri	-0.00513465	-0.0112219	0	16.8129	14.8548	2
Erythrina arborescens	-0.00513465	-0.0112219	0	16.8168	14.7908	2
Erythrina fusca	-0.00513465	-0.0112219	0	16.7929	14.8659	2
Erythrina suberosa	-0.00513465	-0.0112219	0	16.672	15.0303	2
Erythrina subumbrans	-0.00513465	-0.0112219	0	16.8498	14.9639	2
Erythroxylum coca	-0.00513465	-0.0112219	0	16.7423	14.8737	2
Erythroxylum monogynum	-0.00513465	-0.0112219	0	16.905	14.8924	2
Ethulia conyzoides	-0.00513465	-0.0112219	0	16.9474	14.8312	2
Etlingera linguiformis	-0.00513465	-0.0112219	0	16.2471	15.3984	2
Eucalyptus alba	-0.00513465	-0.0112219	0	16.8128	14.9004	2
Eucalyptus albens	-0.00513465	-0.0112219	0	16.9917	14.8993	2
Eucalyptus astringens	-0.00513465	-0.0112219	0	16.8682	15.0858	2
Eucalyptus baueriana	-0.00513465	-0.0112219	0	16.4458	14.9302	2
Eucalyptus cinerea	-0.00513465	-0.0112219	0	16.8886	15.1325	2
Eucalyptus crebra	-0.00513465	-0.0112219	0	16.8359	15.0059	2
Eucalyptus dealbata	-0.00513465	-0.0112219	0	16.8291	15.058	2
Eucalyptus deglupta	-0.00513465	-0.0112219	0	16.8548	15.0091	2
Eucalyptus delegatensis	-0.00513465	-0.0112219	0	16.42	15.1921	2
Eucalyptus exserta	-0.00513465	-0.0112219	0	16.8122	15.0099	2
Eucalyptus foecunda	-0.00513465	-0.0112219	0	16.2474	15.2271	2
Eucalyptus hybrida	-0.00513465	-0.0112219	0	16.803	15.1522	2
Eucalyptus jensenii	-0.00513465	-0.0112219	0	16.837	15.1265	2
Eucalyptus kirtoniana	-0.00513465	-0.0112219	0	16.4077	15.1698	2
Eucalyptus leucoxylon	-0.00513465	-0.0112219	0	16.519	15.2987	2
Eucalyptus macarthurii	-0.00513465	-0.0112219	0	16.707	15.0565	2
Eucalyptus macrocarpa	-0.00513465	-0.0112219	0	16.8391	15.2645	2
Eucalyptus macrorhyncha	-0.00513465	-0.0112219	0	16.3954	15.2787	2
Eucalyptus melanophloia	-0.00513465	-0.0112219	0	16.6296	15.2433	2
Eucalyptus microtheca	-0.00513465	-0.0112219	0	16.7939	15.0375	2
Eucalyptus moluccana	-0.00513465	-0.0112219	0	16.1795	15.5628	2
Eucalyptus obliqua	-0.00513465	-0.0112219	0	16.7936	15.0756	2
Eucalyptus pulverulenta	-0.00513465	-0.0112219	0	16.4306	15.5347	2
Eucalyptus robusta	-0.00513465	-0.0112219	0	16.2391	15.3742	2
Eucalyptus saligna	-0.00513465	-0.0112219	0	16.7869	15.1026	2
Eucalyptus smithii	-0.00513465	-0.0112219	0	16.5418	15.0206	2
Eucalyptus staigeriana	-0.00513465	-0.0112219	0	16.7521	15.1735	2
Eucalyptus urophylla	-0.00513465	-0.0112219	0	16.4902	15.7333	2
Eucalyptus viridis	-0.00513465	-0.0112219	0	16.4265	15.1816	2
Eucalyptus youmanii	-0.00513465	-0.0112219	0	16.6373	15.1733	2
Euchresta horsfieldii	-0.00513465	-0.0112219	0	16.5007	15.3026	2
Eugenia uniflora	-0.00513465	-0.0112219	0	16.2172	15.645	2
Eupatorium cannabinum	-0.00513465	-0.0112219	0	16.1627	15.5494	2
Eupatorium chinense	-0.00513465	-0.0112219	0	16.5448	15.0972	2
Euphorbia dracunculoides	-0.00513465	-0.0112219	0	16.146	15.1352	2
Euphorbia granulata	-0.00513465	-0.0112219	0	16.1017	15.5909	2
Euphorbia helioscopia	-0.00513465	-0.0112219	0	16.5814	15.6656	2
Euphorbia heterophylla	-0.00513465	-0.0112219	0	16.3743	15.4287	2
Euphorbia heyneana	-0.00513465	-0.0112219	0	16.0986	15.6569	2
Euphorbia hypericifolia	-0.00513465	-0.0112219	0	16.4175	15.3578	2
Euphorbia indica	-0.00513465	-0.0112219	0	16.4998	15.2645	2
Euphorbia lathyris	-0.00513465	-0.0112219	0	16.278	15.6542	2
Euphorbia maddenii	-0.00513465	-0.0112219	0	16.2851	15.5097	2
Euphorbia peplus	-0.00513465	-0.0112219	0	16.3687	15.825	2
Euphorbia prostrata	-0.00513465	-0.0112219	0	16.5717	15.1297	2
Euphorbia resinifera	-0.00513465	-0.0112219	0	16.3199	15.9063	2
Euphorbia royleana	-0.00513465	-0.0112219	0	16.5469	15.4417	2
Euphorbia serpens	-0.00513465	-0.0112219	0	16.3762	15.2996	2
Euphorbia tirucalli	-0.00513465	-0.0112219	0	16.1323	15.8136	2
Euphrasia officinalis	-0.00513465	-0.0112219	0	16.5086	15.7226	2
Euphrasia simplex	-0.00513465	-0.0112219	0	16.2168	15.69	2
Eurya japonica	-0.00513465	-0.0112219	0	16.1469	15.7046	2
Euryale ferox	-0.00513465	-0.0112219	0	16.1737	15.6439	2
Evolvulus alsinoides	-0.00513465	-0.0112219	0	16.4132	15.4604	2
Excoecaria agallocha	-0.00513465	-0.0112219	0	16.4857	15.5857	2
Fagonia arabica	-0.00627959	-0.0140274	0	17.87	15.0594	2
Fagonia cretica	-0.00627959	-0.0140274	0	17.8375	15.1199	2
Fagonia indica	-0.00513465	-0.0112219	0	16.2163	15.7085	2
Fagonia paulayana	-0.00513465	-0.0112219	0	16.125	15.5499	2
Fagopyrum tataricum	-0.00513465	-0.0112219	0	16.1006	15.6758	2
Fagus sylvatica	-0.00513465	-0.0112219	0	16.1035	15.6103	2
Faidherbia albida	-0.00513465	-0.0112219	0	16.5488	15.9394	2
Falcaria vulgaris	-0.00513465	-0.0112219	0	16.2221	15.4921	2
Ferula arrigonii	-0.00513465	-0.0112219	0	16.0691	15.7475	2
Ferula foetida	-0.00513465	-0.0112219	0	16.1054	15.6346	2
Ferula galbaniflua	-0.00513465	-0.0112219	0	16.222	15.8637	2
Ferula jaeschkeana	-0.00513465	-0.0112219	0	16.1834	15.8618	2
Ferula moschata	-0.00513465	-0.0112219	0	16.064	15.7797	2
Ferula narthex	-0.00513465	-0.0112219	0	16.3036	15.8422	2
Ferula oopoda	-0.00513465	-0.0112219	0	16.2349	15.9466	2
Ferula ovina	-0.00513465	-0.0112219	0	16.2189	15.7193	2
Ferula persica	-0.00513465	-0.0112219	0	16.3761	16.0338	2
Ficus benghalensis	-0.00513465	-0.0112219	0	16.1535	15.7811	2
Ficus elastica	-0.00513465	-0.0112219	0	16.4881	15.8505	2
Ficus exasperata	-0.00513465	-0.0112219	0	16.3895	15.8237	2
Ficus hispida	-0.00513465	-0.0112219	0	16.2897	16.131	2
Ficus palmata	-0.00513465	-0.0112219	0	16.3621	15.9234	2
Ficus racemosa	-0.00513465	-0.0112219	0	16.3787	15.8842	2
Ficus religiosa	-0.00513465	-0.0112219	0	16.4037	16.0461	2
Ficus virens	-0.00513465	-0.0112219	0	16.129	15.9646	2
Filicium decipiens	-0.00513465	-0.0112219	0	16.1976	15.8501	2
Fimbristylis quinquangularis	-0.00513465	-0.0112219	0	16.4106	16.1094	2
Firmiana simplex	-0.00513465	-0.0112219	0	16.2488	16.0526	2
Flacourtia indica	-0.00513465	-0.0112219	0	16.2223	15.9771	2
Flagellaria indica	-0.00513465	-0.0112219	0	16.5839	16.3829	2
Fleurya interrupta	-0.00513465	-0.0112219	0	16.3299	16.0085	2
Flueggea leucopyrus	-0.00513465	-0.0112219	0	16.5498	16.2913	2
Flueggea virosa	-0.00513465	-0.0112219	0	16.3679	16.0714	2
Forsythia viridissima	-0.00513465	-0.0112219	0	16.3877	16.1068	2
Fragaria ananassa	-0.00513465	-0.0112219	0	16.3099	16.0618	2
Fraxinus excelsior	-0.00513465	-0.0112219	0	16.2133	15.8976	2
Fraxinus hookeri	-0.00513465	-0.0112219	0	16.5096	16.2305	2
Fumaria officinalis	-0.00513465	-0.0112219	0	16.2422	16.1479	2
Fumaria vaillantii	-0.00513465	-0.0112219	0	16.2368	16.0186	2
Funtumia elastica	-0.00513465	-0.0112219	0	16.4005	16.2212	2
Gaillardia aristata	-0.00513465	-0.0112219	0	16.5159	16.2143	2
Galega officinalis	-0.00513465	-0.0112219	0	16.4533	16.2703	2
Galinsoga quadriradiata	-0.00513465	-0.0112219	0	16.4917	16.129	2
Galium verum	-0.00513465	-0.0112219	0	16.4548	16.3347	2
Galphimia glauca	-0.00513465	-0.0112219	0	16.9098	16.5051	2
Garcinia huillensis	-0.00513465	-0.0112219	0	16.5777	16.3369	2
Garcinia xanthochymus	-0.00513465	-0.0112219	0	16.4359	16.3339	2
Garuga pinnata	-0.00513465	-0.0112219	0	16.3374	16.2296	2
Gaultheria fragrantissima	-0.00513465	-0.0112219	0	16.5604	16.3161	2
Gentiana argentea	-0.00513465	-0.0112219	0	16.5101	16.2486	2
Gentiana depressa	-0.00513465	-0.0112219	0	16.465	16.299	2
Gentiana elwesii	-0.00513465	-0.0112219	0	16.8642	16.4962	2
Gentiana prolata	-0.00513465	-0.0112219	0	16.5231	16.1792	2
Gentiana sikkimensis	-0.00513465	-0.0112219	0	16.7263	16.2418	2
Gentianopsis paludosa	-0.00513465	-0.0112219	0	16.6346	16.3543	2
Geranium collinum	-0.00513465	-0.0112219	0	16.8466	16.5048	2
Geranium nepalense	-0.00513465	-0.0112219	0	16.6912	16.2915	2
Geranium pratense	-0.00513465	-0.0112219	0	16.8379	16.6484	2
Geranium robertianum	-0.00513465	-0.0112219	0	17.2462	16.466	2
Geranium sibiricum	-0.00513465	-0.0112219	0	17.3942	16.3462	2
Geranium wallichianum	-0.00513465	-0.0112219	0	16.7206	16.403	2
Gerbera lanuginosa	-0.00513465	-0.0112219	0	16.9446	16.1225	2
Gerbera piloselloides	-0.00513465	-0.0112219	0	17.7819	16.3309	2
Getonia floribunda	-0.00513465	-0.0112219	0	17.3756	15.9417	2
Geum macrophyllum	-0.00513465	-0.0112219	0	16.9283	16.3084	2
Gisekia pharnaceoides	-0.00513465	-0.0112219	0	16.6776	16.4571	2
Glaphyropteridopsis erubescens	-0.00513465	-0.0112219	0	17.4645	16.2304	2
Gleditsia sinensis	-0.00513465	-0.0112219	0	16.9506	16.2839	2
Glinus oppositifolius	-0.00513465	-0.0112219	0	17.9264	16.3568	2
Globba marantina	-0.00513465	-0.0112219	0	16.895	16.3653	2
Globba sessiliflora	-0.00513465	-0.0112219	0	17.1651	16.1493	2
Glochidion heyneanum	-0.00513465	-0.0112219	0	17.0758	16.414	2
Gmelina philippensis	-0.00513465	-0.0112219	0	17.3195	16.1812	2
Gnetum gnemon	-0.00513465	-0.0112219	0	16.9109	16.3355	2
Gnetum montanum	-0.00513465	-0.0112219	0	16.8331	16.4683	2
Goniothalamus wightii	-0.00513465	-0.0112219	0	17.947	16.3399	2
Gossypium arboreum	-0.00724207	-0.0159303	0	16.663	14.7408	2
Gossypium barbadense	-0.00513465	-0.0112219	0	17.1267	16.3421	2
Gossypium herbaceum	-0.00724207	-0.0159303	0	16.668	14.7902	2
Gossypium hirsutum	-0.00513465	-0.0112219	0	17.0983	16.5841	2
Guizotia abyssinica	-0.00513465	-0.0112219	0	17.3375	16.5375	2
Gymnema sylvestre	-0.00513465	-0.0112219	0	17.4395	16.6542	2
Gynocardia odorata	-0.00513465	-0.0112219	0	17.864	16.4769	2
Gynostemma pentaphyllum	-0.00513465	-0.0112219	0	17.4657	16.4437	2
Halophila ovalis	-0.00513465	-0.0112219	0	16.9585	16.4423	2
Haplanthodes verticillatus	-0.00513465	-0.0112219	0	18.1379	16.3145	2
Hedera colchica	-0.00513465	-0.0112219	0	17.7681	16.3194	2
Hedychium coccineum	-0.00513465	-0.0112219	0	18.0674	16.1003	2
Hedychium longicornutum	-0.00513465	-0.0112219	0	17.264	16.1505	2
Helichrysum buddleioides	-0.00513465	-0.0112219	0	18.4868	15.5862	2
Helichrysum odoratissimum	-0.00513465	-0.0112219	0	18.0609	15.9778	2
Heliotropium ovalifolium	-0.00513465	-0.0112219	0	18.518	15.9446	2
Hemidictyum ceterach	-0.00513465	-0.0112219	0	17.5526	16.5054	2
Hemigraphis hirta	-0.00513465	-0.0112219	0	18.1316	16.117	2
Heracleum candolleanum	-0.00513465	-0.0112219	0	17.2051	16.3876	2
Heritiera littoralis	-0.00513465	-0.0112219	0	18.5676	15.5134	2
Heterophragma quadriloculare	-0.00513465	-0.0112219	0	17.4121	16.3138	2
Heteropogon contortus	-0.00513465	-0.0112219	0	17.22	16.4149	2
Heterostemma tanjorense	-0.00513465	-0.0112219	0	18.228	16.1878	2
Heynea trijuga	-0.00513465	-0.0112219	0	17.2276	16.4964	2
Hibiscus hispidissimus	-0.00513465	-0.0112219	0	18.6897	15.1977	2
Hibiscus micranthus	-0.00513465	-0.0112219	0	17.4916	16.258	2
Hibiscus surattensis	-0.00513465	-0.0112219	0	18.6399	15.4422	2
Hibiscus syriacus	-0.00513465	-0.0112219	0	18.7272	15.2075	2
Hibiscus vitifolius	-0.00513465	-0.0112219	0	17.5017	16.0898	2
Hieracium umbellatum	-0.00513465	-0.0112219	0	18.3649	15.9779	2
Hippophae tibetana	-0.00513465	-0.0112219	0	18.7266	15.2322	2
Hiptage benghalensis	-0.00513465	-0.0112219	0	17.535	16.237	2
Holarrhena mitis	-0.00513465	-0.0112219	0	18.6596	14.9981	2
Holarrhena pubescens	-0.00513465	-0.0112219	0	18.3773	15.7406	2
Holigarna ferruginea	-0.00513465	-0.0112219	0	18.5717	14.7676	2
Holoptelea integrifolia	-0.00513465	-0.0112219	0	17.6472	16.2891	2
Homalomena aromatica	-0.00513465	-0.0112219	0	18.5836	15.2969	2
Homonoia riparia	-0.00513465	-0.0112219	0	18.8305	15.1852	2
Hopea odorata	-0.00513465	-0.0112219	0	18.4283	15.4775	2
Hoppea dichotoma	-0.00513465	-0.0112219	0	17.64	15.977	2
Humulus lupulus	-0.00513465	-0.0112219	0	18.581	14.5933	2
Hunnemannia fumariifolia	-0.00513465	-0.0112219	0	18.6322	15.4592	2
Hura crepitans	-0.00513465	-0.0112219	0	18.6088	15.1007	2
Hydnocarpus alpina	-0.00513465	-0.0112219	0	18.5899	14.6604	2
Hydnocarpus anthelminthica	-0.00513465	-0.0112219	0	18.4426	15.6329	2
Hydnocarpus kurzii	-0.00513465	-0.0112219	0	18.6941	14.8643	2
Hydnocarpus pentandrus	-0.00513465	-0.0112219	0	18.5352	14.3678	2
Hydnocarpus wightianus	-0.00513465	-0.0112219	0	18.3265	14.4361	2
Hydrangea paniculata	-0.00513465	-0.0112219	0	18.3434	14.4633	2
Hydrocotyle rotundifolia	-0.00513465	-0.0112219	0	18.5363	15.082	2
Hydrocotyle sibthorpioides	-0.00513465	-0.0112219	0	18.7404	14.6865	2
Hygrophila auriculata	-0.00513465	-0.0112219	0	18.7607	14.5798	2
Hygrophila polysperma	-0.00513465	-0.0112219	0	18.3928	14.1961	2
Hypericum calycinum	-0.00513465	-0.0112219	0	18.6851	14.9941	2
Hypericum hookerianum	-0.00513465	-0.0112219	0	18.547	14.3744	2
Hypericum humifusum	-0.00513465	-0.0112219	0	18.4058	14.3331	2
Hypericum japonicum	-0.00513465	-0.0112219	0	18.5216	14.7386	2
Hypericum monogynum	-0.00513465	-0.0112219	0	18.4895	14.1937	2
Hypericum olympicum	-0.00513465	-0.0112219	0	18.5106	14.2681	2
Hypericum patulum	-0.00513465	-0.0112219	0	18.4054	14.1054	2
Hyphaene dichotoma	-0.00513465	-0.0112219	0	18.4555	13.8512	2
Hypochoeris radicata	-0.00513465	-0.0112219	0	18.3157	14.4505	2
Hyptis pectinata	-0.00513465	-0.0112219	0	18.2115	14.544	2
Hyptis suaveolens	-0.00513465	-0.0112219	0	18.2634	14.1263	2
Illicium griffithii	-0.00513465	-0.0112219	0	18.1512	14.7104	2
Impatiens bicolor	-0.00513465	-0.0112219	0	18.2227	15.2087	2
Indigofera arrecta	-0.00513465	-0.0112219	0	17.9778	13.5532	2
Indigofera aspalathoides	-0.00513465	-0.0112219	0	18.1288	13.6784	2
Indigofera heterantha	-0.00513465	-0.0112219	0	17.2877	12.9864	2
Indigofera hirsuta	-0.00513465	-0.0112219	0	18.2886	13.92	2
Indigofera hochstetteri	-0.00513465	-0.0112219	0	17.4575	14.0535	2
Indigofera linifolia	-0.00513465	-0.0112219	0	18.5354	13.8598	2
Indigofera linnaei	-0.00513465	-0.0112219	0	18.3779	13.9816	2
Indigofera mysorensis	-0.00513465	-0.0112219	0	18.2186	13.7807	2
Indigofera tinctoria	-0.00513465	-0.0112219	0	17.5943	14.3703	2
Indigofera wightii	-0.00513465	-0.0112219	0	17.4919	14.1544	2
Indoneesiella echioides	-0.00513465	-0.0112219	0	17.9865	13.3761	2
Inula cappa	-0.00513465	-0.0112219	0	17.3942	14.2799	2
Inula cuspidata	-0.00513465	-0.0112219	0	17.849	13.5917	2
Inula royleana	-0.00513465	-0.0112219	0	17.7367	13.6039	2
Ipomoea cheirophylla	-0.00513465	-0.0112219	0	17.1345	13.1796	2
Ipomoea coptica	-0.00513465	-0.0112219	0	17.6958	14.1595	2
Ipomoea dichroa	-0.00513465	-0.0112219	0	17.6833	13.2989	2
Ipomoea fistulosa	-0.00513465	-0.0112219	0	17.9526	13.2666	2
Ipomoea hederifolia	-0.00513465	-0.0112219	0	17.3954	13.4408	2
Ipomoea mauritiana	-0.00513465	-0.0112219	0	17.293	13.8271	2
Ipomoea muricata	-0.00513465	-0.0112219	0	17.1991	14.0621	2
Ipomoea nil	-0.00513465	-0.0112219	0	17.3523	13.323	2
Ipomoea pes-tigridis	-0.00513465	-0.0112219	0	17.2082	13.2223	2
Ipomoea quamoclit	-0.00513465	-0.0112219	0	17.354	13.6562	2
Ipomoea rubriflora	-0.00513465	-0.0112219	0	17.3541	14.1239	2
Ipomoea turbinata	-0.00513465	-0.0112219	0	16.4913	13.4007	2
Iris ensata	-0.00513465	-0.0112219	0	17.8697	13.6056	2
Iris hookeriana	-0.00513465	-0.0112219	0	16.9533	13.2294	2
Iris kemaonensis	-0.00513465	-0.0112219	0	16.8688	13.361	2
Iris pseudacorus	-0.00513465	-0.0112219	0	17.0333	13.4299	2
Isodon melissoides	-0.00513465	-0.0112219	0	17.3533	13.949	2
Isodon rugosus	-0.00513465	-0.0112219	0	16.5198	14.5852	2
Isodon ternifolius	-0.00513465	-0.0112219	0	16.4435	13.132	2
Isodon wightii	-0.00513465	-0.0112219	0	16.8366	13.2473	2
Ixora chinensis	-0.00513465	-0.0112219	0	16.9534	14.2142	2
Ixora javanica	-0.00513465	-0.0112219	0	17.4322	14.6197	2
Ixora nigricans	-0.00513465	-0.0112219	0	17.1557	13.8998	2
Ixora pavetta	-0.00513465	-0.0112219	0	17.3216	15.5721	2
Jacquemontia paniculata	-0.00513465	-0.0112219	0	17.4011	14.3549	2
Jasminum flexile	-0.00513465	-0.0112219	0	17.5505	15.3197	2
Jasminum mesnyi	-0.00513465	-0.0112219	0	16.876	13.1554	2
Jasminum ritchiei	-0.00513465	-0.0112219	0	17.3429	14.3318	2
Jatropha curcas	-0.00513465	-0.0112219	0	17.0823	13.9698	2
Jatropha glandulifera	-0.00513465	-0.0112219	0	16.7349	14.3946	2
Jatropha gossypiifolia	-0.00513465	-0.0112219	0	17.3791	13.3765	2
Jatropha heynei	-0.00513465	-0.0112219	0	16.7176	14.3639	2
Juncus bufonius	-0.00513465	-0.0112219	0	16.5243	14.1798	2
Juniperus bermudiana	-0.00513465	-0.0112219	0	16.2069	13.4325	2
Juniperus chinensis	-0.00513465	-0.0112219	0	16.4475	13.4072	2
Juniperus excelsa	-0.00513465	-0.0112219	0	16.9391	15.1832	2
Juniperus indica	-0.00513465	-0.0112219	0	17.2514	14.5485	2
Juniperus phoenicea	-0.00513465	-0.0112219	0	17.3661	15.315	2
Juniperus recurva	-0.00513465	-0.0112219	0	16.6587	13.4754	2
Juniperus rigida	-0.00513465	-0.0112219	0	16.6878	13.2437	2
Juniperus semiglobosa	-0.00513465	-0.0112219	0	16.7094	13.5629	2
Juniperus squamata	-0.00513465	-0.0112219	0	17.6115	14.7989	2
Justicia gendarussa	-0.00513465	-0.0112219	0	16.7994	14.2757	2
Justicia prostrata	-0.00513465	-0.0112219	0	16.3147	13.2948	2
Kaempferia rotunda	-0.00513465	-0.0112219	0	16.1313	13.3687	2
Kalanchoe integra	-0.00513465	-0.0112219	0	16.1201	13.374	2
Khaya senegalensis	-0.00513465	-0.0112219	0	17.1266	13.7437	2
Kigelia africana	-0.00513465	-0.0112219	0	16.4887	14.2594	2
Kleinhovia hospita	-0.00513465	-0.0112219	0	16.605	13.9048	2
Knema attenuata	-0.00513465	-0.0112219	0	16.8013	14.1353	2
Knema cinerea	-0.00513465	-0.0112219	0	16.5552	14.471	2
Kopsia fruticosa	-0.00513465	-0.0112219	0	16.9572	13.8458	2
Krameria lappacea	-0.00513465	-0.0112219	0	16.3792	13.3632	2
Kyllinga brevifolia	-0.00513465	-0.0112219	0	16.4713	13.5274	2
Lactuca serriola	-0.00513465	-0.0112219	0	16.192	13.9108	2
Lagerstroemia parviflora	-0.00513465	-0.0112219	0	16.5897	14.3551	2
Lagerstroemia thorelii	-0.00513465	-0.0112219	0	15.9656	13.7113	2
Laggera alata	-0.00513465	-0.0112219	0	16.7247	13.5618	2
Laggera aurita	-0.00513465	-0.0112219	0	17.3273	14.3094	2
Lantana montevidensis	-0.00513465	-0.0112219	0	16.6284	14.7536	2
Laphangium affine	-0.00513465	-0.0112219	0	16.7334	13.6579	2
Lathyrus odoratus	-0.00513465	-0.0112219	0	16.7425	14.8925	2
Lathyrus sativus	-0.00513465	-0.0112219	0	16.9553	15.2556	2
Launaea aspleniifolia	-0.00513465	-0.0112219	0	17.0692	15.2843	2
Lavandula bipinnata	-0.00513465	-0.0112219	0	16.693	15.0477	2
Lavandula pedunculata	-0.00513465	-0.0112219	0	17.0979	14.681	2
Leonotis nepetifolia	-0.00513465	-0.0112219	0	16.9181	14.967	2
Leonurus cardiaca	-0.00513465	-0.0112219	0	16.9731	14.8245	2
Leonurus sibiricus	-0.00513465	-0.0112219	0	17.3136	14.8989	2
Lepidagathis cuspidata	-0.00513465	-0.0112219	0	16.8632	14.8915	2
Lepidium didymum	-0.00513465	-0.0112219	0	17.2402	15.2422	2
Lepidium draba	-0.00513465	-0.0112219	0	17.2674	15.3461	2
Lepidium virginicum	-0.00513465	-0.0112219	0	17.0877	15.2658	2
Lepisanthes rubiginosa	-0.00513465	-0.0112219	0	17.1115	15.4056	2
Leptadenia pyrotechnica	-0.00513465	-0.0112219	0	16.3817	14.3095	2
Leptadenia reticulata	-0.00513465	-0.0112219	0	16.8235	14.8443	2
Leptospermum scoparium	-0.00513465	-0.0112219	0	17.2128	14.7805	2
Leucanthemum vulgare	-0.00513465	-0.0112219	0	17.1342	15.3348	2
Leucas cephalotes	-0.00513465	-0.0112219	0	17.1497	15.2776	2
Leucas lanata	-0.00513465	-0.0112219	0	16.8667	14.6367	2
Leucas lavandulifolia	-0.00513465	-0.0112219	0	17.2463	14.9921	2
Leucas stelligera	-0.00513465	-0.0112219	0	17.0795	14.9939	2
Licuala spinosa	-0.00513465	-0.0112219	0	17.1603	15.2117	2
Ligusticum porteri	-0.00513465	-0.0112219	0	17.2807	14.6069	2
Ligustrum nepalense	-0.00513465	-0.0112219	0	17.1615	15.2369	2
Ligustrum perrottetii	-0.00513465	-0.0112219	0	16.7558	14.4728	2
Ligustrum robustum	-0.00513465	-0.0112219	0	17.2922	15.3047	2
Limnophila repens	-0.00513465	-0.0112219	0	17.1152	15.1502	2
Lindelofia stylosa	-0.00513465	-0.0112219	0	17.155	15.3158	2
Lindenbergia indica	-0.00513465	-0.0112219	0	17.1655	15.2681	2
Lindenbergia muraria	-0.00513465	-0.0112219	0	16.9462	14.8705	2
Liriodendron tulipifera	-0.00513465	-0.0112219	0	17.1322	15.0193	2
Litsea cubeba	-0.00513465	-0.0112219	0	17.4383	14.6633	2
Litsea glutinosa	-0.00513465	-0.0112219	0	17.3836	15.2518	2
Litsea stocksii	-0.00513465	-0.0112219	0	17.0856	15.122	2
Lobularia maritima	-0.00513465	-0.0112219	0	17.0238	15.1008	2
Lonicera hypoleuca	-0.00513465	-0.0112219	0	17.0575	15.1697	2
Ludwigia hyssopifolia	-0.00513465	-0.0112219	0	17.1758	15.1946	2
Ludwigia octovalvis	-0.00513465	-0.0112219	0	17.1271	15.1181	2
Ludwigia perennis	-0.00513465	-0.0112219	0	17.1408	15.1075	2
Luma chequen	-0.00513465	-0.0112219	0	16.9043	14.7815	2
Lycium chinense	-0.00513465	-0.0112219	0	17.1673	15.119	2
Lyonia ovalifolia	-0.00513465	-0.0112219	0	17.1165	15.1202	2
Macaranga peltata	-0.00513465	-0.0112219	0	17.1036	15.1835	2
Macroptilium atropurpureum	-0.00513465	-0.0112219	0	17.1828	15.1596	2
Maerua oblongifolia	-0.00513465	-0.0112219	0	17.0311	15.1273	2
Maesa indica	-0.00513465	-0.0112219	0	17.2247	15.0629	2
Maesa macrophylla	-0.00513465	-0.0112219	0	17.2531	14.9968	2
Magnolia salicifolia	-0.00513465	-0.0112219	0	17.1243	15.1201	2
Magnolia sieboldii	-0.00513465	-0.0112219	0	17.1924	15.0517	2
Magnolia stellata	-0.00513465	-0.0112219	0	17.1976	14.8663	2
Majidea zanguebarica	-0.00513465	-0.0112219	0	17.1514	14.9417	2
Mallotus philippensis	-0.00513465	-0.0112219	0	17.072	15.1491	2
Mallotus roxburghianus	-0.00513465	-0.0112219	0	17.1198	15.0645	2
Malva parviflora	-0.00513465	-0.0112219	0	17.1151	14.878	2
Malva sylvestris	-0.00513465	-0.0112219	0	17.2387	14.9415	2
Malvastrum coromandelianum	-0.00513465	-0.0112219	0	17.0462	15.1052	2
Malvaviscus arboreus	-0.00513465	-0.0112219	0	17.0449	15.0875	2
Mammea americana	-0.00513465	-0.0112219	0	17.0947	14.8152	2
Mammea longifolia	-0.00513465	-0.0112219	0	17.0319	14.8998	2
Manilkara hexandra	-0.00513465	-0.0112219	0	17.3361	14.8374	2
Manilkara kauki	-0.00513465	-0.0112219	0	16.9795	14.5863	2
Manilkara littoralis	-0.00513465	-0.0112219	0	17.1275	14.7805	2
Mansoa alliacea	-0.00513465	-0.0112219	0	16.9669	14.7937	2
Maranta arundinacea	-0.00513465	-0.0112219	0	17.2751	14.8318	2
Marsilea minuta	-0.00513465	-0.0112219	0	16.7722	14.5762	2
Maytenus rothiana	-0.00513465	-0.0112219	0	17.1473	14.9319	2
Medicago falcata	-0.00513465	-0.0112219	0	17.1454	14.883	2
Medicago monantha	-0.00513465	-0.0112219	0	17.1993	14.9188	2
Medicago orthoceras	-0.00513465	-0.0112219	0	16.9513	14.7131	2
Melaleuca leucadendra	-0.00513465	-0.0112219	0	17.0077	15.0147	2
Melastoma malabathricum	-0.00513465	-0.0112219	0	17.1715	14.6721	2
Melia azedarach	-0.00513465	-0.0112219	0	17.1939	14.636	2
Melilotus albus	-0.00513465	-0.0112219	0	17.1565	14.7241	2
Memecylon malabaricum	-0.00513465	-0.0112219	0	17.0311	14.9588	2
Memecylon umbellatum	-0.00513465	-0.0112219	0	17.0621	14.721	2
Mentha diemenica	-0.00513465	-0.0112219	0	17.2634	14.9219	2
Mentha grandiflora	-0.00513465	-0.0112219	0	17.005	14.77	2
Mentha rotundifolia	-0.00513465	-0.0112219	0	17.0938	14.9069	2
Meriandra dianthera	-0.00513465	-0.0112219	0	17.0323	14.9684	2
Merremia aegyptia	-0.00513465	-0.0112219	0	17.2075	14.8056	2
Merremia tridentata	-0.00513465	-0.0112219	0	17.1641	14.5072	2
Meyna laxiflora	-0.00513465	-0.0112219	0	17.1321	14.7701	2
Meyna spinosa	-0.00513465	-0.0112219	0	17.1646	14.6389	2
Micromelum integerrimum	-0.00513465	-0.0112219	0	17.0327	14.7252	2
Micromeria biflora	-0.00513465	-0.0112219	0	17.1864	14.9041	2
Mikania scandens	-0.00513465	-0.0112219	0	17.2992	14.7549	2
Millettia peguensis	-0.00513465	-0.0112219	0	17.2524	14.8295	2
Mimosa pudica	-0.00513465	-0.0112219	0	17.0697	14.892	2
Mimosa rubicaulis	-0.00513465	-0.0112219	0	17.3407	14.6941	2
Minthostachys mollis	-0.00513465	-0.0112219	0	17.069	14.8621	2
Minthostachys verticillata	-0.00513465	-0.0112219	0	17.0406	14.8502	2
Mitragyna parvifolia	-0.00513465	-0.0112219	0	16.9919	14.8141	2
Modiola caroliniana	-0.00513465	-0.0112219	0	16.9868	14.8086	2
Mollugo cerviana	-0.00513465	-0.0112219	0	17.1447	14.8047	2
Momordica cymbalaria	-0.00513465	-0.0112219	0	16.9337	14.7226	2
Monotropa uniflora	-0.00513465	-0.0112219	0	16.8164	14.6505	2
Morina longifolia	-0.00513465	-0.0112219	0	17.033	14.7047	2
Morinda angustifolia	-0.00513465	-0.0112219	0	16.9009	14.5942	2
Morinda coreia	-0.00513465	-0.0112219	0	16.9448	14.6586	2
Moringa concanensis	-0.00513465	-0.0112219	0	16.9333	14.5794	2
Moringa pterygosperma	-0.00513465	-0.0112219	0	16.7337	14.5217	2
Morus australis	-0.00513465	-0.0112219	0	17.2054	14.7146	2
Morus indica	-0.00513465	-0.0112219	0	16.9024	14.7605	2
Morus nigra	-0.00513465	-0.0112219	0	17.0337	14.5301	2
Moullava spicata	-0.00513465	-0.0112219	0	16.8971	14.6717	2
Mussaenda frondosa	-0.00513465	-0.0112219	0	16.8469	14.5802	2
Mussaenda glabrata	-0.00513465	-0.0112219	0	16.7244	14.5381	2
Mussaenda hirsutissima	-0.00513465	-0.0112219	0	16.9395	14.6981	2
Mussaenda philippica	-0.00513465	-0.0112219	0	16.9301	14.7373	2
Myristica dactyloides	-0.00513465	-0.0112219	0	16.7506	14.6126	2
Naravelia zeylanica	-0.00513465	-0.0112219	0	16.8781	14.4586	2
Nardostachys jatamansi	-0.0168043	-0.0308139	0	18.0247	14.8253	2
Naregamia alata	-0.00513465	-0.0112219	0	16.6557	14.7768	2
Nasturtium officinale	-0.0358791	-0.0619505	0	16.7287	14.9164	2
Nelumbo nucifera	-0.0266835	-0.0401213	0	16.7086	14.8893	2
Neolamarckia cadamba	-0.00513465	-0.0112219	0	16.5243	14.7904	2
Neolitsea fischeri	-0.00513465	-0.0112219	0	16.6938	14.9084	2
Neolitsea pallens	-0.00513465	-0.0112219	0	16.6482	14.8464	2
Neolitsea zeylanica	-0.00513465	-0.0112219	0	16.7028	14.9027	2
Neonauclea purpurea	-0.00811033	-0.0176031	0	16.6133	14.8805	2
Neopicrorhiza scrophulariiflora	-0.00883636	-0.018247	0	16.6645	14.7924	2
Nepeta cataria	-0.0244957	-0.00385076	0	16.6861	14.8965	2
Nepeta eriostachya	-0.00513465	-0.0112219	0	16.477	14.5544	2
Nepeta govaniana	-0.00513465	-0.0112219	0	16.5589	14.8914	2
Nepeta hindostana	-0.0345374	-0.11373	0	16.4954	14.8157	2
Nepeta nuda	-0.00513465	-0.0112219	0	16.2917	14.7259	2
Nepeta persica	-0.00513465	-0.0112219	0	17.4627	15.4865	2
Neptunia oleracea	-0.00513465	-0.0112219	0	18.2755	15.0463	2
Nerium oleander	-0.00724207	-0.0159303	0	16.4078	14.9236	2
Neuracanthus sphaerostachys	-0.00513465	-0.0112219	0	17.6611	15.3161	2
Nyctanthes arbor-tristis	-0.00513465	-0.0112219	0	15.6204	13.8733	2
Nymphaea alba	-0.00513465	-0.0112219	0	16.0341	13.7315	2
Nymphaea nouchali	-0.00513465	-0.0112219	0	15.77	13.8128	2
Nymphoides cristata	-0.00513465	-0.0112219	0	15.6307	13.919	2
Nymphoides hydrophylla	-0.00513465	-0.0112219	0	16.4739	14.604	2
Nymphoides indica	-0.00513465	-0.0112219	0	16.9992	13.8854	2
Nymphoides peltata	-0.00513465	-0.0112219	0	15.8198	13.7757	2
Ochna gamblei	-0.00513465	-0.0112219	0	15.3584	14.6488	2
Ochna jabotapita	-0.00513465	-0.0112219	0	15.8259	13.8134	2
Ochna obtusata	-0.00513465	-0.0112219	0	15.7901	14.003	2
Ochrocarpos longifolius	-0.00513465	-0.0112219	0	15.6174	14.3138	2
Ochrosia elliptica	-0.00513465	-0.0112219	0	15.3954	15.1369	2
Ocimum africanum	-0.00513465	-0.0112219	0	15.6407	13.8981	2
Ocimum campechianum	-0.00513465	-0.0112219	0	15.8097	13.7065	2
Ocimum filamentosum	-0.00513465	-0.0112219	0	15.5227	14.2574	2
Ocimum gratissimum	-0.00513465	-0.0112219	0	15.6971	13.77	2
Ocimum kilimandscharicum	-0.00513465	-0.0112219	0	15.7152	13.8272	2
Odontites vulgaris	-0.00513465	-0.0112219	0	15.4084	14.3423	2
Oenothera biennis	-0.00513465	-0.0112219	0	15.466	15.2732	2
Oenothera lamarckiana	-0.00513465	-0.0112219	0	16.1526	13.7239	2
Oldenlandia auricularia	-0.00513465	-0.0112219	0	15.7731	14.488	2
Oldenlandia biflora	-0.00513465	-0.0112219	0	15.4125	14.3488	2
Oldenlandia umbellata	-0.00513465	-0.0112219	0	15.512	14.4045	2
Olea dioica	-0.00513465	-0.0112219	0	15.4758	14.102	2
Onosma echioides	-0.00513465	-0.0112219	0	15.4113	14.3878	2
Opopanax chironium	-0.00513465	-0.0112219	0	15.7713	13.8419	2
Origanum onites	-0.00513465	-0.0112219	0	15.7743	14.0705	2
Ormocarpum sennoides	-0.00513465	-0.0112219	0	15.6847	13.9307	2
Orthosiphon thymiflorus	-0.00513465	-0.0112219	0	15.5205	14.011	2
Osbeckia chinensis	-0.00513465	-0.0112219	0	15.4864	14.5114	2
Osmunda regalis	-0.00513465	-0.0112219	0	15.5956	14.1334	2
Oxalis corniculata	-0.00513465	-0.0112219	0	15.5994	14.0142	2
Oxytropis kansuensis	-0.00513465	-0.0112219	0	15.499	14.4188	2
Pachira aquatica	-0.00513465	-0.0112219	0	15.6355	14.2712	2
Pachysandra terminalis	-0.00513465	-0.0112219	0	15.3307	15.0056	2
Paeonia officinalis	-0.00513465	-0.0112219	0	15.448	14.9307	2
Paliurus spina-christi	-0.00513465	-0.0112219	0	15.5105	14.2416	2
Panax pseudoginseng	-0.00513465	-0.0112219	0	15.5433	14.2295	2
Pandanus tectorius	-0.00513465	-0.0112219	0	15.4764	14.9978	2
Papaver hybridum	-0.00513465	-0.0112219	0	15.4411	14.5059	2
Paracalyx scariosus	-0.00513465	-0.0112219	0	15.533	14.2144	2
Parkia biglandulosa	-0.00513465	-0.0112219	0	15.6764	14.111	2
Parkinsonia aculeata	-0.00513465	-0.0112219	0	15.4463	14.4628	2
Passiflora quadrangularis	-0.00513465	-0.0112219	0	15.6541	14.0637	2
Pavonia odorata	-0.00513465	-0.0112219	0	15.6142	14.3323	2
Pedalium murex	-0.00513465	-0.0112219	0	15.4659	14.8986	2
Pelargonium exstipulatum	-0.00513465	-0.0112219	0	17.608	15.0988	2
Pelargonium fragrans	-0.00513465	-0.0112219	0	15.5983	14.7275	2
Pelargonium odoratissimum	-0.00513465	-0.0112219	0	15.5207	14.7584	2
Pelargonium reniforme	-0.00513465	-0.0112219	0	15.4162	14.8863	2
Pentatropis capensis	-0.00513465	-0.0112219	0	15.7133	14.2005	2
Pergularia daemia	-0.00513465	-0.0112219	0	15.5195	14.5427	2
Periploca aphylla	-0.00513465	-0.0112219	0	15.7854	14.1523	2
Perovskia abrotanoides	-0.00513465	-0.0112219	0	15.5643	14.3382	2
Persicaria alpina	-0.00513465	-0.0112219	0	15.7234	14.8702	2
Persicaria amplexicaulis	-0.00513465	-0.0112219	0	15.4873	14.2363	2
Persicaria chinensis	-0.00513465	-0.0112219	0	15.8533	14.376	2
Persicaria glabra	-0.00513465	-0.0112219	0	15.7374	14.2104	2
Persicaria maculosa	-0.00513465	-0.0112219	0	15.4686	14.5796	2
Persicaria minor	-0.00513465	-0.0112219	0	15.3973	14.6856	2
Persicaria nepalensis	-0.00513465	-0.0112219	0	16.1154	14.417	2
Persicaria pulchra	-0.00513465	-0.0112219	0	15.3981	14.9474	2
Persicaria wallichii	-0.00513465	-0.0112219	0	15.4593	14.5953	2
Peucedanum officinale	-0.00513465	-0.0112219	0	16.2103	14.5571	2
Phlomoides umbrosa	-0.00513465	-0.0112219	0	17.68	14.679	2
Phoenix sylvestris	-0.00513465	-0.0112219	0	15.3522	14.9345	2
Phragmites australis	-0.00513465	-0.0112219	0	16.4976	14.32	2
Phyla nodiflora	-0.00513465	-0.0112219	0	15.66	14.33	2
Phyllanthus acidus	-0.00513465	-0.0112219	0	15.8672	14.183	2
Phyllanthus fraternus	-0.00513465	-0.0112219	0	15.6453	15.2172	2
Phyllanthus urinaria	-0.00513465	-0.0112219	0	15.588	14.9128	2
Physalis alkekengi	-0.00513465	-0.0112219	0	15.6395	14.8123	2
Physalis indica	-0.00513465	-0.0112219	0	15.4751	14.792	2
Physalis minima	-0.00513465	-0.0112219	0	15.5023	15.0787	2
Physostigma venenosum	-0.00513465	-0.0112219	0	15.4488	14.7373	2
Picea engelmannii	-0.00513465	-0.0112219	0	15.6726	14.4036	2
Picrasma javanica	-0.00513465	-0.0112219	0	15.6302	14.7618	2
Picrasma quassioides	-0.00513465	-0.0112219	0	15.6291	14.6395	2
Picris hieracioides	-0.00513465	-0.0112219	0	15.8453	14.5082	2
Pieris formosa	-0.00513465	-0.0112219	0	15.5413	14.7128	2
Pimenta dioica	-0.00513465	-0.0112219	0	15.4782	14.6483	2
Pimenta racemosa	-0.00513465	-0.0112219	0	15.9392	14.3501	2
Pinus canariensis	-0.00513465	-0.0112219	0	16.1757	14.6746	2
Pinus gerardiana	-0.00513465	-0.0112219	0	15.5199	14.7627	2
Pinus kesiya	-0.00513465	-0.0112219	0	15.4282	14.8207	2
Pinus merkusii	-0.00513465	-0.0112219	0	15.5599	14.6258	2
Pinus taeda	-0.00513465	-0.0112219	0	15.5551	14.9022	2
Piper aduncum	-0.00513465	-0.0112219	0	15.6528	14.4633	2
Pisonia grandis	-0.00513465	-0.0112219	0	15.6252	15.0233	2
Pistacia khinjuk	-0.00513465	-0.0112219	0	15.9802	14.5603	2
Pistacia terebinthus	-0.00513465	-0.0112219	0	15.9771	14.4451	2
Pittosporum napaulense	-0.00513465	-0.0112219	0	15.6488	14.8346	2
Plantago afra	-0.00513465	-0.0112219	0	15.6288	14.5766	2
Plantago ovata	-0.00513465	-0.0112219	0	15.7559	14.6565	2
Platanus orientalis	-0.00513465	-0.0112219	0	16.4628	14.8398	2
Platycodon grandiflorus	-0.00513465	-0.0112219	0	15.6017	14.5983	2
Plectranthus barbatus	-0.00513465	-0.0112219	0	15.7268	14.6664	2
Plectranthus glandulosus	-0.00513465	-0.0112219	0	15.7388	14.4432	2
Plectranthus mollis	-0.00513465	-0.0112219	0	15.7651	14.4392	2
Plectranthus rotundifolius	-0.00513465	-0.0112219	0	15.8783	14.5766	2
Pluchea indica	-0.00513465	-0.0112219	0	15.708	14.8645	2
Pluchea lanceolata	-0.00513465	-0.0112219	0	15.9211	14.6171	2
Plumbago auriculata	-0.00513465	-0.0112219	0	15.7361	14.4604	2
Plumbago indica	-0.00513465	-0.0112219	0	15.889	14.5224	2
Plumbago zeylanica	-0.00513465	-0.0112219	0	15.8978	14.3769	2
Plumeria alba	-0.00513465	-0.0112219	0	15.9724	14.4764	2
Podocarpus neriifolius	-0.00513465	-0.0112219	0	15.6817	14.6323	2
Pogostemon benghalensis	-0.00513465	-0.0112219	0	15.7881	14.476	2
Pogostemon cablin	-0.00513465	-0.0112219	0	15.7994	14.6518	2
Pogostemon heyneanus	-0.00513465	-0.0112219	0	15.9116	14.5625	2
Pogostemon stellatus	-0.00513465	-0.0112219	0	15.8032	14.62	2
Polyalthia longifolia	-0.00513465	-0.0112219	0	15.7835	14.7056	2
Polygonum affine	-0.00513465	-0.0112219	0	15.7048	14.7514	2
Polygonum aviculare	-0.00513465	-0.0112219	0	15.7039	14.5381	2
Polygonum perfoliatum	-0.00513465	-0.0112219	0	15.9236	14.5993	2
Polygonum plebeium	-0.00513465	-0.0112219	0	16.0332	14.6734	2
Polypodium vulgare	-0.00513465	-0.0112219	0	15.8842	14.5236	2
Pongamia pinnata	-0.00513465	-0.0112219	0	15.9784	14.7257	2
Portulaca pilosa	-0.00513465	-0.0112219	0	15.7219	14.8171	2
Portulaca quadrifida	-0.00513465	-0.0112219	0	15.8762	14.5255	2
Potentilla argentea	-0.00513465	-0.0112219	0	15.8981	14.6843	2
Potentilla reptans	-0.00513465	-0.0112219	0	15.8185	14.5889	2
Pourouma guianensis	-0.00513465	-0.0112219	0	15.8192	14.6323	2
Praecitrullus fistulosus	-0.00513465	-0.0112219	0	15.7597	14.6514	2
Premna corymbosa	-0.00513465	-0.0112219	0	15.8568	14.7186	2
Premna herbacea	-0.00513465	-0.0112219	0	15.8257	14.8641	2
Primula denticulata	-0.00513465	-0.0112219	0	15.7959	14.6213	2
Prinsepia utilis	-0.00513465	-0.0112219	0	15.8543	14.7992	2
Prosopis chilensis	-0.00513465	-0.0112219	0	15.8417	14.8243	2
Prosopis cineraria	-0.00513465	-0.0112219	0	15.858	14.8164	2
Prosopis farcta	-0.00513465	-0.0112219	0	15.968	14.6943	2
Pseudotsuga menziesii	-0.00513465	-0.0112219	0	15.9079	14.6443	2
Psilotum nudum	-0.00513465	-0.0112219	0	15.9783	14.6443	2
Psophocarpus tetragonolobus	-0.00513465	-0.0112219	0	15.7598	15.0894	2
Psydrax dicoccos	-0.00627959	-0.0140274	0	17.7996	15.0301	2
Pteris cretica	-0.00513465	-0.0112219	0	15.839	14.8836	2
Pteris vittata	-0.00513465	-0.0112219	0	16.0342	14.5887	2
Pterospermum canescens	-0.00513465	-0.0112219	0	15.9751	14.6608	2
Pterospermum lanceifolium	-0.00513465	-0.0112219	0	15.7845	14.8367	2
Pterospermum semisagittatum	-0.00513465	-0.0112219	0	15.8349	14.7587	2
Pterospermum suberifolium	-0.00513465	-0.0112219	0	16.0033	14.903	2
Pterospermum xylocarpum	-0.00513465	-0.0112219	0	15.9676	14.7583	2
Pulicaria salviifolia	-0.00513465	-0.0112219	0	16.0299	14.6216	2
Pulicaria undulata	-0.00513465	-0.0112219	0	15.9812	14.6831	2
Pyrola rotundifolia	-0.00513465	-0.0112219	0	16.0037	14.6774	2
Pyrus pashia	-0.00513465	-0.0112219	0	15.9975	14.8959	2
Quassia amara	-0.00513465	-0.0112219	0	15.9807	14.7288	2
Quercus ilex	-0.00513465	-0.0112219	0	15.9248	14.8123	2
Quercus incana	-0.00513465	-0.0112219	0	15.9807	14.8614	2
Quercus infectoria	-0.00513465	-0.0112219	0	16.0479	14.765	2
Quercus oblongata	-0.00513465	-0.0112219	0	16.0698	14.8979	2
Quillaja saponaria	-0.00513465	-0.0112219	0	15.8926	14.7378	2
Ranunculus sceleratus	-0.00513465	-0.0112219	0	15.9881	14.7334	2
Reseda luteola	-0.00513465	-0.0112219	0	16.0394	14.6914	2
Reynoutria multiflora	-0.00513465	-0.0112219	0	16.03	14.715	2
Rhamnus procumbens	-0.00513465	-0.0112219	0	15.9555	14.9052	2
Rhamnus triquetra	-0.00513465	-0.0112219	0	16.1508	14.7267	2
Rhamnus wightii	-0.00513465	-0.0112219	0	15.89	14.7739	2
Rhaponticum repens	-0.00513465	-0.0112219	0	16.0529	14.7342	2
Rhazya stricta	-0.00513465	-0.0112219	0	16.1	14.8253	2
Rheum emodi	-0.00513465	-0.0112219	0	15.9959	14.9586	2
Rheum officinale	-0.00513465	-0.0112219	0	16.14	14.7751	2
Rhinacanthus nasutus	-0.00513465	-0.0112219	0	16.1029	14.8227	2
Rhizophora apiculata	-0.00513465	-0.0112219	0	15.988	14.8588	2
Rhododendron barbatum	-0.00513465	-0.0112219	0	16.1391	15.2402	2
Rhododendron campanulatum	-0.00513465	-0.0112219	0	16.2099	15.3056	2
Rhododendron cinnabarinum	-0.00513465	-0.0112219	0	16.0774	15.2102	2
Rhododendron falconeri	-0.00513465	-0.0112219	0	16.1145	15.0739	2
Rhododendron niveum	-0.00513465	-0.0112219	0	16.041	14.9568	2
Rhododendron veitchianum	-0.00513465	-0.0112219	0	16.122	14.9507	2
Rhus chinensis	-0.00513465	-0.0112219	0	16.0543	15.0382	2
Rhus mysorensis	-0.00513465	-0.0112219	0	16.0029	14.8018	2
Rhus verniciflua	-0.00513465	-0.0112219	0	16.1743	14.912	2
Rhynchosia beddomei	-0.00513465	-0.0112219	0	16.241	14.9582	2
Rhynchosia bracteata	-0.00513465	-0.0112219	0	16.2236	15.001	2
Rhynchosia cana	-0.00513465	-0.0112219	0	16.0089	14.9546	2
Rhynchosia hirta	-0.00513465	-0.0112219	0	16.1878	15.2178	2
Rhynchosia rufescens	-0.00513465	-0.0112219	0	16.0596	14.8149	2
Rhynchosia suaveolens	-0.00513465	-0.0112219	0	16.1812	15.1607	2
Rosa chinensis	-0.00513465	-0.0112219	0	16.1147	15.0806	2
Rosa gallica	-0.00513465	-0.0112219	0	16.1179	15.0886	2
Rosa indica	-0.00513465	-0.0112219	0	16.1744	15.0715	2
Rotala mexicana	-0.00513465	-0.0112219	0	16.0075	14.9493	2
Roylea cinerea	-0.00513465	-0.0112219	0	16.0971	14.9307	2
Rubus foliolatus	-0.00513465	-0.0112219	0	16.3274	15.0559	2
Rubus idaeus	-0.00513465	-0.0112219	0	16.3866	15.0244	2
Rudbeckia hirta	-0.00513465	-0.0112219	0	16.1299	14.993	2
Rumex acetosella	-0.00513465	-0.0112219	0	16.3198	15.4177	2
Rumex chalepensis	-0.00513465	-0.0112219	0	16.1304	15.0606	2
Rumex crispus	-0.00513465	-0.0112219	0	16.0776	15.03	2
Rumex hastatus	-0.00513465	-0.0112219	0	16.2484	15.1647	2
Rumex maritimus	-0.00513465	-0.0112219	0	16.1085	15.0371	2
Rungia repens	-0.00513465	-0.0112219	0	16.3575	15.2611	2
Ruta angustifolia	-0.00513465	-0.0112219	0	16.402	15.1369	2
Salix lindleyana	-0.00513465	-0.0112219	0	16.555	15.3729	2
Salix nigra	-0.00513465	-0.0112219	0	16.3628	15.4599	2
Salix viminalis	-0.00513465	-0.0112219	0	16.4819	15.1731	2
Salvadora oleoides	-0.00513465	-0.0112219	0	16.2416	15.7283	2
Salvia coccinea	-0.00513465	-0.0112219	0	16.4263	15.4742	2
Salvia hians	-0.00513465	-0.0112219	0	16.3256	15.4679	2
Salvia miltiorrhiza	-0.00513465	-0.0112219	0	16.4595	15.2887	2
Salvia moorcroftiana	-0.00513465	-0.0112219	0	16.675	15.4612	2
Salvia palaestina	-0.00513465	-0.0112219	0	16.4609	15.4272	2
Salvia plebeia	-0.00513465	-0.0112219	0	16.2438	15.1945	2
Salvia tomentosa	-0.00513465	-0.0112219	0	16.3162	15.2266	2
Salvia verbenaca	-0.00513465	-0.0112219	0	16.2288	15.5307	2
Salvia virgata	-0.00513465	-0.0112219	0	16.4843	15.5411	2
Salvia viridis	-0.00513465	-0.0112219	0	16.4755	15.3154	2
Sambucus wightiana	-0.00513465	-0.0112219	0	16.4806	15.6274	2
Sansevieria cylindrica	-0.00513465	-0.0112219	0	16.4081	15.4255	2
Sarcostemma brevistigma	-0.00513465	-0.0112219	0	16.6358	15.756	2
Sassafras albidum	-0.00513465	-0.0112219	0	16.6428	15.6895	2
Satureja thymbra	-0.00513465	-0.0112219	0	16.355	15.325	2
Saussurea albescens	-0.00513465	-0.0112219	0	16.5519	15.7272	2
Saussurea gossypiphora	-0.00513465	-0.0112219	0	16.941	15.4052	2
Saussurea medusa	-0.00513465	-0.0112219	0	16.4165	15.358	2
Saussurea stella	-0.00513465	-0.0112219	0	16.8423	15.5369	2
Scandix pecten-veneris	-0.00513465	-0.0112219	0	16.5007	15.3376	2
Schima wallichii	-0.00513465	-0.0112219	0	16.521	15.4166	2
Schleichera oleosa	-0.00513465	-0.0112219	0	16.7413	15.6498	2
Sclerocarya birrea	-0.00513465	-0.0112219	0	16.7169	15.5632	2
Scleropyrum pentandrum	-0.00513465	-0.0112219	0	16.5952	15.687	2
Scorzonera hispanica	-0.00513465	-0.0112219	0	16.5982	15.3758	2
Scutia myrtina	-0.00513465	-0.0112219	0	16.7061	15.7112	2
Secale cereale	-0.00513465	-0.0112219	0	16.5072	15.2537	2
Sechium edule	-0.00513465	-0.0112219	0	16.7283	15.5074	2
Securigera securidaca	-0.00513465	-0.0112219	0	16.5704	15.4043	2
Sedum lineare	-0.00513465	-0.0112219	0	16.5413	15.4134	2
Selinum vaginatum	-0.00513465	-0.0112219	0	16.7377	15.6175	2
Semecarpus anacardium	-0.00513465	-0.0112219	0	16.5871	15.4131	2
Semecarpus kurzii	-0.00513465	-0.0112219	0	16.6401	15.4456	2
Sempervivum tectorum	-0.00513465	-0.0112219	0	17.0033	15.6079	2
Senecio nudicaulis	-0.00513465	-0.0112219	0	16.615	15.377	2
Senna alata	-0.00513465	-0.0112219	0	16.7871	15.6678	2
Senna alexandrina	-0.00513465	-0.0112219	0	16.7462	15.4326	2
Senna didymobotrya	-0.00513465	-0.0112219	0	16.8838	15.6546	2
Senna floribunda	-0.00513465	-0.0112219	0	16.682	15.6203	2
Senna hirsuta	-0.00513465	-0.0112219	0	16.8696	15.9009	2
Senna holosericea	-0.00513465	-0.0112219	0	16.8603	15.7515	2
Senna italica	-0.00513465	-0.0112219	0	16.597	15.6061	2
Senna montana	-0.00513465	-0.0112219	0	16.9456	15.8281	2
Senna multiglandulosa	-0.00513465	-0.0112219	0	16.7692	15.8264	2
Senna obtusifolia	-0.00513465	-0.0112219	0	16.6493	15.5803	2
Senna siamea	-0.00513465	-0.0112219	0	16.7601	15.4512	2
Senna sophera	-0.00513465	-0.0112219	0	16.7661	15.456	2
Senna surattensis	-0.00513465	-0.0112219	0	16.6943	15.4067	2
Senna timoriensis	-0.00513465	-0.0112219	0	16.9969	15.761	2
Serenoa repens	-0.00513465	-0.0112219	0	16.9073	15.7515	2
Silene latifolia	-0.00513465	-0.0112219	0	16.9236	15.9891	2
Simarouba amara	-0.00513465	-0.0112219	0	16.8807	15.5139	2
Simmondsia chinensis	-0.00513465	-0.0112219	0	16.9435	15.6638	2
Sinapis alba	-0.00513465	-0.0112219	0	16.9831	15.6311	2
Sisymbrium irio	-0.00513465	-0.0112219	0	16.8463	15.5329	2
Smilax glabra	-0.00513465	-0.0112219	0	17.1262	15.7732	2
Solanum asperolanatum	-0.00513465	-0.0112219	0	16.882	15.4779	2
Solanum elaeagnifolium	-0.00513465	-0.0112219	0	17.2762	15.6854	2
Solidago canadensis	-0.00513465	-0.0112219	0	17.1463	15.7897	2
Solidago virga-aurea	-0.00513465	-0.0112219	0	17.0929	15.6699	2
Solidago virgaurea	-0.00513465	-0.0112219	0	17.2461	15.6966	2
Sonchus asper	-0.00513465	-0.0112219	0	17.1474	15.6868	2
Sonchus oleraceus	-0.00513465	-0.0112219	0	17.0926	15.4728	2
Sophora moorcroftiana	-0.00513465	-0.0112219	0	17.1913	15.6403	2
Sparganium erectum	-0.00513465	-0.0112219	0	17.5026	15.6049	2
Spathodea campanulata	-0.00513465	-0.0112219	0	17.1002	15.7726	2
Spatholobus parviflorus	-0.00513465	-0.0112219	0	17.2592	15.8258	2
Spermacoce articularis	-0.00513465	-0.0112219	0	17.0385	15.687	2
Spermacoce pusilla	-0.00513465	-0.0112219	0	17.0411	15.6872	2
Spermacoce verticillata	-0.00513465	-0.0112219	0	17.065	15.4606	2
Sphaeranthus indicus	-0.00513465	-0.0112219	0	16.8287	15.5204	2
Sphaeranthus senegalensis	-0.00513465	-0.0112219	0	17.1142	15.5864	2
Sphagneticola trilobata	-0.00513465	-0.0112219	0	17.3586	15.6481	2
Spilanthes acmella	-0.00513465	-0.0112219	0	17.4519	15.7375	2
Spondias pinnata	-0.00513465	-0.0112219	0	17.2884	15.6621	2
Stachys byzantina	-0.00513465	-0.0112219	0	17.198	15.6428	2
Stachys lavandulifolia	-0.00513465	-0.0112219	0	17.0362	15.8591	2
Stachytarpheta mutabilis	-0.00513465	-0.0112219	0	17.363	15.6898	2
Stellaria aquatica	-0.00513465	-0.0112219	0	17.2117	15.727	2
Sterculia villosa	-0.00513465	-0.0112219	0	17.4314	15.8168	2
Stereospermum tetragonum	-0.00513465	-0.0112219	0	17.3209	15.7261	2
Striga asiatica	-0.00513465	-0.0112219	0	17.4483	15.6273	2
Strophanthus gratus	-0.00513465	-0.0112219	0	17.5147	15.5371	2
Strophanthus kombe	-0.00513465	-0.0112219	0	17.5385	15.4963	2
Styphnolobium japonicum	-0.00513465	-0.0112219	0	17.4659	15.6484	2
Styrax benzoin	-0.00513465	-0.0112219	0	17.4749	15.5223	2
Styrax tonkinensis	-0.00513465	-0.0112219	0	17.4472	15.7117	2
Suregada lanceolata	-0.00513465	-0.0112219	0	17.3135	15.5598	2
Syagrus romanzoffiana	-0.00513465	-0.0112219	0	17.291	15.5465	2
Symphorema involucratum	-0.00513465	-0.0112219	0	17.6127	15.5047	2
Symphyotrichum novae-angliae	-0.00513465	-0.0112219	0	17.7661	15.4572	2
Syringa vulgaris	-0.00513465	-0.0112219	0	17.9401	14.8603	2
Syzygium alternifolium	-0.00513465	-0.0112219	0	17.9164	15.2689	2
Syzygium zeylanicum	-0.00513465	-0.0112219	0	17.4591	15.3902	2
Tabebuia aurea	-0.00513465	-0.0112219	0	17.2838	15.4232	2
Tagetes tenuifolia	-0.00513465	-0.0112219	0	17.6963	14.7279	2
Tagetes terniflora	-0.00513465	-0.0112219	0	17.6864	15.4763	2
Tamarix aphylla	-0.00513465	-0.0112219	0	17.8829	15.2172	2
Tamarix dioica	-0.00513465	-0.0112219	0	17.7932	15.3235	2
Tamarix gallica	-0.00513465	-0.0112219	0	17.6829	14.7668	2
Tamarix indica	-0.00513465	-0.0112219	0	17.7256	15.5148	2
Tanacetum cinerariifolium	-0.00513465	-0.0112219	0	17.7325	15.477	2
Tanacetum dolichophyllum	-0.00513465	-0.0112219	0	17.9278	14.5569	2
Tanacetum gracile	-0.00513465	-0.0112219	0	17.7861	15.5446	2
Tanacetum nubigenum	-0.00513465	-0.0112219	0	17.3157	15.5784	2
Tarchonanthus camphoratus	-0.00513465	-0.0112219	0	17.6531	15.2646	2
Tecoma stans	-0.00513465	-0.0112219	0	17.2455	15.4803	2
Tecomella undulata	-0.00513465	-0.0112219	0	17.3773	15.5109	2
Tectona grandis	-0.00513465	-0.0112219	0	17.6387	15.377	2
Tephrosia candida	-0.00513465	-0.0112219	0	17.4634	15.4621	2
Tephrosia vogelii	-0.00513465	-0.0112219	0	17.4761	15.2592	2
Terminalia alata	-0.00513465	-0.0112219	0	17.8371	15.4911	2
Terminalia pallida	-0.00513465	-0.0112219	0	17.6632	15.2007	2
Terminalia tomentosa	-0.00513465	-0.0112219	0	18.0058	15.1855	2
Tetraclinis articulata	-0.00513465	-0.0112219	0	17.995	15.1299	2
Tetradenia riparia	-0.00513465	-0.0112219	0	18.2111	14.8501	2
Tetraena simplex	-0.00513465	-0.0112219	0	18.0313	14.5732	2
Tetragonia tetragonioides	-0.00513465	-0.0112219	0	17.9363	14.938	2
Teucrium polium	-0.00513465	-0.0112219	0	17.8313	15.0403	2
Teucrium quadrifarium	-0.00513465	-0.0112219	0	18.1474	14.6256	2
Teucrium scordium	-0.00513465	-0.0112219	0	17.976	14.8667	2
Thalictrum pedunculatum	-0.00513465	-0.0112219	0	17.871	14.5341	2
Thespesia lampas	-0.00513465	-0.0112219	0	18.2053	14.6428	2
Thespesia populnea	-0.00724207	-0.0159303	0	16.672	14.7471	2
Thuja koraiensis	-0.00513465	-0.0112219	0	17.6033	14.8906	2
Thuja plicata	-0.00513465	-0.0112219	0	17.8883	14.7408	2
Thunbergia laurifolia	-0.00513465	-0.0112219	0	17.7883	14.756	2
Thymus fedtschenkoi	-0.00513465	-0.0112219	0	18.3958	14.5848	2
Thymus linearis	-0.00513465	-0.0112219	0	17.7972	14.9601	2
Thymus migricus	-0.00513465	-0.0112219	0	17.9261	14.9102	2
Thymus praecox	-0.00513465	-0.0112219	0	17.8651	14.4814	2
Thymus pulegioides	-0.00513465	-0.0112219	0	17.8295	15.0735	2
Toona ciliata	-0.00513465	-0.0112219	0	18.1108	14.6036	2
Torenia concolor	-0.00513465	-0.0112219	0	17.8312	15.0603	2
Torilis arvensis	-0.00513465	-0.0112219	0	17.774	14.755	2
Torilis japonica	-0.00513465	-0.0112219	0	18.1707	14.3935	2
Torilis leptophylla	-0.00513465	-0.0112219	0	17.6398	14.6459	2
Toxicodendron wallichii	-0.00513465	-0.0112219	0	17.7686	14.5777	2
Trachelospermum asiaticum	-0.00513465	-0.0112219	0	17.799	14.5549	2
Trachelospermum lucidum	-0.00513465	-0.0112219	0	17.7922	14.3116	2
Tradescantia virginiana	-0.00513465	-0.0112219	0	17.9321	13.629	2
Tragopogon porrifolius	-0.00513465	-0.0112219	0	17.9735	14.38	2
Trema orientalis	-0.00513465	-0.0112219	0	17.9169	14.21	2
Triadica sebifera	-0.00513465	-0.0112219	0	17.6101	14.7537	2
Tribulus pentandrus	-0.00513465	-0.0112219	0	17.7904	14.5997	2
Trichodesma indicum	-0.00513465	-0.0112219	0	18.2305	14.5825	2
Trichodesma zeylanicum	-0.00513465	-0.0112219	0	17.6712	14.3305	2
Trichosanthes dioica	-0.00513465	-0.0112219	0	18.183	14.416	2
Trichosanthes nervifolia	-0.00513465	-0.0112219	0	17.5465	14.4954	2
Tridax procumbens	-0.00513465	-0.0112219	0	17.9164	14.4696	2
Trigonella balansae	-0.00513465	-0.0112219	0	17.7586	14.5597	2
Trigonella occulta	-0.00513465	-0.0112219	0	17.8611	14.1487	2
Triumfetta rhomboidea	-0.00513465	-0.0112219	0	17.7732	14.4707	2
Tropaeolum majus	-0.00513465	-0.0112219	0	18.0089	14.1112	2
Tropaeolum minus	-0.00513465	-0.0112219	0	17.8597	14.3218	2
Typha elephantina	-0.00513465	-0.0112219	0	17.7517	14.5854	2
Typhonium trilobatum	-0.00513465	-0.0112219	0	18.0434	13.8965	2
Uncaria gambir	-0.00513465	-0.0112219	0	17.7024	14.2755	2
Urena lobata	-0.00513465	-0.0112219	0	17.6797	14.2508	2
Urtica pilulifera	-0.00513465	-0.0112219	0	18.2243	14.1656	2
Urtica urens	-0.00513465	-0.0112219	0	17.9292	14.4065	2
Uvaria narum	-0.00513465	-0.0112219	0	18.0428	14.1091	2
Vaccaria hispanica	-0.00513465	-0.0112219	0	17.6618	14.2185	2
Vaccinium corymbosum	-0.00513465	-0.0112219	0	17.5234	14.1546	2
Vaccinium myrtillus	-0.00513465	-0.0112219	0	17.9247	14.0632	2
Vallaris solanacea	-0.00513465	-0.0112219	0	17.5949	14.0899	2
Vallisneria spiralis	-0.00513465	-0.0112219	0	17.9141	14.1418	2
Vanda tessellata	-0.00513465	-0.0112219	0	17.6813	14.0859	2
Vanilla planifolia	-0.00513465	-0.0112219	0	17.5709	14.0201	2
Vateria indica	-0.00513465	-0.0112219	0	17.6586	14.1846	2
Ventilago denticulata	-0.00513465	-0.0112219	0	17.9651	14.1617	2
Verbascum thapsus	-0.00513465	-0.0112219	0	17.6858	14.0218	2
Verbesina encelioides	-0.00513465	-0.0112219	0	17.6943	14.0118	2
Vernicia fordii	-0.00513465	-0.0112219	0	17.9687	14.0732	2
Vernicia montana	-0.00513465	-0.0112219	0	17.8929	13.8068	2
Veronica anagallis	-0.00513465	-0.0112219	0	17.5144	13.9047	2
Veronica beccabunga	-0.00513465	-0.0112219	0	17.9513	14.0311	2
Viburnum cylindricum	-0.00513465	-0.0112219	0	17.7154	13.974	2
Viburnum grandiflorum	-0.00513465	-0.0112219	0	17.8826	14.1866	2
Vigna aconitifolia	-0.00513465	-0.0112219	0	17.7884	13.9758	2
Vigna trilobata	-0.00513465	-0.0112219	0	17.7518	13.9806	2
Vinca major	-0.00513465	-0.0112219	0	17.604	13.8528	2
Vincetoxicum hirundinaria	-0.00513465	-0.0112219	0	17.9482	14.2644	2
Vitex agnus-castus	-0.00513465	-0.0112219	0	17.3683	13.4785	2
Vitex altissima	-0.00513465	-0.0112219	0	17.5889	14.085	2
Vitex peduncularis	-0.00513465	-0.0112219	0	17.2767	13.5943	2
Vitex pinnata	-0.00513465	-0.0112219	0	17.4905	13.8738	2
Vitex trifolia	-0.00513465	-0.0112219	0	17.7394	13.6929	2
Waltheria indica	-0.00724207	-0.0159303	0	16.631	14.7543	2
Wisteria sinensis	-0.00513465	-0.0112219	0	17.4647	13.8019	2
Withania coagulans	-0.00513465	-0.0112219	0	17.6989	13.9518	2
Wollastonia biflora	-0.00513465	-0.0112219	0	17.55	13.9134	2
Wrightia arborea	-0.00513465	-0.0112219	0	17.4449	13.6286	2
Wrightia tinctoria	-0.00513465	-0.0112219	0	17.4211	13.5708	2
Xanthium orientale	-0.00513465	-0.0112219	0	16.1921	13.6842	2
Xanthium spinosum	-0.00513465	-0.0112219	0	17.5114	13.9472	2
Xanthium strumarium	-0.00513465	-0.0112219	0	17.3672	13.7175	2
Ximenia americana	-0.00513465	-0.0112219	0	17.1932	13.5955	2
Xylia xylocarpa	-0.00513465	-0.0112219	0	17.4171	13.8787	2
Xylocarpus granatum	-0.00513465	-0.0112219	0	16.1544	13.7211	2
Xylopia aethiopica	-0.00513465	-0.0112219	0	17.2069	13.5756	2
Youngia japonica	-0.00513465	-0.0112219	0	17.3092	13.487	2
Yucca gloriosa	-0.00513465	-0.0112219	0	17.0328	13.5311	2
Zanonia indica	-0.00513465	-0.0112219	0	17.0955	13.6118	2
Zantedeschia aethiopica	-0.00513465	-0.0112219	0	17.3849	13.7205	2
Zanthoxylum budrunga	-0.00513465	-0.0112219	0	16.2317	13.5888	2
Zanthoxylum limonella	-0.00513465	-0.0112219	0	17.0404	13.556	2
Zingiber chrysanthum	-0.00513465	-0.0112219	0	16.8664	13.62	2
Zinnia elegans	-0.00513465	-0.0112219	0	16.492	13.4426	2
Ziziphora capitata	-0.00513465	-0.0112219	0	17.0752	13.5471	2
Zosima absinthifolia	-0.00513465	-0.0112219	0	16.8557	13.5681	2
Zygophyllum propinquum	-0.00627959	-0.0140274	0	17.8761	15.0888	2
Berberis aristata	0.179556	-0.00342978	0	-2.46139	5.63777	4
Berberis asiatica	0.179556	-0.00342978	0	-2.45738	5.68209	4
Berberis brandisiana	0.167223	-0.00183078	0	-2.85161	5.68074	4
Berberis chitria	0.207644	-0.00139448	0	-2.45571	5.61506	4
Berberis concinna	0.167223	-0.00183078	0	-2.8293	5.69225	4
Berberis coriaria	0.0343802	-0.0128401	0	-2.44297	5.60615	4
Berberis floribunda	0.207644	-0.00139448	0	-2.45578	5.6143	4
Berberis lambertii	0.207644	-0.00139448	0	-2.42966	5.61849	4
Berberis lycium	0.114891	-0.00581251	0	-2.6222	5.66364	4
Berberis orthobotrys	0.0343802	-0.0128401	0	-2.4511	5.60543	4
Berberis petiolaris	0.114891	-0.00581251	0	-2.65473	5.6664	4
Berberis pseudumbellata	0.137988	-0.00626451	0	-2.41911	5.59782	4
Berberis tinctoria	0.235589	0.0026451	0	-2.8671	5.57633	4
Berberis virescens	0.163036	-0.00101179	0	-2.90698	5.53821	4
Berberis vulgaris	0.185737	-0.0190106	0	-2.47153	5.6064	4
Berberis wallichiana	0.0343802	-0.0128401	0	-2.43878	5.58643	4
Cocculus pendulus	0.116948	-0.00588561	0	-2.93703	5.60001	4
Coptis teeta	0.235589	0.0026451	0	-2.84396	5.57198	4
Coscinium fenestratum	0.235589	0.0026451	0	-2.86728	5.57507	4
Fibraurea tinctoria	0.186422	-0.00117593	0	-2.4939	5.66221	4
Jateorhiza palmata	0.188621	-0.00120262	0	-2.9251	5.61493	4
Mahonia napaulensis	0.163036	-0.00101179	0	-2.91569	5.53459	4
Momordica cochinchinensis	0.0128274	-0.0119322	0	-2.95195	5.60679	4
Mukia maderaspatana	0.0128274	-0.0119322	0	-2.93638	5.62462	4
Solena amplexicaulis	0.0128274	-0.0119322	0	-2.92752	5.61412	4
Anisodus luridus	-0.0254526	-0.0536298	0	13.1174	-13.5383	5
Brugmansia candida	-0.0254526	-0.0536298	0	13.1302	-13.5067	5
Brugmansia suaveolens	-0.0254526	-0.0536298	0	13.1151	-13.5227	5
Cestrum parqui	-0.0217981	-0.0470139	0	13.1559	-13.4525	5
Cyphomandra betacea	-0.0359653	-0.0539786	0	13.096	-13.468	5
Datura ferox	-0.0254526	-0.0536298	0	13.1166	-13.5214	5
Datura innoxia	-0.0254526	-0.0536298	0	13.1155	-13.5226	5
Datura metel	-0.0254526	-0.0536298	0	13.1232	-13.5144	5
Datura quercifolia	-0.0254526	-0.0536298	0	13.1329	-13.5064	5
Ferula assa-foetida	-0.0242012	-0.0472823	0	13.1584	-13.4652	5
Hyoscyamus albus	-0.0254526	-0.0536298	0	13.1346	-13.5158	5
Hyoscyamus muticus	-0.0254526	-0.0536298	0	13.1178	-13.5215	5
Hyoscyamus pusillus	-0.0254526	-0.0536298	0	13.0961	-13.5441	5
Hyoscyamus reticulatus	-0.0254526	-0.0536298	0	13.1168	-13.5234	5
Lycium barbarum	-0.0254526	-0.0536298	0	13.1214	-13.5172	5
Mandragora officinarum	-0.0254526	-0.0536298	0	13.1173	-13.5212	5
Morinda pubescens	-0.0254526	-0.0536298	0	13.1286	-13.5099	5
Orobanche aegyptiaca	-0.0254526	-0.0536298	0	13.1175	-13.5212	5
Orobanche ramosa	-0.0254526	-0.0536298	0	13.138	-13.5003	5
Physochlaina praealta	-0.0254526	-0.0536298	0	13.0674	-13.5709	5
Rubia cordifolia	-0.0094219	-0.0215203	0	14.0146	-11.6787	5
Strobilanthes callosus	-0.00725882	-0.016627	0	14.1164	-11.6112	5
Strychnos aenea	-0.00725882	-0.016627	0	14.1178	-11.6099	5
Strychnos colubrina	-0.00962647	-0.0222313	0	14.0915	-11.6362	5
Strychnos ignatii	-0.00962647	-0.0222313	0	14.1435	-11.5836	5
Strychnos malaccensis	-0.00962647	-0.0222313	0	14.1167	-11.611	5
Strychnos nux-vomica	-0.00962647	-0.0222313	0	14.1168	-11.6108	5
Strychnos potatorum	-0.00962647	-0.0222313	0	14.1126	-11.6154	5
Strychnos wallichiana	-0.00962647	-0.0222313	0	14.1116	-11.6161	5
Viscum monoicum	-0.00962647	-0.0222313	0	14.1191	-11.6089	5
Alangium salviifolium	-0.00475158	-0.0132032	0	4.27628	2.40953	6
Arisaema tortuosum	-0.00491392	-0.0158363	0	4	2.38391	6
Canscora alata	-0.00807081	-0.0164868	0	4.80234	2.91781	6
Carapichea ipecacuanha	-0.00894285	-0.0159168	0	4.51756	2.50825	6
Colchicum autumnale	-0.00695426	-0.0153228	0	3.82681	2.29674	6
Colchicum luteum	-0.00695426	-0.0153228	0	3.81895	2.29569	6
Corydalis ophiocarpa	-0.00304095	-0.0136632	0	4.11017	2.41635	6
Crocus sativus	-0.020083	-0.0289154	0	3.81324	2.28888	6
Dipsacus inermis	-0.00908641	-0.0177987	0	4.70523	2.77185	6
Enicostema axillare	-0.0118497	-0.0232731	0	4.86072	2.99694	6
Exacum tetragonum	-0.00767216	-0.0163119	0	4.97788	3.16106	6
Gentiana kurroo	-0.0106537	-0.0215502	0	4.85952	2.9974	6
Gentiana lutea	-0.0308725	-0.0446238	0	4.86616	3.00965	6
Gentiana olivieri	-0.00900111	-0.0185417	0	4.90393	3.06006	6
Gentiana pedicellata	-0.007047	-0.0153069	0	4.75896	2.85884	6
Gentiana tibetica	-0.00767216	-0.0163119	0	4.98221	3.1661	6
Gentianopsis detonsa	-0.00767216	-0.0163119	0	4.97014	3.15432	6
Gloriosa superba	-0.00695426	-0.0153228	0	3.80911	2.29174	6
Hedera helix	-0.0176349	-0.0247162	0	4.46032	2.36472	6
Hedera nepalensis	-0.00668661	-0.0115827	0	4.44564	2.4114	6
Hedera rhombea	-0.00668661	-0.0115827	0	4.44108	2.40217	6
Hemerocallis fulva	-0.0338693	-0.0589795	0	4.71124	2.70862	6
Hunteria zeylanica	-0.00807081	-0.0164868	0	4.83243	2.94961	6
Iphigenia indica	-0.00695426	-0.0153228	0	3.82588	2.29698	6
Jaeschkea gentianoides	-0.00807081	-0.0164868	0	4.82744	2.94536	6
Lamprocapnos spectabilis	0.104588	-0.00723386	0	4.07377	2.44078	6
Lonicera angustifolia	-0.00908641	-0.0177987	0	4.69405	2.74862	6
Lonicera quinquelocularis	-0.00908641	-0.0177987	0	4.69503	2.7501	6
Menyanthes trifoliata	-0.0155972	-0.0050056	0	4.7679	2.85362	6
Misopates orontium	-0.00304095	-0.0136632	0	4.12273	2.4171	6
Salvia officinalis	-0.0217693	-0.0214388	0	5.0015	3.18976	6
Saussurea simpsoniana	-0.00695426	-0.0153228	0	3.80677	2.29108	6
Swertia alata	-0.007047	-0.0153069	0	4.75767	2.85741	6
Swertia angustifolia	-0.00923872	-0.018708	0	4.73192	2.81751	6
Swertia chirata	-0.00891934	-0.0184598	0	4.89593	3.04533	6
Swertia chirayita	-0.0103544	-0.0207322	0	4.88009	3.02767	6
Swertia ciliata	-0.00854119	-0.017807	0	4.82866	2.94577	6
Swertia nervosa	-0.00923872	-0.018708	0	4.73334	2.82068	6
Swertia perennis	-0.00767216	-0.0163119	0	4.97802	3.16127	6
Tylophora indica	-0.0152326	0.065024	0	4.47209	2.36577	6
Azima tetracantha	-0.0430738	-0.0784856	0	8.93188	-9.51225	7
Balanites roxburghii	-0.0430738	-0.0784856	0	8.93861	-9.50729	7
Bupleurum hamiltonii	-0.0430738	-0.0784856	0	8.93912	-9.50806	7
Calendula arvensis	-0.0430738	-0.0784856	0	8.91798	-9.52784	7
Calendula officinalis	-0.0687441	-0.10568	0	8.94374	-9.49578	7
Calotropis gigantea	-0.0430738	-0.0784856	0	8.92969	-9.51843	7
Cicuta virosa	-0.0316061	-0.0497316	0	8.93278	-9.51325	7
Cucurbita maxima	-0.0530349	-0.0955179	0	9.06431	-9.37841	7
Cucurbita pepo	-0.0430738	-0.0784856	0	8.92465	-9.51448	7
Heteropappus altaicus	-0.0325539	-0.042506	0	8.94967	-9.4969	7
Lathyrus aphaca	-0.0430738	-0.0784856	0	8.93346	-9.52572	7
Lilium candidum	-0.0430738	-0.0784856	0	8.93734	-9.50863	7
Opuntia elatior	-0.0430738	-0.0784856	0	8.9257	-9.52082	7
Ruscus aculeatus	-0.0430738	-0.0784856	0	8.91699	-9.50635	7
Salsola collina	-0.0430738	-0.0784856	0	8.9347	-9.50811	7
Salsola kali	-0.0430738	-0.0784856	0	8.93633	-9.50888	7
Selenicereus grandiflorus	-0.0430738	-0.0784856	0	8.95656	-9.48872	7
Sparganium stoloniferum	-0.0311794	-0.0568045	0	8.98773	-9.45545	7
Typha domingensis	-0.0430738	-0.0784856	0	8.92672	-9.52563	7
Urtica dioica	-0.0430738	-0.0784856	0	8.91769	-9.53033	7
Aesculus hippocastanum	-0.0305926	-0.0320737	0	12.6658	-7.54003	8
Allamanda blanchetii	-0.0203593	-0.0479103	0	12.7022	-7.57071	8
Allamanda cathartica	-0.0188974	-0.0375836	0	12.6966	-7.54585	8
Artocarpus chama	-0.0171659	-0.0273337	0	12.1418	-7.36696	8
Bolboschoenus glaucus	-0.0171659	-0.0273337	0	12.131	-7.35649	8
Caesalpinia decapetala	-0.0171659	-0.0273337	0	12.1564	-7.37284	8
Cosmos bipinnatus	-0.0203593	-0.0479103	0	12.7125	-7.55964	8
Eriolaena hookeriana	-0.0203593	-0.0479103	0	12.6944	-7.56141	8
Gliricidia sepium	-0.0514645	-0.0829423	0	12.6971	-7.56261	8
Grevillea robusta	-0.00856439	-0.0165503	0	11.7171	-7.14644	8
Helicteres isora	-0.020815	-0.047824	0	12.6652	-7.68083	8
Hibiscus tilliaceus	-0.0203593	-0.0479103	0	12.7211	-7.57539	8
Hydrangea macrophylla	-0.0203593	-0.0479103	0	12.7198	-7.58677	8
Ichnocarpus frutescens	-0.0203593	-0.0479103	0	12.7077	-7.57907	8
Juniperus polycarpos	-0.0171659	-0.0273337	0	12.1581	-7.37165	8
Melochia corchorifolia	-0.0203593	-0.0479103	0	12.7107	-7.57296	8
Panicum miliaceum	-0.0203593	-0.0479103	0	12.7014	-7.57173	8
Phoenix dactylifera	-0.0415659	-0.0688635	0	12.1243	-7.36129	8
Pinus sylvestris	-0.032136	-0.0500961	0	12.5675	-7.52099	8
Pterolobium hexapetalum	-0.0171659	-0.0273337	0	12.1596	-7.37508	8
Pterospermum acerifolium	-0.0203593	-0.0479103	0	12.6995	-7.57015	8
Pyrrosia lingua	-0.0203593	-0.0479103	0	12.6895	-7.57211	8
Rheum palmatum	-0.0171659	-0.0273337	0	12.1599	-7.37448	8
Rheum rhaponticum	-0.0171659	-0.0273337	0	12.159	-7.37397	8
Rosa damascena	-0.0458086	-0.0901183	0	12.7245	-7.58854	8
Rubus ulmifolius	-0.0203593	-0.0479103	0	12.7005	-7.57166	8
Sapindus emarginatus	-0.0203593	-0.0479103	0	12.7033	-7.56679	8
Sapindus laurifolius	-0.0203593	-0.0479103	0	12.6976	-7.56477	8
Sesbania sesban	0.0103753	-0.0161373	0	11.6393	-6.24061	8
Smilax aspera	-0.0171659	-0.0273337	0	12.1448	-7.36759	8
Smilax china	-0.0136005	-0.0233526	0	12.1462	-7.36962	8
Sorghum bicolor	-0.0155038	-0.0256707	0	12.0624	-7.32974	8
Angelica glauca	-0.0212463	0.0873083	0	14.2904	-2.13299	9
Canavalia africana	-0.0423642	-0.0138605	0	13.4426	-2.97915	9
Canavalia gladiata	-0.0423642	-0.0138605	0	13.4522	-2.9704	9
Canavalia rosea	-0.0423642	-0.0138605	0	13.4472	-2.97634	9
Desmodium gangeticum	-0.0423642	-0.0138605	0	13.4549	-2.97209	9
Desmodium oojeinense	-0.0423642	-0.0138605	0	13.4433	-2.98063	9
Gymnema montanum	-0.0423642	-0.0138605	0	13.453	-2.97162	9
Juniperus virginiana	-0.00936819	0.00603335	0	13.6474	-1.15688	9
Linum usitatissimum	-0.0100635	-0.00664362	0	13.6196	-1.18785	9
Pimpinella diversifolia	-0.0212463	0.0873083	0	14.2951	-2.08594	9
Piscidia piscipula	-0.0423642	-0.0138605	0	13.4591	-2.96815	9
Pueraria phaseoloides	-0.0423642	-0.0138605	0	13.4509	-2.97232	9
Sinopodophyllum hexandrum	-0.00936819	0.00603335	0	13.6804	-1.15773	9
Stellaria media	-0.0423642	-0.0138605	0	13.4424	-2.98241	9
Trifolium alexandrinum	-0.0423642	-0.0138605	0	13.4545	-2.97262	9
Ulex europaeus	-0.0423642	-0.0138605	0	13.4371	-2.99075	9
Acorus calamus	-0.00995446	0.00110519	0	8.77381	-0.460724	10
Acorus gramineus	-0.0115923	-0.0121079	0	8.36386	-0.361066	10
Alliaria petiolata	-0.0121111	-0.023458	0	7.58435	0.0243312	10
Allium chinense	-0.0176204	-0.0273204	0	7.85707	-0.4092	10
Allium sativum	-0.0163889	-0.0280556	0	7.73355	-0.29549	10
Allium tuberosum	-0.0147402	-0.0252153	0	7.8704	-0.418248	10
Aristolochia fontanesii	0.0480835	-0.0097835	0	8.91914	0.0329315	10
Aristolochia reticulata	0.0480835	-0.0097835	0	8.95029	0.0600485	10
Aristolochia rotunda	0.0480835	-0.0097835	0	8.93201	0.0432834	10
Aristolochia serpentaria	0.0480835	-0.0097835	0	8.93474	0.044227	10
Aristolochia tagala	0.0480835	-0.0097835	0	8.93407	0.0453067	10
Armoracia rusticana	-0.0147741	-0.0268802	0	7.68484	-0.215195	10
Asarum europaeum	0.0162596	-0.0248479	0	8.67788	-0.231383	10
Barbarea vulgaris	-0.00933467	-0.0194615	0	7.52112	0.140898	10
Brassica juncea	-0.0147741	-0.0268802	0	7.69674	-0.235189	10
Brassica napus	-0.0124622	-0.023487	0	7.66333	-0.128752	10
Brassica nigra	-0.0170781	-0.0297653	0	7.6658	-0.248816	10
Brassica oleracea	-0.0353875	-0.0560348	0	7.66068	-0.2102	10
Brassica rapa	-0.0185577	-0.0311837	0	7.64245	-0.150025	10
Caesulia axillaris	-0.00811657	-0.00369481	0	8.58562	-0.355102	10
Capparis sepiaria	-0.00684586	-0.014125	0	7.59457	-0.158555	10
Capparis spinosa	-0.025147	-0.0192171	0	7.58584	-0.158486	10
Capsella bursa-pastoris	-0.0359513	-0.037076	0	7.63967	-0.00237488	10
Cardamine pratensis	-0.00674675	-0.0150782	0	7.52152	0.147675	10
Cleome gynandra	-0.00684586	-0.014125	0	7.59531	-0.151769	10
Cocculus orbiculatus	0.0480835	-0.0097835	0	8.93623	0.050724	10
Crambe maritima	-0.00958987	-0.0192061	0	7.62485	-0.0186815	10
Descurainia sophia	-0.0115019	-0.0210319	0	7.91525	-0.388998	10
Equisetum palustre	-0.0110586	-0.0205993	0	7.75352	-0.319812	10
Eruca vesicaria	-0.0244328	-0.0336957	0	7.92557	-0.393434	10
Farsetia aegyptia	-0.00674675	-0.0150782	0	7.49247	0.176016	10
Farsetia jacquemontii	-0.00674675	-0.0150782	0	7.491	0.179745	10
Farsetia stylosa	-0.00674675	-0.0150782	0	7.47475	0.197282	10
Isatis tinctoria	-0.0210852	-0.0290455	0	7.783	-0.422863	10
Lepidium latifolium	-0.0115019	-0.0210319	0	7.90075	-0.37946	10
Leptospermum petersonii	-0.0115019	-0.0210319	0	7.91069	-0.389413	10
Raphanus raphanistrum	-0.0110586	-0.0205993	0	7.75822	-0.336702	10
Salvadora persica	-0.00958987	-0.0192061	0	7.59802	0.0119532	10
Satureja hortensis	-0.0174445	-0.00209276	0	7.76011	-0.321689	10
Satureja montana	-0.024512	-0.0245268	0	7.74654	-0.335574	10
Sisymbrium orientale	-0.00674675	-0.0150782	0	7.4882	0.194103	10
Thlaspi arvense	-0.00958987	-0.0192061	0	7.6275	-0.0228226	10
Thymus serpyllum	-0.0292283	-0.02519	0	7.73351	-0.324119	10
Thymus vulgaris	-0.0299048	-0.0166062	0	7.74448	-0.431315	10
Zingiber montanum	-0.00811657	-0.00369481	0	8.58903	-0.360826	10
Abelmoschus moschatus	-0.0158951	-0.0533311	0	10.9835	-5.42191	11
Achyranthes aspera	-0.00804231	-0.016991	0	10.5367	-4.9223	11
Allium ascalonicum	-0.0171609	-0.0643046	0	11.1322	-5.32245	11
Allium cepa	-0.0304072	-0.0549897	0	11.0367	-5.29708	11
Antirrhinum majus	0.00117825	-0.0463235	0	10.9945	-5.40252	11
Artocarpus altilis	-0.00951955	-0.0199215	0	10.7852	-4.758	11
Bauhinia variegata	-0.0312193	-0.0182072	0	11.2062	-4.76268	11
Brownea ariza	0.00117825	-0.0463235	0	10.988	-5.42671	11
Cedrus deodara	-0.0214541	-0.0388174	0	11.2632	-5.09649	11
Cochlospermum vitifolium	-0.0288756	-0.0512668	0	11.2827	-5.16644	11
Colocasia esculenta	-0.015733	-0.0525344	0	10.9294	-5.38441	11
Dianthus caryophyllus	0.00117825	-0.0463235	0	10.9805	-5.41622	11
Diploknema butyracea	-0.0221577	-0.0406131	0	10.6104	-4.91754	11
Drimia maritima	-0.0171609	-0.0643046	0	11.1857	-5.26489	11
Drimys winteri	-0.0288756	-0.0512668	0	11.2573	-5.19497	11
Erodium cicutarium	-0.0095128	-0.0277907	0	10.8311	-5.34439	11
Euphorbia pulcherrima	0.00117825	-0.0463235	0	10.9816	-5.41318	11
Galinsoga parviflora	-0.028715	-0.0378799	0	11.1652	-4.73599	11
Garcinia indica	0.00117825	-0.0463235	0	10.9828	-5.41898	11
Hagenia abyssinica	0.00117825	-0.0463235	0	10.9869	-5.40568	11
Hibiscus sabdariffa	0.00117825	-0.0463235	0	11.0115	-5.39685	11
Indigofera hebepetala	-0.0368175	-0.0548847	0	10.8237	-4.71438	11
Lannea coromandelica	-0.00951955	-0.0199215	0	10.7899	-4.74388	11
Litchi chinensis	-0.0196137	-0.0528005	0	10.9393	-5.43143	11
Lycoris radiata	0.00117825	-0.0463235	0	10.9733	-5.42552	11
Machilus gamblei	-0.00951955	-0.0199215	0	10.7828	-4.74957	11
Maclura cochinchinensis	-0.0288756	-0.0512668	0	11.2553	-5.19229	11
Maclura pomifera	-0.0151498	-0.0171758	0	10.7939	-4.65971	11
Madhuca longifolia	-0.0347354	-0.0639822	0	10.5924	-4.89127	11
Matthiola incana	-0.0152662	-0.0104107	0	11.037	-4.4375	11
Morus alba	-0.0163711	-0.0283931	0	10.8813	-4.87352	11
Persicaria lapathifolia	-0.0152662	-0.0104107	0	11.0506	-4.43901	11
Persicaria orientalis	-0.0288756	-0.0512668	0	11.2674	-5.18136	11
Petiveria alliacea	-0.0288756	-0.0512668	0	11.2949	-5.16205	11
Pistacia chinensis	-0.0288756	-0.0512668	0	11.2708	-5.17747	11
Pistia stratiotes	-0.0284199	-0.0834749	0	10.9761	-5.4253	11
Polyscias scutellaria	-0.00804231	-0.016991	0	10.564	-4.91172	11
Putranjiva roxburghii	-0.0196372	-0.024358	0	10.3512	-4.89819	11
Rhododendron anthopogon	-0.0288756	-0.0512668	0	11.2701	-5.17543	11
Rhododendron formosum	-0.0288756	-0.0512668	0	11.2852	-5.16854	11
Rhododendron grande	-0.0288756	-0.0512668	0	11.2826	-5.17157	11
Sambucus canadensis	0.00117825	-0.0463235	0	10.9767	-5.45472	11
Sesbania grandiflora	0.00117825	-0.0463235	0	10.9533	-5.44975	11
Smilax aristolochiifolia	-0.0288756	-0.0512668	0	11.289	-5.16861	11
Toxicodendron hookeri	-0.0288756	-0.0512668	0	11.2746	-5.20228	11
Trachelospermum jasminoides	-0.0288756	-0.0512668	0	11.2823	-5.16692	11
Vigna mungo	-0.0230886	-0.0346969	0	10.8583	-5.02794	11
Vitex negundo	-0.0154814	-0.000558652	0	11.0463	-4.40619	11
Ziziphus nummularia	-0.0288756	-0.0512668	0	11.2834	-5.19105	11
Acacia pubescens	-0.0193342	-0.019235	0	11.6362	-4.24129	12
Acalypha wilkesiana	-0.0147	-0.018717	0	11.8638	-2.49664	12
Albizia julibrissin	-0.0178843	-0.0147123	0	11.778	-2.99906	12
Albizia procera	-0.0410823	-0.00778278	0	12.3895	-3.26731	12
Anacyclus pyrethrum	-0.0359447	-0.0118629	0	12.3706	-3.18273	12
Andira inermis	-0.048197	-0.0314179	0	12.3385	-3.35517	12
Arctium lappa	-0.0368148	-0.0304525	0	11.8457	-2.48842	12
Broussonetia papyrifera	-0.00643373	-0.0130388	0	11.357	-2.8491	12
Cajanus cajan	-0.0353196	-0.0173777	0	12.2099	-3.31815	12
[truncated: 628 more rows]

## Sheet: Supp_Table_8
compound	cluster	in_cluster_count	out_cluster_count	odds_ratio	pvalue	adj_pvalue
(1S,2R,3R,4S,5R,6S,8R,9S,13S,16S,17R,18S)-11-ethyl-13-(hydroxymethyl)-4,6,16,18-tetramethoxy-11-azahexacyclo[7.7.2.12,5.01,10.03,8.013,17]nonadecane-8,9-diol	0	8	0	inf	2.80902e-17	1.12361e-16
Senecionine	0	8	0	inf	2.80902e-17	1.12361e-16
Barbaloin	0	7	0	inf	3.97828e-15	1.06087e-14
Kaempferol	0	4	318	1.27905	0.414705	0.829409
Quercetin	0	5	499	0.974727	0.601759	0.962815
Linoleic acid	0	3	526	0.491635	0.930407	0.96889
Palmitic acid	0	4	735	0.433942	0.96889	0.96889
Oleic acid	0	3	558	0.454839	0.948179	0.96889
Rosmarinic acid	1	15	15	223.3	2.92063e-24	4.96507e-23
Picroside II	1	10	1	1498	3.5936e-20	3.05456e-19
Chlorogenic acid	1	6	142	4.68347	0.00433368	0.0245575
Caffeic acid	1	6	194	3.34346	0.0183905	0.0781595
3,4-Dihydroxybenzoic acid	1	3	87	3.38715	0.0736368	0.250365
Rutin	1	5	280	1.75714	0.196074	0.476181
Vanillic acid	1	3	136	2.11765	0.193723	0.476181
Nerol	1	4	225	1.71259	0.23984	0.509659
Luteolin	1	3	199	1.40407	0.385963	0.656137
Apigenin	1	3	190	1.47703	0.357898	0.656137
Geranyl acetate	1	3	236	1.16256	0.498218	0.662955
Kaempferol	1	4	318	1.15603	0.481647	0.662955
Benzaldehyde	1	3	239	1.14625	0.506966	0.662955
Camphor	1	3	342	0.759968	0.755462	0.917346
Palmitic acid	1	4	735	0.392096	0.982198	0.982198
Oleic acid	1	3	558	0.413001	0.966062	0.982198
Quercetin	1	3	501	0.475504	0.939375	0.982198
(+)-Fenchone	2	57	21	1.93666	0.00573536	0.378533
Herbacetin	2	7	0	inf	0.0243324	0.80297
2,12-Dimethoxypicrasa-2,12-diene-1,11,16-trione	2	3	0	inf	0.203784	1
(-)-Epicatechin	2	15	44	0.229592	1	1
3,4-Dihydroxybenzoic acid	2	41	49	0.571586	0.996583	1
4-Hydroxybenzoic acid	2	58	51	0.785417	0.90756	1
4-Hydroxycinnamic acid	2	63	96	0.431838	1	1
2-Phenylethanol	2	29	103	0.178955	1	1
6-Methyl-5-hepten-2-one	2	51	89	0.37668	1	1
Acetophenone	2	23	48	0.32321	0.999999	1
Apigenin	2	87	106	0.543889	0.99998	1
Benzaldehyde	2	81	161	0.309788	1	1
Benzyl acetate	2	9	34	0.179458	1	1
Berberine	2	11	39	0.190443	1	1
Bergapten	2	12	64	0.123162	1	1
4-Methoxybenzaldehyde	2	13	47	0.185371	1	1
Caffeic acid	2	70	130	0.341847	1	1
Camphor	2	172	173	0.649739	0.999904	1
Chrysoeriol	2	20	20	0.694234	0.904404	1
Chlorogenic acid	2	45	103	0.281125	1	1
Conessine	2	4	0	inf	0.119846	1
Coumarin	2	31	92	0.217333	1	1
Cynaroside	2	40	36	0.76956	0.892339	1
Cianidanol	2	29	46	0.428156	0.999892	1
Ethyl benzoate	2	10	34	0.199548	1	1
Fenchol	2	38	33	0.798974	0.853526	1
Geranyl acetate	2	114	125	0.603529	0.999911	1
Ferulic acid	2	90	103	0.582524	0.999872	1
Geranyl formate	2	9	37	0.164358	1	1
Hexyl acetate	2	8	39	0.138192	1	1
Hyperoside	2	70	36	1.37859	0.074508	1
Isoorientin	2	30	20	1.04931	0.495489	1
Isoquercitrin	2	52	65	0.541213	0.999552	1
Isorhamnetin	2	36	49	0.499953	0.999393	1
Isovitexin	2	40	27	1.03635	0.496741	1
Kaempferol	2	161	161	0.657604	0.999791	1
Linoleic acid	2	296	233	0.855865	0.945329	1
Luteolin	2	103	99	0.704274	0.992735	1
Menthone	2	42	73	0.382674	1	1
Myristic acid	2	177	190	0.597783	0.999997	1
Naringetol	2	13	37	0.238123	1	1
Neoquassin	2	3	0	inf	0.203784	1
Nerol	2	84	145	0.364956	1	1
Nicotiflorin	2	27	27	0.692601	0.929654	1
Nonan-1-ol	2	11	56	0.130114	1	1
Oleic acid	2	323	238	0.931949	0.777871	1
Orientin	2	27	20	0.94222	0.639228	1
Ouabain	2	3	0	inf	0.203784	1
Palmitic acid	2	402	337	0.762117	0.99883	1
Phenylacetaldehyde	2	32	87	0.238827	1	1
Quercetin	2	270	234	0.757347	0.997278	1
Quercetin-3-glucoside	2	39	34	0.795612	0.859968	1
Quercitrin	2	57	40	0.995609	0.552449	1
Quinovic acid	2	5	0	inf	0.0704605	1
Riboflavin	2	18	63	0.188745	1	1
Rutin	2	135	150	0.587282	0.999989	1
Salicylic acid	2	21	35	0.410023	0.99966	1
Sinapic acid	2	18	27	0.458586	0.996796	1
Stearic acid	2	292	228	0.865637	0.93051	1
Syringic acid	2	40	43	0.639266	0.982656	1
Tannic acid	2	123	70	1.25097	0.0864068	1
Thiamine	2	15	57	0.174643	1	1
Vanillic acid	2	67	72	0.631841	0.996593	1
Vanillin	2	20	49	0.27438	1	1
Vitexin	2	58	39	1.04103	0.468592	1
beta-Carotene	2	57	114	0.320453	1	1
Magnoflorine	3	23	18	inf	3.67114e-44	7.34228e-44
Berberine	3	3	47	7.03085	0.0130142	0.0130142
Palmatine	4	24	1	4880.73	2.01142e-47	2.41371e-46
Berberine	4	27	23	325.027	7.02946e-42	4.21768e-41
Jatrorrhizine	4	21	1	3355.5	9.2325e-41	3.693e-40
Oxyacanthine	4	11	0	inf	2.03919e-21	6.11758e-21
Unii-kki91P85GE	4	6	0	inf	8.53032e-12	2.04728e-11
Magnoflorine	4	10	31	28.4774	1.51111e-10	3.02222e-10
Berberine chloride	4	5	0	inf	6.44892e-10	1.10553e-09
Linoleic acid	4	3	526	0.305133	0.994047	0.994047
Oleic acid	4	5	556	0.504197	0.956421	0.994047
Myristic acid	4	3	364	0.482658	0.938667	0.994047
Palmitic acid	4	7	732	0.514344	0.966843	0.994047
Stearic acid	4	5	515	0.557605	0.929491	0.994047
Hyoscyamine	5	20	3	1493.33	1.02568e-38	1.23082e-37
Brucine	5	9	0	inf	3.25693e-18	1.95416e-17
Strychnine	5	9	1	960.857	3.22974e-17	1.2919e-16
Chlorogenic acid	5	4	144	2.24252	0.126889	0.380668
Vanillic acid	5	3	136	1.72141	0.276712	0.664108
Myristic acid	5	3	364	0.573565	0.885308	0.9851
Luteolin	5	3	199	1.14126	0.506688	0.9851
Linoleic acid	5	6	523	0.82218	0.732489	0.9851
Palmitic acid	5	5	734	0.411172	0.9851	0.9851
Oleic acid	5	4	557	0.465682	0.960302	0.9851
Stearic acid	5	4	516	0.514908	0.937632	0.9851
Quercetin	5	3	501	0.386338	0.976364	0.9851
Gentianine	6	11	1	846.621	1.33994e-19	3.48384e-18
Gentiopicroside	6	10	0	inf	8.52316e-19	1.10801e-17
Sweroside	6	10	2	371.833	5.4905e-17	4.75843e-16
Swertiamarin	6	8	0	inf	4.40589e-15	2.86383e-14
Colchicine	6	7	0	inf	3.02538e-13	1.5732e-12
Emetine	6	6	0	inf	2.01721e-11	8.74126e-11
Amarogentin	6	5	0	inf	1.30716e-09	4.85515e-09
Choline chloride	6	5	1	318.857	7.74207e-09	2.51617e-08
Isoorientin	6	3	47	3.77113	0.0559676	0.161684
4-Hydroxybenzoic acid	6	4	105	2.25185	0.122009	0.288384
Ferulic acid	6	6	187	1.9308	0.11796	0.288384
Caffeic acid	6	6	194	1.85476	0.133808	0.289917
3,4-Dihydroxybenzoic acid	6	3	87	2	0.20917	0.41834
Apigenin	6	4	189	1.20165	0.445286	0.826959
Luteolin	6	4	198	1.14198	0.481577	0.834733
4-Hydroxycinnamic acid	6	3	156	1.07952	0.5386	0.875225
Kaempferol	6	4	318	0.669113	0.83974	0.991425
Camphor	6	3	342	0.448317	0.955562	0.991425
Benzaldehyde	6	3	239	0.676467	0.815949	0.991425
Linoleic acid	6	4	525	0.361481	0.991425	0.991425
Palmitic acid	6	7	732	0.434964	0.989999	0.991425
Quercetin	6	4	500	0.385111	0.987154	0.991425
Myristic acid	6	4	363	0.572391	0.907576	0.991425
Oleic acid	6	7	554	0.642873	0.89792	0.991425
Stearic acid	6	5	515	0.47656	0.968941	0.991425
Rutin	6	4	281	0.771847	0.758291	0.991425
Narcissin	7	20	12	inf	4.40812e-41	7.05299e-40
Isorhamnetin	7	8	77	18.8398	2.40328e-07	1.92262e-06
Nicotiflorin	7	5	49	14.9932	7.41907e-05	0.000395684
Quercetin-3-glucoside	7	4	69	7.91304	0.00321245	0.0128498
Rutin	7	7	278	3.8254	0.00821563	0.02629
Isoquercitrin	7	4	113	4.73451	0.0170183	0.0453822
Vanillic acid	7	4	135	3.92222	0.0301381	0.0683547
Syringic acid	7	3	80	4.79338	0.0341774	0.0683547
4-Hydroxycinnamic acid	7	4	155	3.38387	0.046265	0.0822489
Kaempferol	7	6	316	2.62703	0.0524354	0.0838966
Quercetin	7	7	497	1.90249	0.133415	0.194058
Ferulic acid	7	3	190	1.9161	0.238013	0.317351
Linoleic acid	7	5	524	1.09987	0.513548	0.586912
Stearic acid	7	5	515	1.12492	0.496474	0.586912
Oleic acid	7	5	556	1.01739	0.572795	0.610982
Palmitic acid	7	6	733	0.888716	0.676108	0.676108
Trifolin	8	19	4	817.365	6.62067e-35	2.05241e-33
Resveratrol	8	12	9	148.8	1.59822e-18	2.47724e-17
Kaempferol	8	12	310	3.73742	0.000837097	0.00865
Quercetin	8	13	491	2.43863	0.0140013	0.10851
Syringic acid	8	4	79	3.90958	0.0272779	0.169123
(-)-Epicatechin	8	3	56	4.03633	0.048354	0.214139
Vanillic acid	8	5	134	2.91183	0.0421057	0.214139
4-Hydroxycinnamic acid	8	5	154	2.50962	0.0681493	0.244311
Vanillin	8	3	66	3.40909	0.070929	0.244311
Benzaldehyde	8	6	236	1.96056	0.117148	0.330146
2-Phenylethanol	8	4	128	2.35826	0.111035	0.330146
3,4-Dihydroxybenzoic acid	8	3	87	2.56124	0.1307	0.337641
Chlorogenic acid	8	4	144	2.08036	0.150984	0.36004
Coumarin	8	3	120	1.82845	0.248434	0.427859
Isoquercitrin	8	3	114	1.93013	0.225586	0.427859
4-Hydroxybenzoic acid	8	3	106	2.0836	0.195923	0.427859
Phenylacetaldehyde	8	3	116	1.89507	0.233152	0.427859
Oleic acid	8	10	551	1.39416	0.248204	0.427859
Linoleic acid	8	9	520	1.29507	0.318407	0.470029
Luteolin	8	4	198	1.47403	0.315586	0.470029
6-Methyl-5-hepten-2-one	8	3	137	1.58872	0.314934	0.470029
Apigenin	8	3	190	1.1167	0.519473	0.670986
Palmitic acid	8	11	728	1.08863	0.476769	0.670986
Ferulic acid	8	3	190	1.1167	0.519473	0.670986
Caffeic acid	8	3	197	1.07334	0.54449	0.675168
Rutin	8	4	281	0.996441	0.583529	0.695746
Stearic acid	8	7	513	0.943158	0.622886	0.708863
Nerol	8	3	226	0.922338	0.640263	0.708863
Geranyl acetate	8	3	236	0.878872	0.670078	0.71629
Myristic acid	8	4	363	0.739079	0.784273	0.810416
Camphor	8	3	342	0.57441	0.88518	0.88518
Isopimpinellin	9	36	10	196.83	1.51742e-48	6.67666e-47
Imperatorin	9	34	9	196.804	6.17022e-46	1.35745e-44
Bergapten	9	41	35	72.3608	1.98964e-45	2.91814e-44
Methoxsalen	9	34	13	136	1.4296e-43	1.57256e-42
Xanthotoxol	9	14	0	inf	6.34685e-22	5.58523e-21
Coumarin	9	28	95	12.907	9.50392e-18	6.96954e-17
4-[(3,3-Dimethyloxiran-2-yl)methoxy]furo[3,2-g]chromen-7-one	9	9	6	49.0522	1.38041e-10	8.67684e-10
Genistein	9	12	31	13.1008	5.41326e-09	2.97729e-08
Podofilox	9	5	1	154.648	2.14461e-07	1.04847e-06
Oxypeucedanin hydrate	9	4	5	24.3556	0.000128173	0.00056396
4-Methoxybenzaldehyde	9	8	52	4.85294	0.000676697	0.00270679
Limonin	9	4	17	7.12418	0.00448301	0.0164377
Skimmianine	9	4	19	6.36842	0.0063048	0.0213393
Cynaroside	9	5	71	2.10871	0.107486	0.315293
Vitexin	9	6	91	1.98367	0.102343	0.315293
Geranyl acetate	9	11	228	1.46147	0.16827	0.462742
Fenchol	9	4	67	1.76617	0.211369	0.465012
Orientin	9	3	44	2.0109	0.206117	0.465012
Ferulic acid	9	9	184	1.46958	0.191263	0.465012
Isovitexin	9	4	63	1.88183	0.183575	0.465012
Isoorientin	9	3	47	1.87992	0.232756	0.487679
(+)-Fenchone	9	4	74	1.59384	0.262575	0.525151
Isoquercitrin	9	5	112	1.31099	0.352976	0.621237
Menthone	9	5	110	1.33611	0.339379	0.621237
Rutin	9	11	274	1.1877	0.352706	0.621237
Riboflavin	9	3	78	1.11644	0.514405	0.738456
Vanillic acid	9	5	134	1.08419	0.501392	0.738456
Luteolin	9	7	195	1.04155	0.520275	0.738456
Camphor	9	12	333	1.04955	0.490368	0.738456
Apigenin	9	7	186	1.09685	0.470265	0.738456
beta-Carotene	9	6	165	1.05558	0.514566	0.738456
Chlorogenic acid	9	5	143	1.01152	0.558867	0.768442
4-Hydroxycinnamic acid	9	5	154	0.934242	0.624575	0.832767
Palmitic acid	9	23	716	0.897623	0.705498	0.901184
4-Hydroxybenzoic acid	9	3	106	0.810675	0.716851	0.901184
Myristic acid	9	7	360	0.517673	0.973531	0.973531
Kaempferol	9	6	316	0.510217	0.969213	0.973531
Caffeic acid	9	4	196	0.567177	0.9143	0.973531
Benzaldehyde	9	4	238	0.457283	0.969423	0.973531
Linoleic acid	9	12	517	0.609284	0.961116	0.973531
Oleic acid	9	16	545	0.808318	0.809697	0.973531
Nerol	9	5	224	0.620284	0.895741	0.973531
Stearic acid	9	14	506	0.754622	0.860993	0.973531
Quercetin	9	11	493	0.584927	0.967957	0.973531
Allyl isothiocyanate	10	17	0	inf	2.12711e-30	8.72117e-29
Phenethyl isothiocyanate	10	14	1	889.2	9.21864e-24	1.88982e-22
potassium;[(E)-1-[3,4,5-trihydroxy-6-(hydroxymethyl)oxan-2-yl]sulfanylbut-3-enylideneamino] sulfate	10	13	0	inf	3.91478e-23	5.3502e-22
Aristolochic acid	10	10	2	284.872	5.28398e-16	5.41608e-15
Sinigrin	10	7	0	inf	1.39395e-12	1.14304e-11
2,4,5-Trimethoxybenzaldehyde	10	6	1	310.186	5.06068e-10	3.45813e-09
3-Indolylmethyl glucosinolate	10	5	0	inf	3.78809e-09	2.21874e-08
3-Butenylglucosinolate	10	4	0	inf	1.91004e-07	9.78895e-07
Dimethyl disulfide	10	6	10	30.893	4.99521e-07	2.2756e-06
Neoglucobrassicin	10	3	0	inf	9.42563e-06	3.86451e-05
Sinapic acid	10	6	39	7.81753	0.000315772	0.00117697
beta-Carotene	10	10	161	3.28556	0.00278139	0.00950307
Myristic acid	10	15	352	2.34626	0.00789983	0.0249149
Isorhamnetin	10	6	79	3.78864	0.00880435	0.0257842
Ferulic acid	10	9	184	2.49457	0.019648	0.0537044
Rosmarinic acid	10	3	27	5.30676	0.0254068	0.065105
6-Methyl-5-hepten-2-one	10	7	133	2.6203	0.0281334	0.0678512
Phenylacetaldehyde	10	6	113	2.60671	0.0401015	0.0865348
Oleic acid	10	18	543	1.79754	0.0389805	0.0865348
Furfuryl alcohol	10	3	34	4.20077	0.0437872	0.0897638
4-Hydroxycinnamic acid	10	7	152	2.27193	0.0511068	0.0997799
Nonan-1-ol	10	4	63	3.04903	0.0540903	0.100805
Magnoflorine	10	3	38	3.75172	0.0565991	0.100894
2-Phenylethanol	10	6	126	2.32337	0.061245	0.104627
Stearic acid	10	15	505	1.50175	0.130204	0.213534
Vanillin	10	3	66	2.13241	0.184488	0.290923
Camphor	10	10	335	1.44585	0.198989	0.291377
Acetophenone	10	3	68	2.06777	0.195522	0.291377
Nerol	10	7	222	1.503	0.218221	0.298235
Palmitic acid	10	19	720	1.32296	0.212362	0.298235
Kaempferol	10	9	313	1.37372	0.250422	0.320637
Caffeic acid	10	6	194	1.46008	0.258245	0.320637
Benzaldehyde	10	7	235	1.41064	0.261567	0.320637
Rutin	10	8	277	1.37149	0.265894	0.320637
Tannic acid	10	5	188	1.23066	0.40396	0.465672
4-Hydroxybenzoic acid	10	3	106	1.30312	0.420241	0.465672
Geranyl acetate	10	6	233	1.19233	0.412166	0.465672
Menthone	10	3	112	1.22981	0.455243	0.491183
Linoleic acid	10	11	518	0.953363	0.610813	0.642137
Luteolin	10	4	198	0.90954	0.646305	0.662463
Quercetin	10	9	495	0.785909	0.791546	0.791546
Taxifolin	11	21	10	166.05	2.79634e-30	8.66866e-29
Cyanidin 3-glucoside	11	19	8	175.433	8.31598e-28	1.28898e-26
Morin	11	7	1	370.5	1.09707e-11	1.13364e-10
Saponin B	11	6	2	155.023	1.99136e-09	1.5433e-08
Flavanone	11	6	12	25.7209	1.12062e-06	6.94785e-06
Quercetin	11	21	483	2.70342	0.000861804	0.00445265
Kaempferol	11	15	307	2.75484	0.00218442	0.00967384
Linoleic acid	11	20	509	2.32369	0.00430414	0.0166785
Isorhamnetin	11	5	80	3.04545	0.0340038	0.117124
Apigenin	11	8	185	2.15056	0.050979	0.158035
Orientin	11	3	44	3.23123	0.0787652	0.194267
Palmitic acid	11	21	718	1.57312	0.0814668	0.194267
Stearic acid	11	16	504	1.65464	0.0738901	0.194267
Nicotiflorin	11	3	51	2.77877	0.108678	0.224601
Isoquercitrin	11	5	112	2.14286	0.104217	0.224601
3,4-Dihydroxybenzoic acid	11	4	86	2.20982	0.126337	0.233724
Oleic acid	11	16	545	1.49369	0.128171	0.233724
Quercitrin	11	4	93	2.0368	0.153892	0.258266
beta-Carotene	11	6	165	1.74123	0.158292	0.258266
Thiamine	11	3	69	2.03686	0.201103	0.311709
Ferulic acid	11	6	187	1.51996	0.232468	0.343167
Luteolin	11	6	196	1.44376	0.265763	0.343277
4-Hydroxycinnamic acid	11	5	154	1.52745	0.25557	0.343277
Myristic acid	11	10	357	1.34095	0.258094	0.343277
Vitexin	11	3	94	1.4778	0.348595	0.432258
Tannic acid	11	5	188	1.23066	0.40396	0.481645
Rutin	11	6	279	0.972743	0.591104	0.678675
Caffeic acid	11	3	197	0.671044	0.820227	0.908109
Benzaldehyde	11	3	239	0.541659	0.907775	0.938034
Geranyl acetate	11	3	236	0.549374	0.903067	0.938034
Camphor	11	4	341	0.490844	0.953661	0.953661
Liquiritigenin	12	19	1	953.886	2.64795e-30	1.2975e-28
Genistein	12	23	20	62.9625	1.16147e-26	2.84559e-25
Daidzein	12	17	5	162.978	7.92112e-24	1.29378e-22
Isoliquiritigenin	12	14	2	315.429	3.97718e-21	4.87204e-20
Isoflavone	12	10	0	inf	1.28507e-16	1.25937e-15
Soyasaponin I	12	11	2	233.538	2.24964e-16	1.8372e-15
Coumestrol	12	10	1	416.792	1.38349e-15	9.6844e-15
Sparteine	12	9	0	inf	5.38779e-15	3.30002e-14
Genistin	12	9	2	184	2.83742e-13	1.54482e-12
Daidzin	12	7	1	276.125	7.02723e-11	3.44334e-10
Hydroxylupanine	12	6	0	inf	3.5708e-10	1.59063e-09
Lupinine	12	4	0	inf	5.36986e-07	2.19269e-06
Flavanone	12	6	12	19.2807	5.1044e-06	1.92397e-05
Pyridoxine	12	5	10	18.9655	3.38136e-05	0.000118348
Fisetin	12	3	3	36.7833	0.000382654	0.00125
Kaempferol	12	19	303	2.71775	0.000708652	0.00217025
Linarin	12	3	5	22.05	0.00102952	0.00296744
Prunetin	12	3	7	15.7357	0.00211999	0.00562385
Naringetol	12	6	44	5.18182	0.00218068	0.00562385
Isoquercitrin	12	9	108	3.24383	0.00419518	0.0102782
Vitexin	12	8	89	3.46639	0.0045675	0.0106575
Isovitexin	12	6	61	3.70837	0.00948293	0.0211211
Apigenin	12	11	182	2.35714	0.0149731	0.0318993
Rutin	12	14	271	2.04428	0.0208304	0.0425288
Quercetin	12	21	483	1.78778	0.0259466	0.0508553
Trigonelline	12	3	21	5.2119	0.0271251	0.0511204
4-Hydroxycinnamic acid	12	9	150	2.28889	0.028676	0.0520417
Stearic acid	12	21	499	1.71443	0.0358377	0.062716
Coumarin	12	7	116	2.25647	0.0508022	0.0858381
Caffeic acid	12	9	191	1.76178	0.0964672	0.157563
Luteolin	12	9	193	1.7418	0.101172	0.159917
Chlorogenic acid	12	7	141	1.83422	0.111506	0.170744
Cynaroside	12	4	72	2.01318	0.157152	0.231341
Tannic acid	12	8	185	1.59214	0.160523	0.231341
Riboflavin	12	4	77	1.87805	0.184526	0.258336
Salicylic acid	12	3	53	2.03491	0.20116	0.273801
Palmitic acid	12	23	716	1.19979	0.287623	0.370882
Linoleic acid	12	17	512	1.22563	0.283343	0.370882
2-Phenylethanol	12	5	127	1.41393	0.301616	0.378954
Oleic acid	12	17	544	1.13179	0.380826	0.466512
Menthone	12	4	111	1.28203	0.396159	0.473459
3,4-Dihydroxybenzoic acid	12	3	87	1.22011	0.45901	0.535512
Quercitrin	12	3	94	1.12553	0.509532	0.578865
beta-Carotene	12	5	166	1.06149	0.519797	0.578865
Myristic acid	12	10	357	0.979335	0.578169	0.629562
Phenylacetaldehyde	12	3	116	0.902586	0.650853	0.6933
Ferulic acid	12	4	189	0.724957	0.797083	0.831002
Benzaldehyde	12	5	237	0.717663	0.81795	0.834991
Geranyl acetate	12	3	236	0.41822	0.969378	0.969378
Trigonelline	13	14	10	119.7	3.7723e-20	1.39575e-18
1,4-Dimethoxybenzene	13	11	1	846.621	1.33994e-19	2.47888e-18
Genkwanin	13	11	7	120.621	3.30992e-16	4.08224e-15
Diethyl phthalate	13	4	1	248	4.06707e-07	3.76204e-06
Phenylacetaldehyde	13	11	108	7.46328	3.24961e-06	2.40471e-05
Phenethyl isovalerate	13	3	5	36.1297	0.000266188	0.00164149
Isobutyraldehyde	13	3	9	20.036	0.000995687	0.00526292
4-Methoxybenzaldehyde	13	5	55	5.65714	0.00350471	0.0162093
Isovitexin	13	5	62	5.0023	0.00566177	0.0232762
Palmitic acid	13	20	719	2.1057	0.0154151	0.057036
Myristic acid	13	12	355	2.2672	0.0198152	0.0610969
Quercetin	13	15	489	2.13988	0.01928	0.0610969
Benzaldehyde	13	9	233	2.49204	0.0214667	0.0610976
2-Phenylethanol	13	6	126	2.95098	0.025686	0.0633588
Vitexin	13	5	92	3.32453	0.0256666	0.0633588
4-Hydroxybenzoic acid	13	5	104	2.92445	0.0398802	0.092223
Apigenin	13	7	186	2.33447	0.0478595	0.104165
4-Hydroxycinnamic acid	13	6	153	2.39908	0.0563381	0.115806
Coumarin	13	5	118	2.56053	0.0616411	0.120038
Linoleic acid	13	13	516	1.60214	0.116278	0.204871
Nonan-1-ol	13	3	64	2.74789	0.111718	0.204871
Menthone	13	4	111	2.12412	0.140785	0.22648
Luteolin	13	6	196	1.83403	0.138522	0.22648
Syringic acid	13	3	80	2.18209	0.177503	0.263325
beta-Carotene	13	5	166	1.77883	0.177923	0.263325
Kaempferol	13	8	314	1.52787	0.195969	0.278879
6-Methyl-5-hepten-2-one	13	4	136	1.71324	0.229775	0.314877
Geranyl acetate	13	6	233	1.51477	0.238861	0.315638
Ferulic acid	13	5	188	1.55395	0.248744	0.317364
Oleic acid	13	12	549	1.3146	0.267326	0.325624
Caffeic acid	13	5	195	1.49304	0.27282	0.325624
Hyperoside	13	3	103	1.67673	0.285558	0.330177
Stearic acid	13	11	509	1.28474	0.295886	0.331751
Nerol	13	5	224	1.28125	0.37701	0.408564
Rutin	13	6	279	1.23593	0.386479	0.408564
Camphor	13	7	338	1.18926	0.405638	0.416906
Vanillic acid	13	3	136	1.2502	0.446833	0.446833
Epigallocatechin	14	14	3	653.333	8.95229e-26	3.31235e-24
(+)-Gallocatechin	14	16	14	181.959	8.46409e-25	1.56586e-23
(-)-Epicatechin	14	16	43	58.4718	5.37811e-19	6.633e-18
Cianidanol	14	14	61	31.2992	5.00029e-14	4.62527e-13
Procyanidin B1	14	7	1	682.348	2.6194e-13	1.93835e-12
Procyanidin B3	14	6	3	186.667	2.55051e-10	1.57281e-09
(-)-Epicatechin gallate	14	5	1	448.4	1.68296e-09	8.89562e-09
Epigallocatechin gallate	14	4	3	114.872	8.41124e-07	3.8902e-06
Procyanidin B4	14	3	1	249.111	8.23419e-06	3.38517e-05
Procyanidin C1	14	3	2	124.5	2.04019e-05	7.5487e-05
Isoquercitrin	14	8	109	7.11927	8.7573e-05	0.000294564
Quercetin	14	16	488	4.11007	0.000172549	0.000491102
Afzelin	14	3	6	41.4259	0.000165347	0.000491102
Kaempferol	14	11	311	3.59655	0.00171019	0.00451979
Rutin	14	10	275	3.57818	0.00245757	0.006062
Quercitrin	14	5	92	4.67609	0.00777894	0.0179888
Hyperoside	14	5	101	4.24158	0.0112509	0.0219096
Ferulic acid	14	7	186	3.36583	0.0107523	0.0219096
Tannic acid	14	7	186	3.36583	0.0107523	0.0219096
Vanillic acid	14	5	134	3.14776	0.0328461	0.0607653
Vanillin	14	3	66	3.66498	0.0605821	0.10674
Thiamine	14	3	69	3.50081	0.06717	0.107454
Quercetin-3-glucoside	14	3	70	3.44921	0.0694376	0.107454
beta-Carotene	14	5	166	2.50241	0.0697002	0.107454
Riboflavin	14	3	78	3.08405	0.0888174	0.13145
Caffeic acid	14	5	195	2.10051	0.117579	0.167324
Chlorogenic acid	14	4	144	2.24252	0.126889	0.173885
Palmitic acid	14	13	726	1.59788	0.141108	0.186464
4-Hydroxycinnamic acid	14	4	155	2.07246	0.153474	0.195812
Nerol	14	5	224	1.80268	0.1781	0.219657
Stearic acid	14	9	511	1.45261	0.231224	0.275977
Linoleic acid	14	9	520	1.42005	0.24789	0.286622
Luteolin	14	3	199	1.14126	0.506688	0.568105
Myristic acid	14	5	362	1.03923	0.546106	0.594292
Benzaldehyde	14	3	239	0.93166	0.634527	0.65589
Oleic acid	14	7	554	0.927876	0.638163	0.65589
Camphor	14	3	342	0.617609	0.856315	0.856315
Salicin	15	10	0	inf	6.50197e-22	1.43043e-20
Pinocembrin	15	10	2	937.083	4.25002e-20	4.67502e-19
Prunin	15	5	3	220.392	2.87498e-09	2.10832e-08
Chrysin	15	5	10	65.9118	1.47547e-07	8.1151e-07
Taxifolin	15	4	27	18.3045	0.000174685	0.000768612
Amygdaloside	15	3	13	27.1822	0.000406534	0.00149063
Naringetol	15	4	46	10.6522	0.00113244	0.0035591
Apigenin	15	7	186	5.181	0.00161617	0.00444447
(+)-Gallocatechin	15	3	27	13.0058	0.00269902	0.00659761
Tannic acid	15	6	187	4.13904	0.00814844	0.0162969
Isorhamnetin	15	4	81	5.95336	0.00795855	0.0162969
Salicylic acid	15	3	53	6.54816	0.015654	0.0286989
Cianidanol	15	3	72	4.77851	0.0338586	0.0572992
Kaempferol	15	6	316	2.29628	0.0791873	0.124437
Quercetin	15	8	496	2.02189	0.0925735	0.135775
Caffeic acid	15	4	196	2.32993	0.121648	0.167266
Rutin	15	4	281	1.55793	0.294341	0.380912
Nerol	15	3	226	1.41476	0.384783	0.47029
Stearic acid	15	5	515	0.991433	0.589787	0.682911
Linoleic acid	15	4	525	0.730582	0.789668	0.868635
Oleic acid	15	4	557	0.675843	0.830519	0.870067
Palmitic acid	15	4	735	0.458352	0.959177	0.959177
Caffeine	16	16	7	465.247	1.34483e-28	3.63104e-27
Prunasin	16	10	0	inf	8.48262e-21	7.63436e-20
Theobromine	16	10	0	inf	8.48262e-21	7.63436e-20
Theophylline	16	6	0	inf	1.55565e-12	1.05006e-11
Xanthine	16	3	2	140.25	1.47278e-05	7.95301e-05
Hypoxanthine	16	3	4	70.0625	5.07334e-05	0.0002283
Benzaldehyde	16	10	232	5.10649	0.000254683	0.000982348
1-Penten-3-OL	16	4	30	12.8464	0.000574671	0.00190276
2-Phenylethanol	16	7	125	5.9388	0.000634255	0.00190276
(-)-Epicatechin	16	4	55	6.92806	0.00460083	0.0124222
2-Heptanol	16	3	29	9.55603	0.00589581	0.0144715
Myristic acid	16	9	358	2.63687	0.0211022	0.04748
Chlorogenic acid	16	5	143	3.34234	0.0275071	0.0571302
Phenylacetaldehyde	16	4	115	3.22268	0.0492909	0.0831784
beta-Carotene	16	5	166	2.84775	0.0473061	0.0831784
Vanillin	16	3	66	4.12879	0.0465328	0.0831784
6-Methyl-5-hepten-2-one	16	4	136	2.69821	0.0802748	0.123371
Caffeic acid	16	5	195	2.39044	0.0822475	0.123371
Rutin	16	5	280	1.59578	0.244039	0.346792
Stearic acid	16	8	512	1.42599	0.262756	0.354721
Linoleic acid	16	8	521	1.39408	0.279594	0.359478
Kaempferol	16	5	317	1.38299	0.333498	0.401647
Oleic acid	16	8	553	1.28905	0.342143	0.401647
Palmitic acid	16	10	729	1.22408	0.374802	0.421302
Tannic acid	16	3	190	1.35263	0.405698	0.421302
Quercetin	16	7	497	1.23169	0.390193	0.421302
Nerol	16	3	226	1.11726	0.521596	0.521596
Cinnamyl alcohol	17	20	14	101.751	1.75091e-26	7.70401e-25
Methyl anthranilate	17	14	12	69.6847	9.58018e-18	2.10764e-16
D-Camphor	17	10	4	135.244	1.20338e-14	1.76496e-13
Costunolide	17	8	1	413.209	3.22782e-13	3.55061e-12
Benzyl acetate	17	13	30	24.9965	1.61603e-12	1.37774e-11
Santamarine	17	7	0	inf	1.87874e-12	1.37774e-11
Parthenolide	17	6	0	inf	9.46466e-11	5.94921e-10
Nerol	17	22	207	7.38464	4.93014e-10	2.71157e-09
Camphor	17	26	319	6.20414	1.40892e-09	6.88806e-09
Curcumin	17	5	1	241.413	2.75257e-08	1.21113e-07
Benzaldehyde	17	20	222	5.81226	6.16056e-08	2.46423e-07
Artemorin	17	3	0	inf	1.0654e-05	3.90645e-05
2-Phenylethanol	17	12	120	5.38974	2.01988e-05	6.83652e-05
Menthone	17	10	105	4.91754	0.000163643	0.000514307
(-)-Camphor	17	3	3	46.2292	0.000203109	0.000595786
3-Phenylpropyl acetate	17	3	4	34.6562	0.000349816	0.000961993
Phenylacetaldehyde	17	9	110	4.11429	0.00102907	0.00266347
Geranyl acetate	17	13	226	3.02143	0.00169929	0.00415381
Ethyl benzoate	17	5	39	6.08417	0.00261159	0.00604789
Geranyl formate	17	5	41	5.78208	0.00318655	0.00701042
Acetophenone	17	6	65	4.42462	0.00444493	0.00931319
6-Methyl-5-hepten-2-one	17	8	132	2.94574	0.0112788	0.0225576
Nonan-1-ol	17	5	62	3.78682	0.0157474	0.0301254
Vanillin	17	5	64	3.66508	0.0177183	0.0324835
2-Heptanol	17	3	29	4.72629	0.0334082	0.0587984
Salicylic acid	17	3	53	2.55778	0.128896	0.218132
Cianidanol	17	3	72	1.86632	0.235724	0.384143
Palmitic acid	17	19	720	1.23863	0.277318	0.428789
Isorhamnetin	17	3	82	1.6311	0.297279	0.428789
Myristic acid	17	10	357	1.27417	0.302102	0.428789
Coumarin	17	4	119	1.50402	0.296792	0.428789
Quercitrin	17	3	94	1.41489	0.372372	0.512011
Caffeic acid	17	5	195	1.12988	0.470656	0.627541
Isoquercitrin	17	3	114	1.1557	0.493662	0.638857
Linoleic acid	17	12	517	1.01473	0.537854	0.676159
Rutin	17	6	279	0.928554	0.631763	0.772155
Luteolin	17	4	198	0.869976	0.677893	0.806142
4-Hydroxycinnamic acid	17	3	156	0.827724	0.704791	0.816074
beta-Carotene	17	3	168	0.764137	0.75158	0.839439
Stearic acid	17	10	510	0.818747	0.763127	0.839439
Tannic acid	17	3	190	0.668421	0.822193	0.882353
Kaempferol	17	5	317	0.653203	0.869205	0.910596
Oleic acid	17	9	552	0.648292	0.914602	0.914602
Quercetin	17	8	496	0.647412	0.907436	0.914602
Isoamyl acetate	18	32	7	68.9003	6.20884e-31	5.83631e-29
Benzaldehyde	18	68	174	7.31525	5.69694e-26	2.67756e-24
Riboflavin	18	37	44	12.9149	5.87481e-22	1.84077e-20
2-Phenylethanol	18	46	86	8.6266	2.44967e-21	5.75673e-20
Furfuryl alcohol	18	25	12	29.8231	1.25127e-20	2.35239e-19
Camphor	18	73	272	5.01163	9.51962e-20	1.49141e-18
Acetone	18	21	6	48.9067	1.54365e-19	2.0729e-18
Thiamine	18	32	40	11.8676	1.45987e-18	1.71535e-17
Nerol	18	56	173	5.42971	9.52901e-18	9.95252e-17
2-Octanone	18	20	10	27.7086	1.79181e-16	1.6843e-15
2-Pentanone	18	18	6	41.098	2.27878e-16	1.94732e-15
Retinol	18	22	17	18.109	8.62452e-16	6.75588e-15
2-Heptanol	18	20	12	23.0684	1.17971e-15	8.5302e-15
beta-Carotene	18	43	128	5.18079	5.98983e-14	4.02174e-13
1-Penten-3-OL	18	19	15	17.3917	1.17472e-13	7.3616e-13
gamma-Butyrolactone	18	15	6	33.5897	2.82793e-13	1.66141e-12
Myristic acid	18	65	302	3.65488	4.05612e-13	2.24279e-12
Geranyl propionate	18	17	12	19.2262	8.61273e-13	4.49776e-12
Hexyl acetate	18	21	26	11.1785	1.74919e-12	8.52557e-12
Isopropyl alcohol	18	12	2	79.2453	1.81395e-12	8.52557e-12
Geranyl acetate	18	49	190	4.04176	3.62091e-12	1.62079e-11
Methyl acetate	18	13	5	34.5076	9.81951e-12	4.01319e-11
Pantothenic acid	18	13	5	34.5076	9.81951e-12	4.01319e-11
4-Methoxybenzaldehyde	18	21	39	7.40564	4.70101e-10	1.84123e-09
Ethyl formate	18	9	1	116.722	5.9233e-10	2.1415e-09
6-Methyl-5-hepten-2-one	18	33	107	4.45855	5.81817e-10	2.1415e-09
Neochlorogenic acid	18	13	10	17.2127	9.37268e-10	3.26308e-09
Palmitic acid	18	92	647	2.6189	1.81902e-09	6.10671e-09
Acetophenone	18	22	49	6.18628	2.54154e-09	8.23811e-09
Phenylacetaldehyde	18	29	90	4.56557	3.31303e-09	1.03808e-08
Propyl acetate	18	7	0	inf	1.21554e-08	3.68583e-08
Quinic acid	18	11	8	17.9953	1.42507e-08	4.18615e-08
Menthone	18	27	88	4.29119	2.97598e-08	8.47704e-08
Chlorogenic acid	18	30	118	3.57735	1.69163e-07	4.54324e-07
3,7-Dimethyloctan-1-ol	18	6	0	inf	1.67008e-07	4.54324e-07
Pyridoxine	18	9	6	19.4074	2.12598e-07	5.55116e-07
Ethyl benzoate	18	15	29	6.87334	2.55992e-07	6.50358e-07
2,5-Dihydroxybenzoic acid	18	9	7	16.627	4.54703e-07	1.12479e-06
Geranyl formate	18	15	31	6.4237	4.98151e-07	1.20067e-06
Caffeic acid	18	35	165	3.02117	6.38868e-07	1.50134e-06
Isobutyl acetate	18	8	5	20.584	8.13812e-07	1.86581e-06
Linalyl formate	18	6	1	76.4	1.09612e-06	2.45323e-06
Nonan-1-ol	18	17	50	4.53039	4.38475e-06	9.58527e-06
Vanillin	18	17	52	4.3519	6.78217e-06	1.44892e-05
Isobutyraldehyde	18	7	5	17.9012	6.94447e-06	1.45062e-05
Ethyl phenylacetate	18	6	3	25.4424	1.15658e-05	2.36345e-05
Santonin	18	4	0	inf	3.1002e-05	6.20041e-05
Benzyl acetate	18	12	31	5.042	4.37278e-05	8.56335e-05
Nonyl acetate	18	7	8	11.1723	4.64095e-05	8.90306e-05
Ferulic acid	18	30	163	2.531	5.45791e-05	0.000102609
Dimethyl disulfide	18	7	9	9.92615	7.73117e-05	0.000142496
Salicylic acid	18	13	43	3.9398	0.000169002	0.000305503
3,4-Dihydroxybenzoic acid	18	16	74	2.82895	0.000804512	0.00142687
3-Phenylpropyl acetate	18	4	3	16.7585	0.00090485	0.00157511
Vanillic acid	18	21	118	2.3539	0.00119471	0.00204187
4-Hydroxycinnamic acid	18	23	136	2.24652	0.0012818	0.00215159
Methyl ethyl ketone	18	3	1	37.5179	0.00158258	0.00260987
Syringic acid	18	14	69	2.62734	0.00288601	0.0046013
Phenethyl isobutyrate	18	4	5	10.0455	0.00288805	0.0046013
Cianidanol	18	13	62	2.70723	0.00317427	0.00497302
Linoleic acid	18	55	474	1.62847	0.00359488	0.00553965
Fenchol	18	11	60	2.33979	0.0151513	0.0229714
Stearic acid	18	51	469	1.4798	0.0174763	0.0259515
Procyanidin B2	18	3	5	7.48929	0.0176691	0.0259515
Chrysoeriol	18	7	33	2.67609	0.0269679	0.0389997
(-)-Epicatechin	18	9	50	2.28	0.0296334	0.0422052
Oleic acid	18	53	508	1.40935	0.0308233	0.0432446
Cinnamyl alcohol	18	6	28	2.69351	0.0381126	0.0526851
4-Hydroxybenzoic acid	18	13	96	1.71928	0.0613574	0.0835884
(+)-Fenchone	18	10	68	1.85787	0.0638953	0.0858023
Citronellyl propionate	18	3	10	3.73571	0.0683494	0.0904907
Coumarin	18	14	109	1.63046	0.0734548	0.0958993
Quercetin-3-glucoside	18	9	64	1.7691	0.09313	0.119921
Hyperoside	18	12	94	1.6122	0.0964205	0.12248
Cynaroside	18	9	67	1.6874	0.112912	0.141516
Methyl anthranilate	18	4	22	2.26456	0.126468	0.156421
Orientin	18	6	41	1.82794	0.137143	0.167422
Isoorientin	18	6	44	1.70083	0.169374	0.204117
(+)-Gallocatechin	18	4	26	1.91248	0.184778	0.219863
Rutin	18	25	260	1.21312	0.227706	0.267554
Luteolin	18	18	184	1.22634	0.253751	0.294477
Quercitrin	18	9	88	1.27146	0.304156	0.348666
Naringetol	18	5	45	1.37684	0.322029	0.364707
Quercetin	18	40	464	1.07792	0.37573	0.420459
Isoquercitrin	18	10	107	1.15807	0.384393	0.425094
Sinapic acid	18	4	41	1.20403	0.442414	0.483569
Kaempferol	18	25	297	1.04066	0.465745	0.503219
Tannic acid	18	15	178	1.03933	0.488725	0.522047
Nicotiflorin	18	4	50	0.982994	0.589029	0.62212
Apigenin	18	14	179	0.957976	0.602322	0.629092
Berberine	18	3	47	0.780775	0.739281	0.763653
Vitexin	18	6	91	0.803596	0.751927	0.768273
Isorhamnetin	18	5	80	0.761295	0.780387	0.788779
Bergapten	18	4	72	0.675316	0.837121	0.837121
Hesperidin	19	20	4	346.406	2.47509e-31	1.75732e-29
Skimmianine	19	17	6	179.31	6.63541e-25	2.35557e-23
Limonin	19	16	5	196.978	8.49524e-24	2.01054e-22
Tangeretin	19	10	0	inf	1.59069e-17	2.82348e-16
Nobiletin	19	9	0	inf	8.37517e-16	1.18927e-14
Obacunone	19	9	3	154.744	1.74964e-13	2.0704e-12
Sinensetin	19	8	1	403.636	3.81318e-13	3.86765e-12
Naringin	19	9	8	57.8983	1.77349e-11	1.57023e-10
Diosmin	19	8	4	100.773	1.99043e-11	1.57023e-10
Demethylnobiletin	19	7	2	172.589	7.54628e-11	4.87078e-10
Meranzin	19	7	2	172.589	7.54628e-11	4.87078e-10
Butein	19	6	1	289.565	7.35917e-10	4.35417e-09
Nonan-1-ol	19	13	54	13.3765	9.96295e-10	5.4413e-09
Eriocitrin	19	5	0	inf	5.16292e-09	2.44378e-08
Nomilin	19	5	0	inf	5.16292e-09	2.44378e-08
Bergapten	19	12	64	10.1109	5.72759e-08	2.54162e-07
Hesperetin	19	5	2	118.032	1.04709e-07	4.37315e-07
Oxypeucedanin hydrate	19	5	4	58.9628	6.0675e-07	2.39329e-06
Narirutin	19	4	1	185	1.19963e-06	4.48281e-06
Geranyl propionate	19	7	22	15.5485	2.30321e-06	8.1764e-06
Isopimpinellin	19	8	38	10.445	5.79138e-06	1.86903e-05
Geranyl formate	19	8	38	10.445	5.79138e-06	1.86903e-05
Poncirin	19	3	0	inf	1.13063e-05	3.34477e-05
Cynaropicrin	19	3	0	inf	1.13063e-05	3.34477e-05
4-[(3,3-Dimethyloxiran-2-yl)methoxy]furo[3,2-g]chromen-7-one	19	5	10	23.5213	1.30269e-05	3.55735e-05
Nonyl acetate	19	5	10	23.5213	1.30269e-05	3.55735e-05
Methyl anthranilate	19	6	20	14.3543	1.73423e-05	4.56037e-05
Nerol	19	16	213	4.18988	2.52522e-05	6.40325e-05
Methyl acetate	19	5	13	18.0687	3.5278e-05	8.63703e-05
7-Methoxycoumarin	19	5	14	16.7705	4.7052e-05	0.000104397
Prunetin	19	4	6	30.7639	4.6267e-05	0.000104397
6-Methyl-5-hepten-2-one	19	12	128	4.90547	4.54841e-05	0.000104397
Coumarin	19	11	112	5.05205	6.76462e-05	0.000141261
Hexyl acetate	19	7	40	8.48167	6.76338e-05	0.000141261
Naringetol	19	7	43	7.87907	0.000101894	0.0002067
Geranyl acetate	19	15	224	3.61426	0.000172483	0.000340174
Imperatorin	19	6	37	7.69918	0.000340811	0.000653989
Eriodictyol	19	4	14	13.1369	0.000588411	0.00104443
Prunin	19	3	5	27.1347	0.000583603	0.00104443
Flavanone	19	4	14	13.1369	0.000588411	0.00104443
Cinnamyl alcohol	19	5	29	8.04109	0.000867764	0.00150271
Phenylacetaldehyde	19	9	110	4.0167	0.00119039	0.00201232
Fenchol	19	6	65	4.32642	0.00490243	0.00809472
Menthone	19	7	108	3.04342	0.014232	0.0228493
Caffeine	19	3	20	6.73776	0.0144819	0.0228493
Benzyl acetate	19	4	39	4.66239	0.0155579	0.0240133
Ethyl benzoate	19	4	40	4.54375	0.0168289	0.0254224
Benzaldehyde	19	11	231	2.31127	0.0181409	0.0268334
2-Phenylethanol	19	7	125	2.60836	0.0283888	0.0411348
Rosmarinic acid	19	3	27	4.97506	0.0296789	0.042144
Myristic acid	19	14	353	1.9496	0.0314888	0.0438374
Caffeic acid	19	9	191	2.22452	0.0345512	0.0471756
Oleic acid	19	19	542	1.78357	0.0363973	0.0487586
Linoleic acid	19	18	511	1.77161	0.0406768	0.0534825
Chlorogenic acid	19	7	141	2.29472	0.0486024	0.0625051
Palmitic acid	19	23	716	1.66707	0.0492998	0.0625051
Stearic acid	19	17	503	1.65896	0.0659901	0.0821981
Vanillin	19	4	65	2.7641	0.0706616	0.0864996
Camphor	19	12	333	1.7009	0.0840905	0.101194
Methoxsalen	19	3	44	3.02922	0.0905598	0.107162
Apigenin	19	7	186	1.70191	0.146875	0.170953
Acetophenone	19	3	68	1.93848	0.22009	0.252038
Thiamine	19	3	69	1.90949	0.226179	0.254901
Cynaroside	19	3	73	1.80151	0.250862	0.2783
4-Hydroxycinnamic acid	19	5	154	1.42788	0.297076	0.324499
Isorhamnetin	19	3	82	1.59706	0.307692	0.331002
Rutin	19	8	277	1.27601	0.323968	0.343309
Luteolin	19	5	197	1.09299	0.497347	0.519289
Quercetin	19	10	494	0.832369	0.748184	0.76987
Tannic acid	19	3	190	0.654458	0.832312	0.844202
Kaempferol	19	4	318	0.49869	0.950378	0.950378
Esculin	20	16	2	522.588	3.18116e-26	1.49515e-24
Amygdaloside	20	10	6	92.375	7.50463e-14	1.76359e-12
Phlorizin	20	7	0	inf	1.62087e-12	2.53936e-11
Eriodictyol	20	9	9	54	2.39146e-11	2.80996e-10
7-Methoxycoumarin	20	8	11	38.303	1.93599e-09	1.81983e-08
Naringin	20	5	12	20.4722	2.13251e-05	0.000167047
Morphine	20	3	1	141.83	3.94862e-05	0.000265122
Chlorogenic acid	20	12	136	4.84598	5.23395e-05	0.000300106
Caffeic acid	20	14	186	4.25896	5.74671e-05	0.000300106
2-(4-Hydroxyphenyl)ethanol	20	3	2	70.883	9.71837e-05	0.000456763
Apigenin	20	13	180	3.98784	0.000169309	0.000723411
Rutin	20	15	270	3.1	0.000761758	0.00298355
Quercitrin	20	8	89	4.56715	0.00100187	0.00362215
Quercetin	20	21	483	2.6087	0.00118444	0.00397635
Naringetol	20	5	45	5.37778	0.00422105	0.0132259
Coumarin	20	8	115	3.49151	0.00460519	0.0135277
Syringic acid	20	6	77	3.80047	0.00866584	0.0239585
Luteolin	20	10	192	2.64453	0.0106493	0.026343
Chrysoeriol	20	4	36	5.28261	0.0105714	0.026343
Neochlorogenic acid	20	3	20	7.03085	0.0130142	0.0305833
Quercetin-3-glucoside	20	5	68	3.52124	0.0204696	0.0458129
Rosmarinic acid	20	3	27	5.19149	0.0267907	0.0572347
Taxifolin	20	3	28	5.0038	0.0292101	0.0596902
4-Hydroxycinnamic acid	20	7	152	2.21802	0.0560704	0.109805
beta-Carotene	20	7	164	2.04382	0.0770244	0.144806
Vanillic acid	20	6	133	2.14286	0.0811088	0.14662
Kaempferol	20	11	311	1.73403	0.0856924	0.149168
Isorhamnetin	20	4	81	2.29952	0.114326	0.191904
3,4-Dihydroxybenzoic acid	20	4	86	2.16077	0.133383	0.216173
Fenchol	20	3	68	2.02284	0.203634	0.298217
Hyperoside	20	4	102	1.80818	0.202103	0.298217
Acetophenone	20	3	68	2.02284	0.203634	0.298217
Thiamine	20	3	69	1.9926	0.209386	0.298217
Isoquercitrin	20	4	113	1.6237	0.254565	0.351898
Riboflavin	20	3	78	1.75532	0.262624	0.352667
6-Methyl-5-hepten-2-one	20	4	136	1.3344	0.371143	0.476538
Linoleic acid	20	13	516	1.16232	0.375147	0.476538
Ferulic acid	20	5	188	1.20272	0.421404	0.52121
Oleic acid	20	12	549	0.962899	0.599917	0.722977
Tannic acid	20	4	189	0.935818	0.625559	0.735031
Camphor	20	7	338	0.907871	0.653976	0.74968
Nerol	20	4	225	0.772174	0.758141	0.848396
Benzaldehyde	20	4	238	0.725247	0.796433	0.870519
Stearic acid	20	9	511	0.73543	0.841718	0.899108
Palmitic acid	20	13	726	0.724481	0.87562	0.914537
Geranyl acetate	20	3	236	0.537414	0.910409	0.925353
Myristic acid	20	5	362	0.571209	0.925353	0.925353
Wogonin	21	11	0	inf	6.37227e-23	2.42146e-21
Falcarinol	21	9	1	1122.5	1.05929e-17	2.01265e-16
Baicalein	21	7	1	785.75	1.14393e-13	1.44898e-12
Scutellarein	21	7	3	261.683	1.68949e-12	1.60502e-11
Baicalin	21	5	0	inf	1.60373e-10	1.21883e-09
Andrographolide	21	5	1	510.227	9.54459e-10	6.04491e-09
Falcarindiol	21	5	2	255	3.3136e-09	1.79881e-08
Chrysin	21	6	9	71.0159	7.24651e-09	3.44209e-08
Apigenin	21	12	181	9.12707	5.60985e-07	2.3686e-06
Luteolin	21	10	192	6.29289	5.40833e-05	0.000205517
4-Methoxybenzaldehyde	21	4	56	6.80124	0.00488949	0.016891
Nonan-1-ol	21	4	63	6.02622	0.00725976	0.0229892
Isorhamnetin	21	4	81	4.64842	0.0165653	0.0464695
Methoxsalen	21	3	44	6.25568	0.0171203	0.0464695
Myristic acid	21	9	358	2.63687	0.0211022	0.053459
Caffeic acid	21	6	194	3.02209	0.0265201	0.0614865
Chlorogenic acid	21	5	143	3.34234	0.0275071	0.0614865
beta-Carotene	21	5	166	2.84775	0.0473061	0.0898817
Vanillin	21	3	66	4.12879	0.0465328	0.0898817
Menthone	21	4	111	3.34508	0.0443283	0.0898817
Bergapten	21	3	73	3.72089	0.0591061	0.106954
Stearic acid	21	10	510	2.00231	0.0679079	0.117295
Ferulic acid	21	5	188	2.48791	0.0727766	0.12024
4-Hydroxycinnamic acid	21	4	155	2.34614	0.115153	0.182326
Nerol	21	5	224	2.05154	0.128316	0.19177
Palmitic acid	21	12	727	1.67153	0.131211	0.19177
4-Hydroxybenzoic acid	21	3	106	2.52358	0.136553	0.192186
Geranyl acetate	21	5	234	1.95416	0.146616	0.198979
Linoleic acid	21	9	520	1.65962	0.154653	0.202648
Phenylacetaldehyde	21	3	116	2.29526	0.164883	0.208852
Coumarin	21	3	120	2.21458	0.176704	0.216605
Oleic acid	21	9	552	1.53442	0.201385	0.239145
Camphor	21	6	339	1.60725	0.216579	0.249394
Quercetin	21	8	496	1.48557	0.233825	0.253867
6-Methyl-5-hepten-2-one	21	3	137	1.92427	0.22944	0.253867
Benzaldehyde	21	4	238	1.4673	0.322503	0.340419
Rutin	21	4	281	1.21615	0.444354	0.456364
Kaempferol	21	4	318	1.05442	0.545384	0.545384

## Sheet: Supp_Table_9
APPID	Genotype_Taste	rs713598	rs1726866	rs10246939	Prakriti	bitterness_score	SEX	BMI	AGE
AYT250600812	Dominant Supertaster	GG	GG	CC	KP	0	Male	34.53	29
AYT250600816	Dominant Supertaster	GG	GG	CC	KP	0	Male	19.82	28
AYT231100013	Non Taster	CC	AA	TT	PV	0	Male	21.14	28
AYT231100042	Non Taster	CC	AA	TT	KP	0	Female	22.95	27
AYT231100056	Non Taster	CC	AA	TT	PV	0	Male	23.03	23
AYT231200111	Non Taster	CC	AA	TT	VK	0	Male	21.8	45
AYT240100357	Non Taster	CC	AA	TT	PV	0	Male	23.28	35
AYT240100414	Non Taster	CC	AA	TT	KP	0	Female	21.89	23
AYT240100432	Non Taster	CC	AA	TT	KP	0	Female	32.46	29
AYT240300469	Non Taster	CC	AA	TT	KP	0	Female	27.15	32
AYT240300474	Non Taster	CC	AA	TT	VK	0	Female	24.1	33
AYT240300483	Non Taster	CC	AA	TT	VK	0	Male	27.77	27
AYT240300486	Non Taster	CC	AA	TT	KP	0	Male	31.63	27
AYT240400496	Non Taster	CC	AA	TT	VK	0	Male	27.75	21
AYT241100668	Non Taster	CC	AA	TT	VK	0	Female	19.4	28
AYT241100671	Non Taster	CC	AA	TT	VK	0	Female	27.34	24
AYT241100674	Non Taster	CC	AA	TT	PV	0	Male	29.35	30
AYT241100685	Non Taster	CC	AA	TT	KP	0	Male	27.38	31
AYT241100696	Non Taster	CC	AA	TT	KP	0	Male	24.63	46
AYT241200702	Non Taster	CC	AA	TT	VK	0	Male	25.18	24
AYT241200707	Non Taster	CC	AA	TT	KP	0	Male	24.21	27
AYT241200724	Non Taster	CC	AA	TT	VK	0	Male	24.19	26
AYT250100761	Non Taster	CC	AA	TT	KP	0	Female	35.95	27
AYT250100763	Non Taster	CC	AA	TT	PV	0	Male	26.23	25
AYT250100766	Non Taster	CC	AA	TT	VK	0	Female	24.41	24
AYT250100778	Non Taster	CC	AA	TT	KP	0	Male	23.55	23
AYT250500791	Non Taster	CC	AA	TT	KP	0	Female	35.84	24
AYT250600794	Non Taster	CC	AA	TT	KP	0	Male	26.3	29
AYT250600798	Non Taster	CC	AA	TT	VK	0	Male	25	28
AYT250600799	Non Taster	CC	AA	TT	KP	0	Female	22.86	25
AYT250600802	Non Taster	CC	AA	TT	VK	0	Male	24.91	22
AYT250600805	Non Taster	CC	AA	TT	PV	0	Female	26.62	27
AYT250600807	Non Taster	CC	AA	TT	KP	0	Male	21.52	29
AYT250600809	Non Taster	CC	AA	TT	KP	0	Male	27.59	28
AYT250600817	Non Taster	CC	AA	TT	KP	0	Male	25.65	28
AYT250600819	Non Taster	CC	AA	TT	KP	0	Female	29.37	24
AYT250600823	Non Taster	CC	AA	TT	KP	0	Male	24.91	37
AYT250600827	Non Taster	CC	AA	TT	KP	0	Male	23.35	29
AYT250600839	Non Taster	CC	AA	TT	KP	0	Male	21.65	23
AYT250600845	Non Taster	CC	AA	TT	KP	0	Male	25.53	31
AYT250600849	Non Taster	CC	AA	TT	VK	0	Male	22.61	27
AYT250600853	Non Taster	CC	AA	TT	VK	0	Female	19.58	29
AYT250600856	Non Taster	CC	AA	TT	PV	0	Female	24.99	22
AYT250600860	Non Taster	CC	AA	TT	KP	0	Male	26.12	35
AYT250600863	Non Taster	CC	AA	TT	VK	0	Male	25.45	55
AYT250700873	Non Taster	CC	AA	TT	PV	0	Male	29.48	24
AYT250700881	Non Taster	CC	AA	TT	PV	0	Male	19	21
AYT250700883	Non Taster	CC	AA	TT	VK	0	Male	20.32	21
AYT250700886	Non Taster	CC	AA	TT	PV	0	Male	25.4	30
AYT250700889	Non Taster	CC	AA	TT	VK	0	Male	24.17	46
AYT250700891	Non Taster	CC	AA	TT	KP	0	Male	22.85	23
AYT250700895	Rare	GG	AA	TC	PV	0	Male	27.56	41
AYT231100002	Rare	GG	AA	TC	PV	0	Female	18.99	28
AYT231100029	Rare	CC	AG	TC	KP	0	Female	19.73	28
AYT240100358	Rare	CC	AG	TC	KP	0	Male	24.24	33
AYT241100675	Rare	GG	AA	TT	KP	0	Male	24.59	24
AYT241200725	Rare	CC	AG	TC	VK	0	Female	21.67	30
AYT250100767	Rare	CC	AG	TC	KP	0	Female	26.85	25
AYT250600846	Rare	CC	AG	TC	KP	0	Male	29	54
AYT250600854	Rare	CC	AG	TC	KP	0	Male	22.74	41
AYT250700888	Recessive Supertaster	GC	AG	TC	VK	0	Female	18.91	30
AYT240300481	Recessive Supertaster	GC	AG	TC	VK	0	Female	23.14	31
AYT241100667	Recessive Supertaster	GC	AG	TC	VK	0	Female	24.06	28
AYT241100688	Recessive Supertaster	GC	AG	TC	KP	0	Male	29.07	43
AYT241100692	Recessive Supertaster	GC	AG	TC	PV	0	Male	25.68	27
AYT250600795	Recessive Supertaster	GC	AG	TC	VK	0	Male	20.31	25
AYT250600815	Recessive Supertaster	GC	AG	TC	KP	0	Male	26.37	29
AYT250600821	Recessive Supertaster	GC	AG	TC	VK	0	Female	29.45	27
AYT250600850	Recessive Supertaster	GC	AG	TC	KP	0	Male	28.23	39
AYT250600858	Recessive Supertaster	GC	AG	TC	PV	0	Male	19.55	40
AYT250700871	Recessive Supertaster	GC	AG	TC	KP	0	Male	24.58	24
AYT250700878	Recessive Supertaster	GC	AG	TC	KP	0	Male	19.47	67
AYT250700900	NA	NA	NA	NA	NA	0	Male	23.75	52
AYT231100011	NA	NA	NA	NA	NA	0	Male	28.41	23
AYT240300479	NA	NA	NA	NA	NA	0	Female	21.77	27
AYT240300485	Non Taster	CC	AA	TT	KP	0	Male	27.57	29
AYT240300467	Dominant Supertaster	GG	GG	CC	VK	1	Male	22.84	27
AYT240300480	Dominant Supertaster	GG	GG	CC	KP	1	Male	32.39	31
AYT250600793	Non Taster	CC	AA	TT	VK	1	Male	24.62	32
AYT231100024	Non Taster	CC	AA	TT	VK	1	Female	22.41	25
AYT231100030	Non Taster	CC	AA	TT	VK	1	Female	21.85	25
AYT231100062	Non Taster	CC	AA	TT	VK	1	Female	17.84	25
AYT231100063	Non Taster	CC	AA	TT	KP	1	Female	25.42	26
AYT231100092	Non Taster	CC	AA	TT	VK	1	Male	27.34	28
AYT240700516	Non Taster	CC	AA	TT	KP	1	Female	22.99	30
AYT241100665	Non Taster	CC	AA	TT	KP	1	Female	24.27	33
AYT250600801	Non Taster	CC	AA	TT	PV	1	Female	18.71	25
AYT250700892	Recessive Supertaster	GC	AG	TC	PV	1	Male	20.18	23
AYT240300463	Recessive Supertaster	GC	AG	TC	KP	1	Male	20.41	28
AYT240300488	Recessive Supertaster	GC	AG	TC	KP	1	Male	29.14	36
AYT240300489	Recessive Supertaster	GC	AG	TC	KP	1	Male	31.53	37
AYT241100664	Recessive Supertaster	GC	AG	TC	VK	1	Female	22.64	29
AYT241100676	Recessive Supertaster	GC	AG	TC	PV	1	Female	28.15	29
AYT250600800	Recessive Supertaster	GC	AG	TC	VK	1	Male	21.6	26
AYT250600806	Recessive Supertaster	GC	AG	TC	KP	1	Male	26.22	25
AYT250600831	Recessive Supertaster	GC	AG	TC	KP	1	Female	22.15	28
AYT250600859	Recessive Supertaster	GC	AG	TC	KP	1	Male	25.41	28
AYT250700882	Recessive Supertaster	GC	AG	TC	KP	1	Male	21.21	21
AYT231100023	NA	NA	NA	NA	NA	1	Male	32.18	27
AYT240300487	NA	NA	NA	NA	NA	1	Male	22.52	31
AYT250600829	Dominant Supertaster	GG	GG	CC	VK	2	Male	20.65	26
AYT231100004	Dominant Supertaster	GG	GG	CC	PV	2	Male	17.99	22
AYT231100019	Dominant Supertaster	GG	GG	CC	VK	2	Male	21.63	25
AYT250600818	Non Taster	CC	AA	TT	PV	2	Female	18.27	28
AYT231100012	Non Taster	CC	AA	TT	KP	2	Male	20.81	26
AYT250600804	Non Taster	CC	AA	TT	KP	2	Male	18.59	22
AYT250700880	Rare	GC	GG	CC	VK	2	Male	22.38	20
AYT250600830	Recessive Supertaster	GC	AG	TC	PV	2	Female	22.23	26
AYT231100009	Recessive Supertaster	GC	AG	TC	KP	2	Male	20.02	42
AYT231100047	Recessive Supertaster	GC	AG	TC	VK	2	Female	21.19	26
AYT231100085	Recessive Supertaster	GC	AG	TC	KP	2	Male	20.2	26
AYT231100089	Recessive Supertaster	GC	AG	TC	PV	2	Female	26.27	27
AYT240100351	Recessive Supertaster	GC	AG	TC	VK	2	Male	23.67	31
AYT240300470	Recessive Supertaster	GC	AG	TC	KP	2	Male	23.9	38
AYT240500509	Recessive Supertaster	GC	AG	TC	VK	2	Male	19.69	36
AYT240500515	Recessive Supertaster	GC	AG	TC	KP	2	Female	26.82	28
AYT241200708	Recessive Supertaster	GC	AG	TC	VK	2	Male	25.43	30
AYT241200721	Recessive Supertaster	GC	AG	TC	PV	2	Female	20.31	33
AYT250600810	Recessive Supertaster	GC	AG	TC	KP	2	Male	16.41	24
AYT250600832	Recessive Supertaster	GC	AG	TC	PV	2	Male	21.86	47
AYT250600864	Recessive Supertaster	GC	AG	TC	KP	2	Male	17.31	54
AYT250600865	Recessive Supertaster	GC	AG	TC	KP	2	Male	28.77	48
AYT250700890	Recessive Supertaster	GC	AG	TC	KP	2	Male	25.42	57
AYT250700894	Dominant Supertaster	GG	GG	CC	KP	3	Male	23.55	23
AYT231100041	Dominant Supertaster	GG	GG	CC	VK	3	Male	18.41	32
AYT240300484	Dominant Supertaster	GG	GG	CC	PV	3	Male	29.48	30
AYT250500790	Dominant Supertaster	GG	GG	CC	KP	3	Female	19.63	23
AYT250600824	Dominant Supertaster	GG	GG	CC	KP	3	Male	33.13	28
AYT250600836	Dominant Supertaster	GG	GG	CC	VK	3	Male	23.05	36
AYT250600861	Non Taster	CC	AA	TT	PV	3	Male	22.42	35
AYT250600844	Rare	GC	GG	CC	KP	3	Male	21.63	31
AYT250600862	Recessive Supertaster	GC	AG	TC	PV	3	Male	28.94	40
AYT231100037	Recessive Supertaster	GC	AG	TC	KP	3	Male	17.51	21
AYT231100053	Recessive Supertaster	GC	AG	TC	KP	3	Male	24.44	28
AYT231100073	Recessive Supertaster	GC	AG	TC	PV	3	Female	20.26	31
AYT231100074	Recessive Supertaster	GC	AG	TC	KP	3	Female	24	27
AYT231200110	Recessive Supertaster	GC	AG	TC	VK	3	Male	25.66	40
AYT240300460	Recessive Supertaster	GC	AG	TC	VK	3	Male	30.08	27
AYT240300468	Recessive Supertaster	GC	AG	TC	VK	3	Male	29.52	28
AYT240300475	Recessive Supertaster	GC	AG	TC	VK	3	Male	23.88	31
AYT241100693	Recessive Supertaster	GC	AG	TC	KP	3	Male	28.23	30
AYT250600813	Recessive Supertaster	GC	AG	TC	KP	3	Male	25.6	29
AYT250600834	Recessive Supertaster	GC	AG	TC	KP	3	Male	24.99	45
AYT250600841	Recessive Supertaster	GC	AG	TC	KP	3	Male	25.05	30
AYT250600842	Recessive Supertaster	GC	AG	TC	VK	3	Male	20.01	25
AYT250600847	Recessive Supertaster	GC	AG	TC	KP	3	Female	24.09	35
AYT250600852	Dominant Supertaster	GG	GG	CC	VK	4	Male	30.96	37
AYT231100046	Dominant Supertaster	GG	GG	CC	VK	4	Female	25.71	31
AYT241200704	Dominant Supertaster	GG	GG	CC	KP	4	Male	26.86	26
AYT250600796	Dominant Supertaster	GG	GG	CC	KP	4	Female	25.18	23
AYT250700885	Recessive Supertaster	GC	AG	TC	VK	4	Male	27.26	31
AYT231100003	Recessive Supertaster	GC	AG	TC	KP	4	Female	27.47	33
AYT231100020	Recessive Supertaster	GC	AG	TC	KP	4	Male	29.45	24
AYT231100051	Recessive Supertaster	GC	AG	TC	KP	4	Male	24.24	23
AYT231100066	Recessive Supertaster	GC	AG	TC	KP	4	Female	23.92	25
AYT231100069	Recessive Supertaster	GC	AG	TC	KP	4	Female	20.53	23
AYT231100088	Recessive Supertaster	GC	AG	TC	PV	4	Female	27.55	27
AYT231100097	Recessive Supertaster	GC	AG	TC	KP	4	Female	19.14	28
AYT231200103	Recessive Supertaster	GC	AG	TC	VK	4	Female	27.41	26
AYT231200117	Recessive Supertaster	GC	AG	TC	KP	4	Male	17.24	27
AYT241100681	Recessive Supertaster	GC	AG	TC	KP	4	Female	21.05	29
AYT241200722	Recessive Supertaster	GC	AG	TC	KP	4	Male	26.91	33
AYT250600828	Recessive Supertaster	GC	AG	TC	VK	4	Female	26.06	29
AYT250700904	NA	NA	NA	NA	VK	4	Female	23.14	23
AYT240300464	Dominant Supertaster	GG	GG	CC	PV	5	Male	21.63	28
AYT231100033	Rare	GC	GG	CC	PV	5	Female	23.28	25
AYT231100007	Recessive Supertaster	GC	AG	TC	KP	5	Female	22.99	31
AYT231100035	Recessive Supertaster	GC	AG	TC	VK	5	Male	19.93	20
AYT231100058	Recessive Supertaster	GC	AG	TC	PV	5	Female	18.83	25
AYT231100087	Recessive Supertaster	GC	AG	TC	VK	5	Female	18.75	27
AYT250600803	Recessive Supertaster	GC	AG	TC	KP	5	Female	22.43	20
AYT250600820	Recessive Supertaster	GC	AG	TC	KP	5	Female	20.54	23
AYT250600825	Recessive Supertaster	GC	AG	TC	KP	5	Female	23.92	28
AYT250600833	Dominant Supertaster	GG	GG	CC	PV	NA	Male	27.67	45
AYT231100071	Dominant Supertaster	GG	GG	CC	KP	NA	Male	20.99	21
AYT250600811	Non Taster	CC	AA	TT	KP	NA	Male	24.65	27
AYT231100039	Non Taster	CC	AA	TT	KP	NA	Male	20.99	21
AYT231100040	Non Taster	CC	AA	TT	KP	NA	Male	24.06	28
AYT231100052	Non Taster	CC	AA	TT	KP	NA	Male	24.01	29
AYT231100081	Non Taster	CC	AA	TT	KP	NA	Female	25.63	28
AYT231100084	Non Taster	CC	AA	TT	VK	NA	Female	21.76	24
AYT240100349	Non Taster	CC	AA	TT	KP	NA	Male	31.14	27
AYT241100672	Non Taster	CC	AA	TT	KP	NA	Female	23.05	43
AYT241200706	Non Taster	CC	AA	TT	KP	NA	Female	25.11	32
AYT250100728	Rare	CC	AG	TC	KP	NA	Female	21.08	26
AYT231100086	Rare	GC	GG	CC	PV	NA	Female	26.72	28
AYT241100670	Recessive Supertaster	GC	AG	TC	VK	NA	Female	23.73	35
AYT231100044	Recessive Supertaster	GC	AG	TC	VK	NA	Female	23.05	26
AYT231100050	Recessive Supertaster	GC	AG	TC	PV	NA	Female	31.89	31
AYT231100061	Recessive Supertaster	GC	AG	TC	KP	NA	Female	19.72	29
AYT231100077	Recessive Supertaster	GC	AG	TC	VK	NA	Male	22.53	27
AYT231100079	Recessive Supertaster	GC	AG	TC	PV	NA	Female	23.23	28
AYT231100082	Recessive Supertaster	GC	AG	TC	VK	NA	Female	26.04	26
AYT240100434	Recessive Supertaster	GC	AG	TC	KP	NA	Female	20.57	27
AYT241100683	Recessive Supertaster	GC	AG	TC	VK	NA	Male	27.66	44
AYT241100698	Recessive Supertaster	GC	AG	TC	KP	NA	Male	23.55	33
AYT241100699	Recessive Supertaster	GC	AG	TC	VK	NA	Male	29.4	32
AYT250600808	Recessive Supertaster	GC	AG	TC	KP	NA	Female	25.59	38
AYT250700884	Recessive Supertaster	GC	AG	TC	KP	NA	Male	18.67	19
AYT250700896	Recessive Supertaster	GC	AG	TC	V	NA	Male	26.61	30
AYT231100036	Recessive Supertaster	GC	AG	TC	V	NA	Female	21.11	25
AYT240100413	Recessive Supertaster	GC	AG	TC	V	NA	Female	17.5	23
AYT250700872	Non Taster	CC	AA	TT	K	NA	Female	15.39	23
AYT250600822	Recessive Supertaster	GC	AG	TC	K	NA	Female	25.44	29
AYT231100031	Recessive Supertaster	GC	AG	TC	K	NA	Female	27.79	29
AYT240100359	Recessive Supertaster	GC	AG	TC	P	NA	Male	27.17	28
AYT241200719	Recessive Supertaster	GC	AG	TC	K	NA	Female	20.7	24
AYT231100054	Non Taster	CC	AA	TT	K	0	Male	30.42	20
AYT231100043	Non Taster	CC	AA	TT	P	0	Male	27.02	28
AYT231200106	Non Taster	CC	AA	TT	KP	0	Male	20.94	26
AYT231200105	Non Taster	CC	AA	TT	KP	0	Female	21.34	26
AYT231200123	Non Taster	CC	AA	TT	P	0	Male	21.72	27
AYT231200161	Non Taster	CC	AA	TT	VK	0	Female	22.48	26
AYT231200163	Non Taster	CC	AA	TT	V	0	Female	16.99	26
AYT231200176	Non Taster	CC	AA	TT	V	0	Female	20.43	29
AYT231200178	Non Taster	CC	AA	TT	KP	0	Female	16.17	29
AYT231200186	Non Taster	CC	AA	TT	KP	0	Female	23.36	27
AYT231200200	Non Taster	CC	AA	TT	PV	0	Female	23.07	28
AYT231200209	Non Taster	CC	AA	TT	KP	0	Female	20.31	26
AYT231200266	Non Taster	CC	AA	TT	KP	0	Male	26.22	20
AYT240100404	Non Taster	CC	AA	TT	VK	0	Male	24.42	22
AYT240800537	Non Taster	CC	AA	TT	KP	0	Female	25.59	25
AYT240800547	Non Taster	CC	AA	TT	VK	0	Male	26.59	30
AYT240800548	Non Taster	CC	AA	TT	KP	0	Female	24.5	22
AYT240800550	Non Taster	CC	AA	TT	VK	0	Male	26.46	25
AYT240800552	Non Taster	CC	AA	TT	VK	0	Male	22.41	24
AYT240800560	Non Taster	CC	AA	TT	VPK	0	Female	24.4	22
AYT240800565	Non Taster	CC	AA	TT	KP	0	Female	18.78	22
AYT240800566	Non Taster	CC	AA	TT	VK	0	Female	22.48	22
AYT240800573	Non Taster	CC	AA	TT	KP	0	Male	14.42	21
AYT240800576	Non Taster	CC	AA	TT	KP	0	Female	16.45	21
AYT240800580	Non Taster	CC	AA	TT	KP	0	Female	28.74	22
AYT240800581	Non Taster	CC	AA	TT	VK	0	Female	26.98	21
AYT240800586	Non Taster	CC	AA	TT	V	0	Female	17.5	24
AYT240800593	Non Taster	CC	AA	TT	VK	0	Female	17.53	25
AYT240800597	Non Taster	CC	AA	TT	VK	0	Female	22.31	23
AYT240800610	Non Taster	CC	AA	TT	KP	0	Female	20.06	23
AYT240900615	Non Taster	CC	AA	TT	VK	0	Female	25.3	22
AYT240900617	Non Taster	CC	AA	TT	KP	0	Female	18.27	22
AYT240900631	Rare	CC	AG	TC	KP	0	Female	17.59	23
AYT231200129	Non Taster	CC	AA	TT	KP	1	Female	25.02	27
AYT231200166	Non Taster	CC	AA	TT	VK	1	Female	16.55	26
AYT231200179	Non Taster	CC	AA	TT	KP	1	Female	27.87	27
AYT240900621	Rare	CC	AG	TC	PV	1	Female	19.65	22
AYT240800530	NA	CC	NA	TT	KP	1	Female	21.95	23
AYT240800607	Non Taster	CC	AA	TT	KP	2	Female	22.72	24
AYT231200170	Non Taster	CC	AA	TT	PV	2	Female	20.86	30
AYT240800608	Rare	CC	AG	TC	V	2	Male	27.87	23
AYT240800571	Non Taster	CC	AA	TT	VK	3	Female	24.92	23
AYT240800564	Non Taster	CC	AA	TT	VK	3	Male	24.58	23
AYT240800606	Rare	CC	AG	TT	PV	4	Female	17.16	23
AYT231200128	Non Taster	CC	AA	TT	KP	NA	Female	18.22	25
AYT231100078	Non Taster	CC	AA	TT	PV	NA	Female	22.07	27
AYT231200183	Non Taster	CC	AA	TT	VK	NA	Female	23.18	24
AYT231200222	Non Taster	CC	AA	TT	KP	NA	Female	21.79	28
AYT231200293	Non Taster	CC	AA	TT	KP	NA	Male	23.51	24
AYT240100380	Rare	CC	AG	TC	KP	NA	Male	30.47	27
AYT240100390	Dominant Supertaster	GG	GG	CC	VK	0	Male	27.56	23
AYT240100382	Dominant Supertaster	GG	GG	CC	VK	3	Female	29.07	29
AYT231200147	Dominant Supertaster	GG	GG	CC	KP	3	Female	20.07	28
AYT231200241	Dominant Supertaster	GG	GG	CC	KP	3	Female	24.1	30
AYT240800535	Dominant Supertaster	GG	GG	CC	KP	3	Female	24.87	24
AYT240900613	Dominant Supertaster	GG	GG	CC	KP	4	Female	20.42	22
AYT240800589	Dominant Supertaster	GG	GG	CC	PV	5	Female	22.36	22
AYT231200175	Dominant Supertaster	GG	GG	CC	KP	5	Female	19.31	26
AYT231200272	Dominant Supertaster	GG	GG	CC	PV	5	Male	20.82	22
AYT240100403	Dominant Supertaster	GG	GG	CC	KP	5	Female	18.4	21
AYT240800549	Dominant Supertaster	GG	GG	CC	VK	NA	Female	20.35	23
AYT231200159	Dominant Supertaster	GG	GG	CC	VK	NA	Female	25.48	27
AYT231200223	Rare	GC	GG	CC	VK	0	Female	18.59	27
AYT231200299	Recessive Supertaster	GC	AG	TC	P	0	Male	29.39	36
AYT231100027	Recessive Supertaster	GC	AG	TC	KP	0	Male	23.08	26
AYT231200139	Recessive Supertaster	GC	AG	TC	VK	0	Male	21.97	26
AYT231200193	Recessive Supertaster	GC	AG	TC	KP	0	Female	26.37	29
AYT231200227	Recessive Supertaster	GC	AG	TC	K	0	Male	25.99	18
AYT240100350	Recessive Supertaster	GC	AG	TC	KP	0	Male	26.67	28
AYT240100381	Recessive Supertaster	GC	AG	TC	VK	0	Male	24.17	30
AYT240100383	Recessive Supertaster	GC	AG	TC	KP	0	Male	19.72	32
AYT240800523	Recessive Supertaster	GC	AG	TC	VK	0	Male	24.36	22
AYT240900611	Rare	GC	AA	TT	KP	1	Female	21.5	22
AYT240800604	Recessive Supertaster	GC	AG	TC	KP	1	Male	22.89	23
AYT231200132	Recessive Supertaster	GC	AG	TC	KP	1	Female	30.33	28
AYT231200169	Recessive Supertaster	GC	AG	TC	VK	1	Female	23.33	25
AYT231200210	Recessive Supertaster	GC	AG	TC	KP	1	Male	22.58	29
AYT231200229	Recessive Supertaster	GC	AG	TC	KP	1	Male	23.8	21
AYT231200234	Recessive Supertaster	GC	AG	TC	PV	2	Male	24.97	23
AYT231100026	Recessive Supertaster	GC	AG	TC	VK	2	Female	16.49	25
AYT231200154	Recessive Supertaster	GC	AG	TC	KP	2	Male	22.59	26
AYT231200213	Recessive Supertaster	GC	AG	TC	KP	2	Female	20.17	27
AYT231200224	Recessive Supertaster	GC	AG	TC	KP	2	Male	20.68	21
AYT240100352	Recessive Supertaster	GC	AG	TC	KP	2	Male	24.72	31
AYT240800533	Recessive Supertaster	GC	AG	TC	KP	2	Female	20.84	21
AYT240800558	Recessive Supertaster	GC	AG	TC	VK	2	Female	21.7	23
AYT240800579	Recessive Supertaster	GC	AG	TC	KP	2	Female	23.16	22
AYT240900619	Rare	GC	GG	CC	PV	3	Female	20.83	22
AYT240800577	Recessive Supertaster	GC	AG	TC	KP	3	Female	26.31	24
AYT231200131	Recessive Supertaster	GC	AG	TC	KP	3	Female	22.52	26
AYT231200133	Recessive Supertaster	GC	AG	TC	KP	3	Female	27.18	28
AYT231200230	Recessive Supertaster	GC	AG	TC	KP	3	Male	28.95	21
AYT240100355	Recessive Supertaster	GC	AG	TC	V	3	Male	27.23	21
AYT240100378	Recessive Supertaster	GC	AG	TC	VK	3	Female	20.98	27
AYT240100405	Recessive Supertaster	GC	AG	TC	KP	3	Female	21.97	22
AYT240800524	Recessive Supertaster	GC	AG	TC	KP	3	Male	27.73	22
AYT240900614	Recessive Supertaster	GC	AG	TC	VK	4	Female	20.26	22
AYT231200142	Recessive Supertaster	GC	AG	TC	KP	4	Female	22.55	28
AYT231200149	Recessive Supertaster	GC	AG	TC	VK	4	Female	19.31	25
AYT231200182	Recessive Supertaster	GC	AG	TC	VK	4	Male	23.03	36
AYT231200185	Recessive Supertaster	GC	AG	TC	KP	4	Female	21.15	28
AYT231200221	Recessive Supertaster	GC	AG	TC	KP	4	Female	21.48	26
AYT231200232	Recessive Supertaster	GC	AG	TC	KP	4	Female	24.61	29
AYT231200237	Recessive Supertaster	GC	AG	TC	PV	4	Male	28.37	20
AYT240100391	Recessive Supertaster	GC	AG	TC	VK	4	Female	18.44	23
AYT240100415	Recessive Supertaster	GC	AG	TC	PV	4	Female	22.91	20
AYT240800559	Recessive Supertaster	GC	AG	TC	PV	4	Female	19.2	23
AYT240800574	Recessive Supertaster	GC	AG	TC	PV	4	Female	17.31	22
AYT240800587	Recessive Supertaster	GC	AG	TC	P	4	Female	15.74	21
AYT240800600	Recessive Supertaster	GC	AG	TC	VK	4	Male	21.14	22
AYT240900618	Recessive Supertaster	GC	AG	TC	PV	4	Female	20.18	23
AYT240900630	Recessive Supertaster	GC	AG	TC	PV	5	Female	18.03	22
AYT231200184	Recessive Supertaster	GC	AG	TC	VK	5	Female	18.62	26
AYT240800539	Recessive Supertaster	GC	AG	TC	VK	5	Female	20.62	22
AYT240800555	Recessive Supertaster	GC	AG	TC	VK	5	Female	23.06	22
AYT240800563	Recessive Supertaster	GC	AG	TC	VK	5	Male	18.09	24
AYT240800590	Recessive Supertaster	GC	AG	TC	PV	5	Female	17.51	23
AYT240800591	Recessive Supertaster	GC	AG	TC	PV	5	Female	17.4	22
AYT240800599	Recessive Supertaster	GC	AG	TC	VK	NA	Female	24.03	23
AYT231200162	Recessive Supertaster	GC	AG	TC	VK	NA	Female	27.04	43
AYT231200212	Recessive Supertaster	GC	AG	TC	VK	NA	Female	23.24	26
AYT231200217	Recessive Supertaster	GC	AG	TC	VK	NA	Male	25.95	28
AYT231200228	Recessive Supertaster	GC	AG	TC	PV	NA	Male	23.81	24
AYT231200236	Recessive Supertaster	GC	AG	TC	VK	NA	Female	20.28	20
AYT231200267	Recessive Supertaster	GC	AG	TC	PV	NA	Male	18.78	24
AYT240100396	Recessive Supertaster	GC	AG	TC	PV	NA	Female	21.67	20
AYT240100416	NA	NA	NA	NA	PV	0	Female	15.36	19
AYT231200140	NA	NA	NA	NA	KP	0	Male	23.51	36
AYT240900623	NA	NA	NA	NA	V	3	Female	24.18	23
AYT231200285	NA	NA	NA	NA	KP	NA	Male	20.28	20
AYT240100418	NA	NA	NA	NA	NA	NA	Female	20.31	21
Average								23.4779	27.716

## Sheet: Supp_T_10
Cluster_4_Plants	Botanical_Name	Plant_Family	Reference	Ayurveda_Name	Common Uses
Berberis aristata	Berberis aristata DC	Berberidaceae	Government of India, Ministry of AYUSH. The Ayurvedic Pharmacopoeia of India. Part I, Vol. II. New Delhi: Government of India; 1999. p. 34-36.	Daruharidra	Ear, Eye and oral cavity diseases,Wound healing,Diabetes & UTis,Itching & pain in Ear, Eye and oral cavity,Skin issues, herpes, anti- poison,Hot in potency,* Dry in nature etc. etc.
Berberis asiatica	Berberis asiatica Roxb. ex DC	Berberidaceae		not described in classical text.
Berberis brandisiana	Berberis brandisiana Ahrendt	Berberidaceae		not described in classical text.
Berberis chitria	Berberis chitria Buch.-Ham. ex Lindl	Berberidaceae		not described in classical text.
Berberis concinna	Berberis concinna Hook.f..	Berberidaceae		not described in classical text.
Berberis coriaria	Berberis coriaria Royle ex Lindl.	Berberidaceae		not described in classical text.
Berberis floribunda	Berberis floribunda Wall. ex G.Don.	Berberidaceae		not described in classical text.
Berberis lambertii	Berberis lambertii R.Parker	Berberidaceae		not described in classical text.
Berberis lycium	Berberis lycium Royle	Berberidaceae		not described in classical text.
Berberis orthobotrys	Berberis orthobotrys Bienert ex B.D. Jacks.	Berberidaceae		not described in classical text.
Berberis petiolaris	Berberis petiolaris Wall. ex G.Don	Berberidaceae		not described in classical text.
Berberis pseudumbellata	Berberis pseudumbellata R.Parker	Berberidaceae		not described in classical text.
Berberis tinctoria	Berberis tinctoria Lesch.	Berberidaceae		not described in classical text.
Berberis virescens	Berberis virescens Hook.f.	Berberidaceae		not described in classical text.
Berberis vulgaris	Berberis vulgaris L.	Berberidaceae		not described in classical text.
Berberis wallichiana	Berberis wallichiana DC.	Berberidaceae		not described in classical text.
Cocculus pendulus	Cocculus pendulus (J.R.Forst. & G.Forst.) Diels	Menispermaceae		not described in classical text.
Coptis teeta	Coptis teeta Wall.	Ranunculaceae	Bhavamishra. Bhavaprakasha Nighantu. Commentary by Chunekar KC, edited by Pandey GS. Varanasi: Chaukhambha Bharati Academy; 2002. Appendix (Parishishta), p. 834.	Mamira	Arphrodisiac, dry, hot, appetiser, laxative, good for eyes, improves digestion, enhances the taste of food, and is helpful in pacifying Kapha and pitta dosha, liver-protective, useful in typhoid or other kind of complex fever,eye diseases, various skin inflammatory diseases,Cough,respiratory diseases, UTIs, diabetes,fever etc.
Coscinium fenestratum	Coscinium fenestratum (Gaertn.) Colebr.	Menispermaceae	Government of India, Ministry of AYUSH. The Ayurvedic Pharmacopoeia of India. Part I, Vol. V. New Delhi: Government of India; 2006. p. 75-77.	Kaliyaka	improve digestion, reduce Pitta - Kapha, blood purifier etc.
Fibraurea tinctoria	Fibraurea tinctoria Lour.	Menispermaceae		not described in classical text.
Jateorhiza palmata	Jateorhiza palmata (Lam.) Miers	Menispermaceae	Bhavamishra. Bhavaprakasha Nighantu. Commentary by Chunekar KC, edited by Pandey GS. Varanasi: Chaukhambha Bharati Academy; 2002.Karpuradivarga, p. 191.	use as substitute for Daruharidra (Kaleeyaka)
Mahonia napaulensis	Mahonia napaulensis DC.	Berberidaceae		not described in classical text.
Momordica cochinchinensis	Momordica cochinchinensis (Lour.) Spreng.	Cucurbitaceae		not described in classical text.
Mukia maderaspatana	Mukia maderaspatana (L.) M. Roem.	Cucurbitaceae		not described in classical text.
Solena amplexicaulis	Solena amplexicaulis (Lam.) Gandhi	Cucurbitaceae		not described in classical text.
Anamirta cocculus	Anamirta cocculus (L.) Wight & Arn	Menispermaceae		not described in classical text.
Nandina domestica	Nandina domestica Thunb.	Berberidaceae		not described in classical text.
Papaver orientale	Papaver orientale L.	Papaveraceae		not described in classical text.
Stephania glabra	Stephania glabra (Roxb.) Miers	Menispermaceae		Rajapatha	Arphrodisiac, detoxifier, anti -poison, useful in skin disorder, relieves in itching, vomiting, cardiac diseases, fever, diarrhea, colic pain, intestinal worms, bloating, wound healing, balance tridosha.
Thalictrum alpinum	Thalictrum alpinum L.	Ranunculaceae		not described in classical text.
Thalictrum foliolosum	Thalictrum foliolosum DC	Ranunculaceae	Bhavamishra. Bhavaprakasha Nighantu. Commentary by Chunekar KC, edited by Pandey GS. Varanasi: Chaukhambha Bharati Academy; 2002.Guduchyadivarga, p. 433.	Trayamana	consider as substitute of Coptis teeta, usful in fever, indigetion, diuretic, external application in eye disesases.
Thalictrum javanicum	Thalictrum javanicum Blume	Ranunculaceae		not described in classical text.
Thalictrum minus	Thalictrum minus L.	Ranunculaceae		not described in classical text.
Tinospora sinensis	Tinospora sinensis (Lour.) Merr.	Menispermaceae		not described in classical text.

## Sheet: Supp_Table_11
Cluster	Plant count
-1	354
0	23
1	25
2	1338
3	23
4	35
5	30
6	40
7	20
8	32
9	76
10	49
11	49
12	63
13	40
14	30
15	22
16	27
17	51
18	171
19	52
20	50
21	27
